# Supplementary material for: Oncofetal TRIM71 drives liver cancer carcinogenesis through remodeling CEBPA-mediated serine/glycine metabolism
Source: PubMed Central journal article supplement (PMC11388079; doi:10.7150/thno.99633), 2024-08-12
Supplement: thnov14p4948s1.pdf [file thnov14p4948s1.pdf]

## **Oncofetal TRIM71 drives liver cancer carcinogenesis through remodeling CEBPA-mediated serine/glycine metabolism**

Ying Su<sup>1, 2, \*</sup>, Ziteng Li<sup>2, \*</sup>, Qin Li<sup>2, \*</sup>, Xinyi Guo<sup>1, 2</sup>, Hena Zhang<sup>1, 2</sup>, Yan Li<sup>1, 2</sup>, Zhiqiang Meng<sup>1, 2, †</sup>, Shenglin Huang<sup>1, 2, †</sup>, Zhixiang Hu<sup>1, 2, †</sup>

<sup>1</sup>Department of Integrative Oncology, Fudan University Shanghai Cancer Center, and Shanghai Key Laboratory of Medical Epigenetics, International Co-laboratory of Medical Epigenetics and Metabolism, Institutes of Biomedical Sciences, Shanghai Medical College, Fudan University, Shanghai, China.

<sup>2</sup>Department of Oncology, Shanghai Medical College, Fudan University, Shanghai, China.

\* These authors contributed equally to this work.

† **Correspondence:** Zhixiang Hu, Ph.D., Email: zhixiang\_hu@fudan.edu.cn; Shenglin Huang, Ph.D., Email: slhuang@fudan.edu.cn; or Zhiqiang Meng, M.D., Email: mengshca@fudan.edu.cn. Department of Integrative Oncology, Fudan University Shanghai Cancer Center, and Shanghai Key Laboratory of Medical Epigenetics, International Co-laboratory of Medical Epigenetics and Metabolism, Institutes of Biomedical Sciences, Shanghai Medical College, Fudan University, 305 Rm., 7# Bldg., 270 Dong An Rd., Shanghai, 200032, China;

## **Materials and Methods**

### **Cell culture and chemical reagents**

HuH-7, HuH-6, Hep3B, HepG2, SNU-449, MHCC97H, HCCLM3, Li-7, HEK-293T cells were purchased from Shanghai Cell Bank Type Culture Collection (Shanghai, China) and cultured in DMEM (BasalMedia, L110KJ, Shanghai, China) culture media supplemented with 10% FBS (ExCell Bio, FSP500, Shanghai, China), 1% penicillin-streptomycin (BasalMedia, S110JV). All cell lines were grown in incubator at 37 °C and 5% CO<sub>2</sub> and were authenticated by short tandem repeats (STR) sequencing. Routine mycoplasma testing was carried out to ensure cells free of contamination before proceeding with further experiments. Retinoic acid was purchased from MedChemExpress (HY-14649, Shanghai, China) and used at a concentration of 2 μM for cells treatment. For in vitro spheres formation assay, 6,000 Li-7 liver cancer cells infected with PCDH-empty or PCDH-TRIM71 lentiviruses were seeded in flat-bottom ultralow attachment 6-well plates (Corning, NY, USA) and cultured in DMEM/F12 (11320033, ThermoFisher, IL, USA) supplemented with B-27 supplement (17504044, 1 : 50; Thermo Fisher Scientific) and 20 ng/mL of EGF (315-09, PeproTech) and FGF (100-17A, PeproTech). Hihep liver cells were obtained from professor Lijian Hui (Chinese Academy of Sciences Center for Excellence in Molecular Cell Science, Shanghai, China) and cultured in DMEM/F12 (11320033, ThermoFisher) culture media supplemented with 1% FBS, 1% penicillin-streptomycin, Galactose (G0050000, 2 g/L, sigma), Ornithine (A430329-0200, 0.1 g/L, sangon), L-Proline (A600923-0100, 0.3 g/L, sangon), Nicotinamide (A510659-0250, 0.61 g/L, sigma), ZnCl<sub>2</sub> (208086, 0.544 mg/L, sigma), ZnSO<sub>4</sub>·7H<sub>2</sub>O (A602906-0500, 0.75 mg/L, sangon), CuSO<sub>4</sub>·5H<sub>2</sub>O (A600063-0500, 0.2 mg/L, sangon), MnSO<sub>4</sub> (A600248-0500, 0.025 mg/L, sangon), ITS-A Supplement (51300044, ThermoFisher), TGF-α (100-16A, 40 ng/mL, PeproTech), EGF (315-09, 40 ng/mL, PeproTech), Dexamethasone (A429708-0500, 10 μM, sangon).

### **Antibodies**

The antibodies against TRIM71 (sc-393352, WB) were purchased from Santa Cruz (USA); CEBPA (8178, ChIP-seq, WB), Myc-tag (2276S, WB, co-IP, IHC), Mouse Anti-rabbit IgG (Conformation Specific) (L27A9) mAb (HRP Conjugate; 5127s, WB) were purchased from Cell Signaling Technology (Danvers, MA, USA); AFP (14550-

1-AP, IHC) , MKI67 (GB111141-50, IHC), CD34 (GB113798-50, IHC), CK7 (GB115695, IHC), CK19 (GB15198, IHC), ARG1 (GB11285, IHC), CTNNB1 (GB15016, IHC) were from Servicebio (Shanghai, China); IGF2BP1 (22803-1-AP, WB, co-IP), PSPH (14513-1-AP, WB), PSAT1 (10501-1-AP, WB), ACTB (20536-1-AP, WB), METTL3 (15073-1-AP, WB), METTL14 (26158-1-AP, WB), GAPDH (60004-1-Ig, WB). HRP-conjugated Affinipure Goat Anti-Mouse IgG(H + L) (SA00001-1, WB), HRP-conjugated Affinipure Goat Anti-Rabbit IgG(H + L) (SA00001-2, WB), CD133 (18470-1-AP, WB), CD24 (10600-1-AP, WB), EPCAM (21050-1-AP), GPC3 (30021-1-AP, IHC) were from Proteintech (Wuhan, China), IGF2BP1 (A22612, WB, co-IP), CEBPA (A25033, WB) were from ABclonal (Wuhan, China), m6A antibody was from Sigma (ABE572).

### **Plasmid construction**

The open reading frame (ORF) of TRIM71 with a Myc-tag and a 6x His-tag at the C terminus were amplified and subcloned into pCDH-puro vector (SBI, Palo Alto, CA, USA) using ClonExpress Ultra One Step Cloning Kit (Vazyme, C115-02, Nanjing, China). The pT3 vector, pCMV(CAT)T7-SB100 and pX330-U6-Chimeric\_BB-CBh-hSpCas9 were kindly provided by professor Yongzhong Liu (Shanghai Jiaotong University, Shanghai, China). The fragments of the truncated TRIM71, including  $\Delta$ NHL,  $\Delta$ Filamin,  $\Delta$ Coild-coil,  $\Delta$ B-Box and  $\Delta$ RING, were amplified based on pCDH-TRIM71-Myc-6xHis and inserted into pCDH vector. The CDS and 3'UTR regions of CEBPA containing m6A modification were amplified from HuH-7 genomic DNA and subclone into pGL3 basic vector. The CDS of YAP5SA with a Myc-tag at the N terminus were produced from plasmid encoding YAP5SA kindly provided by professor Faxing Yu (Fudan University, Shanghai, China), and constructed into pT3 vector. The sgRNA against TRIM71 and CEBPA were inserted into lentiGuide-Puro vector (a generous gift from Dr. Feng Zhang). The sgRNA sequences targeting PspH were inserted into pX330 vector. The primer sequences for all vectors' construction are provided in Table S4.

### **siRNA transfection**

All the siRNAs were ordered from Ribobio (Guangzhou, China) and the sequences used in the study are listed in Table S4. Liver cancer cells were seeded in 6-well plates to allow 30% confluency in the next day. Negative control siNC and siRNAs

against target genes (TRIM71, CEBPA, METTL3, METTL14, IGF2BP1, PSPH) were transfected into cells using RNAimax (Thermo, 13778150). siRNA was utilized at a working concentration of 50 nM. Cells were harvested at 48 h post-transfection and then performed qPCR analysis or immunoblot to evaluate knockdown efficiency of target genes.

### **RNA isolation, cDNA synthesis, qRT-PCR**

Total RNA was isolated from cultured cells and tumor tissues with TRIzol reagents (Thermo, 15596018, USA) following the manufacturer's protocols. RNA concentration was determined using a NanoDrop spectrometer (Thermo). To obtain complementary DNA, 0.5 µg total RNA was used for reverse transcription with RT Master mix (Accurate Biology, AG11706, China) according to the manufacturer's guidelines. Quantitative real-time PCR (qRT-PCR) was performed using SYBR Green Pro Taq HS Premix (Accurate Biology, AG11701) on ABI 7900HT Fast Real-Time PCR System (Thermo).  $\beta$ -actin was set as loading control for gene expression evaluation. Primers used in the qRT-PCR analysis are listed in Table S4.

### **RIP-seq and RIP-qPCR**

RIP experiments were performed with HuH-7 cells stably expressing pCDH-puro-TRIM71-Myc. Cells were seeded in a 10 cm dish and collected when cells reached 80% confluence, washed two times with cold PBS and centrifuged at 1,000 g for 3 min at 4 °C. The cell pellets were resuspended in 1 mL RIP lysis buffer (20 mM Tris pH 7.4, 150 mM NaCl, 0.2% NP40, 1 mM EDTA, 20% glycerol) supplemented with protease inhibitor cocktail and RNase inhibitors, and lysed on ice for 30 min. The lysate was cleared by centrifuging at 17,000g for 10 min at 4 °C. A part of the volume of the supernatant was set aside as input and mixed with 800 µL Trizol reagent. The remaining cell lysate were incubated with protein G magnetic beads pre-conjugated with anti-Myc-tag antibody or corresponding control IgG at 4 °C overnight. After incubation, the RNA-protein-bead complexes were washed with cold NT2 buffer (20 mM Tris-HCl pH 7.5, 150 mM NaCl, 1 mM MgCl<sub>2</sub>, 0.05% NP40) four times at 4 °C for 5 min, and mixed with 800 µL Trizol reagent. RNA from the input and immunoprecipitation samples was extracted with Trizol reagent referring to manufacturer's protocol and concentration of RNA were determined by NanoDrop spectrometer. For RIP-seq assay, libraries were prepared using NEB Next Ultra

Directional RNA Library Prep kit (New England Biolabs, Beverly, MA, USA) following the manufacturer's protocol and sequenced on an Illumina Novaseq 6000 sequencer. For RIP-qPCR assay, equal volumes of RNA samples were subjected to reverse transcription to synthesize cDNA, followed by appropriate dilution for qPCR detection of the enrichment signal of TRIM71 on CEBPA mRNA. The RIP relative enrichment ratio was calculated by comparing the signal values of the Myc-tag group and IgG group to input sample. Primers used in the RIP-qPCR assay are listed in Table S4.

### **MeRIP-seq and MeRIP-qPCR**

Total RNA from HuH-7 cells was extracted using TRIzol reagent referring to manufacturer's protocol. The obtained RNA was subjected to DNase I treatment at 37 °C for 15 min to eliminate potential DNA contamination. Then, the total RNA was fragmented to approximately 200 nucleotides in length via metal-ion-induced fragmentation. Protein-G magnetic beads were washed three times with IP buffer (20 mM Tris-HCl pH 7.5, 150 mM NaCl, 0.1% NP40) and incubated with anti-m6A antibody (Sigma, ABE572) in 200 µL IP buffer at room temperature for 1 h. The antibody-conjugated protein G beads were washed three times with 500 µL IP buffer and incubated with the supernatant containing fragmented total RNA supplemented with RNase Inhibitor at 4 °C for overnight. After incubation, the RNA-protein-bead complexes were washed in 500 µL IP buffer two times at 4 °C for 5 min and then washed twice in high-salt IP buffer (20 mM Tris-HCl pH 7.5, 500 mM NaCl, 0.1% NP40) at 4 °C for 5 min. Immunoprecipitated RNA fragments was eluted from beads using RNeasy Mini Kit (Qiagen, Valencia, CA, USA). For MeRIP-seq, libraries were prepared with RNA fragments from input and IP samples by smart-seq method and sequenced an Illumina NovaSeq 6000 sequencer with the paired-end 150 bp read option. For m6A RIP-qPCR, an equivalent volume of RNA samples was employed for reverse transcription to generate cDNA. Next, appropriate dilution of the cDNA was carried out for subsequent qPCR analysis. The relative abundance of m6A on CEBPA mRNA in HuH-7 cells expressing siNC, siMETTL3 or siMETTL14, was determined by normalizing to input. Primers used in the MeRIP-qPCR experiment are listed in Table S4.

### **RNA-sequencing (RNA-seq)**

For RNA-seq, total RNA extraction was carried out using TRIzol reagent referring to the manufacturer's protocol. Before RNA library construction, rRNAs were removed using the RiboMinus Eukaryote kit (Qiagen, Valencia, CA, USA). RNA libraries were obtained using the NEB Next Ultra Directional RNA Library Prep kit (New England Biolabs, Beverly, MA, USA). Briefly, RNA samples were fragmented, cDNA was synthesized, and cDNA ends were repaired. cDNA fragments were then ligated to adaptor sequences, treated with uracil DNA glycosylase, purified and subjected to quality control using a Bioanalyzer 2100 (Agilent, Santa Clara, CA, USA) and sequenced using a HiSeq 3000 (Illumina, San Diego, CA, USA). Sequencing reads were aligned to the human reference genome (hg38) and normalized into FPKM (fragments per kilo base of transcript per million mapped reads) values.

### **RNA pulldown**

Biotinylated RNA oligonucleotides, incorporating adenosine or m<sup>6</sup>A, were synthesized (Hippobio, China) and subjected to denaturation at 99 °C for 10 minutes, followed by a gradual cooling to room temperature to facilitate the formation of stem-loop structures prior to utilization. Then biotin-labelled RNA oligonucleotides were fixed onto streptavidin magnetic beads in NT2 buffer. HuH-7 cells expression siNC or siIGF2BP1 were seeded in a 10 cm dish and harvested at 80% confluence to conduct RNA pull-down assay. Cells were lysed with lysis buffer (20 mM Tris pH 7.4, 150 mM NaCl, 0.2% NP40, 1 mM EDTA, 20% glycerol) containing protease inhibitor cocktail and RNase inhibitors and incubated on ice for 30 min. A part of the volume of the supernatant was taken as input control, and the remaining samples were subdivided into two equal portions and incubated with biotin-conjugated RNA oligonucleotides with adenosine or m<sup>6</sup>A modification overnight at 4 °C. Next, protein-RNA-bead complexes were washed with cold NT2 buffer four times at 4 °C for 5 min, followed by the addition of a suitable volume of SDS loading buffer and denaturation of the protein at 95 °C for 5 min. Analysis of the interaction between the target proteins and m<sup>6</sup>A-modified RNA oligonucleotides was carried out using immunoblot.

### **ChIP-seq**

Approximately  $1 \times 10^7$  HuH-7 cells were crosslinked in adherent conditions with 1% formaldehyde for 10 min at room temperature and the reaction was stopped by adding

0.125 M glycine for 5 min at room temperature. Fixed cells were washed two times with cold PBS and harvested by centrifugation at 1,000 g for 3 min at 4 °C. Cell pellets were resuspended in ChIP lysis buffer A (Cell Signaling Technology, 14282S) containing DTT and protease inhibitor cocktail on ice for 10 min, and then resuspended with ChIP lysis buffer B (Cell Signaling Technology, 14282S) containing DTT. Chromatin was digested with Micrococcal Nuclease (Cell Signaling Technology, 10011S) at 37 °C for 20 min and then the reaction was terminated with EDTA on ice for 2 min. Cells were pelleted and resuspended in ChIP buffer (Cell Signaling Technology, 14231S) with protease inhibitor cocktail, and sonicated to yield DNA fragments to length of approximately 300 bp. The crosslinked DNA-protein-containing supernatants were obtained by centrifugation at 10,000 g for 10 min at 4 °C. A 1% volume of supernatant was set as input and the remainder was divided equally and incubated with protein G magnetic beads that had been preincubated with indicated antibodies overnight at 4 °C. The DNA-protein-bead complexes were washed four times with ChIP wash buffer (20 mM Tris-HCl pH 7.4, 500 mM NaCl, 1 mM EDTA, 1% NP40, 0.05% SDS) and de-crosslinked, and then treated with RNase A and proteinase K to digest RNA and protein. DNA fragments were extracted using MinElute Reaction Cleanup Kit (Qiagen, 28606) and DNA concentration was determined by Qubit (Thermo). For ChIP-seq, libraries were prepared with KAPA Hyper-Prep Kits (Roche, KK8502) following the manufacturer's protocol and sequenced on an Illumina Novaseq 6000 sequencer. Sequenced reads were aligned to hg38 using bowtie2.

### **Co-immunoprecipitation (Co-IP) and immunoprecipitation mass (IP-mass)**

For Co-IP and IP-mass, cultured cells were collected and washed with cold PBS, lysed with IP lysis buffer (50 mM Tris-HCl pH 7.5, 150 mM NaCl, 0.2% NP40, 20% glycerol) containing 1 × protease inhibitor cocktail (MedChemExpress, HY-K0010, China) on ice for 30 min. The lysate was subsequently clarified by centrifugation at 12,000g for 10 min at 4 °C. A 5% of the volume of the lysate was taken as an input control, while the remaining lysate was incubated with Protein G magnetic beads (Thermo, 10004D) pre-coated with primary antibody, and rotated at 4 °C overnight. The Protein G magnetic beads bound to the proteins were captured using a magnetic stand, followed by three washes using NT2 buffer (20 mM Tris-HCl pH 7.5, 150 mM NaCl, 1 mM MgCl<sub>2</sub>, 0.05% NP40) and boiled at 95 °C for 5 min with SDS loading

buffer for Western blotting analysis. The eluted proteins were also subjected to SDS-PAGE for IP-mass analysis (Shanghai Applied Protein Technology, Shanghai, China). Protein identification was retrieved by Mascot version 2.4.01 (Matrix Science, London, UK), in the human RefSeq protein database (National Center for Biotechnology Information).

### **Cell proliferation and colony formation assays**

For the cell proliferation assay, 1,000 to 3,000 cells were seeded per well in a 96-well plate. At the designated time points, the cell culture medium was replaced with a mixture of Cell Counting Kit-8 (CCK-8) reagent (MedChemExpress, HY-K0301) and DMEM in a 1 : 9 ratio, followed by incubation at 37 °C for 1.5 to 2 h. Cell proliferation capacity was evaluated by measuring the absorbance at 450 nm. For the colony formation assays, 2,000 to 5,000 cells were seeded per well in a 6-well plate. After 7 to 10 days, cells were collected, washed 2 times with 1 x PBS, fixed and stained with 1% crystal violet (C0775, Sigma-Aldrich, Missouri, USA) dissolved in methanol for 20 min. Megascopic cell colonies were counted by ImageJ. The impact of target gene silencing or drug administration on cell colony formation capacity was assessed by referencing the control group.

### **Xenograft in nude mice**

For xenograft tumor in nude mice experiment, the stable HuH-7 cells expressing lentiGuide-Puro, lentiGuide-Puro-sgTRIM71 or lentiGuide-Puro-sgCEBPA were first harvested and suspended in DMEM. The experimental animals (male BALB/c-nu/nu, 6-week-old) were randomly divided into groups, with each group containing 6 mice. Each mouse received a subcutaneous injection of  $2 \times 10^6$  cells in 200  $\mu$ L of DMEM mixed with Matrigel (Corning, 356234, USA) into the lower back region. For ATRA and A-485 treatment in liver cancer,  $2 \times 10^6$  HuH-6 liver cancer cells in 200  $\mu$ L of DMEM mixed with Matrigel were injected into lower back region of nude mice and divided into 4 groups. Control mice were treated with saline, ATRA group were treated with ATRA (20 mg/kg) through intraperitoneal injection, A-485 group were treated with A-485 (10 mg/kg) through intraperitoneal injection, and ATRA + A-485 group were treated with ATRA (20 mg/kg) combined with A-485 (10 mg/kg) through intraperitoneal injection. Tumor length (L) and width (W) were assessed using a caliper and monitored at intervals of 3-4 days. Calculation of the tumor volume (V)



was performed using the formula:  $V = (L \times W^2)/2$ . The mice were euthanized, and the xenograft tumors were harvested and weighed. All animal experiments were performed in accordance with guidelines approved by the Animal Care and Use Committee of the Fudan University Shanghai Cancer Center (FUSCC).

### **Hydrodynamic tail vein injection**

Male C57BL/6J mice (6-8 weeks old) were purchased from the Animal Center of Fudan University Shanghai Cancer Center. Mice were fixed into mouse tail injection fixator imaging apparatus (GEGD-Q9G, Mukexi, China), and tail were swabbed to fill blood vessels using 75% ethanol. Plasmids suspended in normal saline solution in a volume equal to 10% of the body weight was injected in 5 to 7 s via the tail vein. The amount of injected plasmids was 20  $\mu\text{g}$  of transposon plasmids together with 3  $\mu\text{g}$  of SB100 transposase plasmids (10  $\mu\text{g}$  of pT3-TRIM71 plasmids + 10  $\mu\text{g}$  of pT3-YAP5SA plasmids + 3  $\mu\text{g}$  of SB100; 10  $\mu\text{g}$  of pT3-TRIM71 plasmids + 3  $\mu\text{g}$  of SB100). Animals were monitored for up to 8 months and were euthanized at specific time points after injection or when symptoms of tumorigenesis such as abdominal enlargement were evident. Livers were pictured and weighted, and tissues were then fixed or frozen for further processing. All animal experiments were performed in accordance with guidelines approved by the Animal Care and Use Committee of the Fudan University Shanghai Cancer Center (FUSCC).

### **Immunohistochemistry (IHC)**

Mouse liver tissues were collected, washed two times with 1 x PBS and immersed in 4% paraformaldehyde for 24 h at room temperature to fix tissue samples. The fixed samples were embedded in paraffin, followed by sectioning at a thickness of 4  $\mu\text{m}$  onto slides and subsequent baking. Tissue sections were deparaffinized with xylene for three times, rehydrated in gradient of ethanol, and then washed with distilled water to remove ethanol. The sections were treated with 10 mM sodium citrate buffer (pH 6.0) and subjected to microwave heating for 20 min for antigen retrieval. Endogenous peroxidase was inactivate using 3% hydrogen peroxide solution for 25 min at room temperature. Then, the slides were blocked with 3% BSA solution at room temperature for 30 min to remove non-specific antigens and incubated with indicated primary antibody in a humidified chamber at 4  $^{\circ}\text{C}$  overnight. Next, the sections were washed and incubated with HRP labeled secondary antibody corresponding to the

species of the primary antibody in a humidified chamber at room temperature for 50 min. IHC staining was developed using DAB as chromogen and hematoxylin as the counterstain to detect the objective signals.

### **Luciferase assays**

HuH-7 and Hep3B cells were seeded in 24-well plates and co-transfected with 500 ng pGL-luc-CEBPA vectors (firefly luciferase, Fluc), 50 ng pRL-CMV-Renilla (Renilla luciferase, Rluc, Promega) reporter vectors and siNC, or siTRIM71 or siIGF2BP1 using RNAimax (Thermo, 13778150). After 48 h of transfection, cells were collected, washed and lysed, and then the Fluc and Rluc luciferase activities were detected by the Dual Luciferase Reporter Gene Assay Kit (YEASEN, 11402ES60). To determine the relative luciferase activity, the Fluc signal values was divided by the Rluc signal values and then normalized to the respective negative control for each assay.

### **Public data analysis using TCGA, DepMap and GepLiver database**

DepMap database (<https://depmap.org/portal/>) was utilized to analyze TRIM71 mRNA expression, expressional correlation, association between target genes expression and cell proliferation, and proliferative correlation for all selected genes in liver cancer cells. The correlation between mRNA expression of target genes and survival time was determined using the TCGA liver hepatocellular carcinoma databases (<https://portal.gdc.cancer.gov/>). The expression pattern of all selected genes in fetal liver, normal liver, and liver diseases was assessed through analysis using the GepLiver database (<http://gepliver.org/>).

### **Human single cell RNA-seq processing**

The integrated liver single cell RNA-seq Seurat object was download from the GepLiver data resource established by our research team previously. Briefly, GepLiver database curated raw reads of single cell RNA-seq datasets from public database and reanalyzed by cellranger using GRCh38 as human genome reference. We removed cells expressed fewer than 300 genes or with a higher mitochondrial gene percent as well as genes expressed in less than 3 cells for quality control. Doublets were also predicted with DoubletFinder R package (v2.0.3) and excluded from analysis. Subsequently, Seurat objects were merged into one followed by two-round Harmony integration and cell type annotation. Epithelial cells were annotated

with canonical cell markers, ALB, TTR and HNF4A for hepatocytes as well as KRT19, EPCAM, TM4SF4 and FXRD2 for cholangiocytes. For epithelial cells from fetal liver, hepatoblasts were additionally identified based on the expression of SPINK1, HNF4A and AFP. Malignancy status according to inferred copy number variation as well as tissue origin were both added to the epithelial annotation, characterizing 7 major cell types including Fetal\_Hepatoblast, Fetal\_Hepatocyte, Fetal\_Cholangiocyte, Hepa\_Malignant, Hepa\_Normal, Chol\_Malignant and Chol\_Normal. Ultimately, single-cell data derived from 63562 epithelial cells of 263 samples involving fetal liver, normal liver, HCC, ICC, HB and tumor adjacent tissues were extracted for downstream analysis.

### **Public RNA-seq datasets processing for human bulk tissue and cancer cell lines**

Human bulk transcriptomic profiles from 1,708 liver samples across 33 datasets, encompassing fetal and normal liver phenotype, liver malignant tumor as well as tumor adjacent samples, were retrieved from GepLiver database. The reprocessed expression matrices were directly used for downstream analysis without any batch correction procedures. RNA-seq raw reads of cancer cell lines were retrieved from Cancer Cell Line Encyclopedia and reprocessed through the standardized pipeline of ASJA program and annotated with GENCODE v29. Counts were normalized to TPM values and log<sub>2</sub>-transformed for use.

### **Pair-wise transcriptomic correlation analysis**

For each liver sample with epithelial cells over 50, single cell transcriptomic profiles were further merged by epithelial cell type into pseudobulks. Top 5,000 variable genes chosen by the coefficient of variation (CV) were used to compute Pearson correlation coefficient for all pair-wise combinations of pseudobulks. Subsequently, correlation heatmap was plotted performing consensus clustering on coefficient matrices with clustering pseudobulks demonstrating similar expression pattern.

### **Oncofetal signature generation and scoring**

Differential analysis was performed between cells derived from oncofetal module and other epithelial cells using Seurat “FindMarkers” function with top 200 features with highest log<sub>2</sub>FC and significant adjust p-value composed oncofetal signature. Oncofetal activity was evaluated with UCell R package in single cells RNA-seq

whereas using ssgsea algorithm for expression profile of bulk tissues and cell lines. Both methods scored the oncofetal signature based on relative rankings of involved features at the single sample level unaffected by sample composition.

To confirm that liver cancer single cells expressing the oncofetal signature are definitely cancer cells, inferCNV to deduce CNVs from scRNA-seq datasets curated by our GepLiver project. InferCNV was utilized to facilitate the comparison of gene expression levels across specific genomic regions against reference cells, thereby identifying somatic chromosomal copy number aberrations. Epithelial cells from tumor samples exhibiting distinct copy number gains or losses were identified as tumor cells. To mitigate batch effects, each dataset was analyzed independently. To avoid the potential algorithmic errors, semi-supervised approach was chosen to designate the malignancy status from inferCNV output. Briefly, the mean of inferCNV observations as the CNV score for each cell was calculated and then compared the CNV scores of tumor cell clusters with those of normal epithelial and endothelial cells to ascertain the malignancy status.

### **Cell developmental potential**

Differentiation states were evaluated for liver epithelial cells of each HCC sample using CytoTRACE R package (version 0.3.3). CytoTRACE is a computational algorithm which estimates gene counts per cell as transcriptomic diversity for measuring single cell relative developmental potential. The CytoTRACE scores range from 0 (relatively more differentiated) to 1 (relatively less differentiated). Furthermore, we inferred cell developmental trajectory using Monocle R package (version 2.22.0) for sample SC14\_HCC\_058 which harbored high abundance of fetal-like cells as well as strong correlation between oncofetal score and cytotrace score. Genes with mean expression  $> 0.1$  and  $\text{dispersion\_empirical} \geq 1 * \text{dispersion\_fit}$  were regarded as variable features for cell ordering. Differentiation trajectories were subsequently built with default parameters. The spectrum of Pseudotime started from 0 which denoted differentiation origin.

### **Pathway enrichment analysis**

Pathway enrichment analysis was performed with clusterProfiler R package (v4.4.4). HALLMARK, KEGG and GO-BP gene sets were obtained from msigdb package

(v7.5.1). Over-represented pathways were enriched for oncofetal signature using enricher function. To explore the transcriptome-wide expression changes in oncofetal phenotype, we also exploited GSEA function for gene set enrichment analysis comparing fetal-like cells and not group among HCC epithelial cells.

### **Filtering for core oncofetal genes with tumorigenic function**

Chronos gene dependency score was obtained from Depmap project (<https://depmap.org/portal/download/all/>, Public 23Q2) to suggest the tumorigenic function of oncofetal genes in CCLE cancer cell lines. The dependency score reflects the scale of effect CRISPR knockout of one gene have on the viability or proliferation of the specific cell line. Genes with scores of 0 represents non-essential for the given cell line. Two kinds of associations were assessed for CCLE liver cancer cell lines to filter for core oncofetal genes with tumorigenic function. Pearson correlation was evaluated for gene expression with both oncofetal scores and gene dependency scores. Genes with the expression positively associated with oncofetal scores indicated favorable contribution to fetal-like phenotype whereas those with the expression negatively correlated to dependency scores suggested a dose-dependent effect on cell viability.

### **Correlation between oncofetal scores and clinicopathological variables**

We assessed the association between oncofetal scores and clinical characteristics in the GepLiver bulk meta-cohort by fitting a linear model for each parameter independently with different source dataset as the covariate to regress out the confounding factor.

### **Statistical analysis**

Statistical analyses were conducted utilizing R software or GraphPad Prism software (Version 9.4.0). All statistical data were represented as the mean  $\pm$  SEM from at least three independent experiments unless otherwise stated. Statistically significant differences of data were determined using unpaired Student's t test and presented as box plots and line graphs. The correlation was analyzed by calculating Pearson correlation coefficients ( $r$ ), and the statistical significance was evaluated using a two-tailed t-test with  $r = 0$ . The survival distributions among experimental groups were compared using the log-rank test and showed as the Kaplan-Meier survival curves. A significance level of  $P < 0.05$  was used to define statistical significance (ns, not significant; \*,  $p < 0.05$ ; \*\*,  $p < 0.01$ ; \*\*\*,  $p < 0.001$ ).



## Supplementary Figures

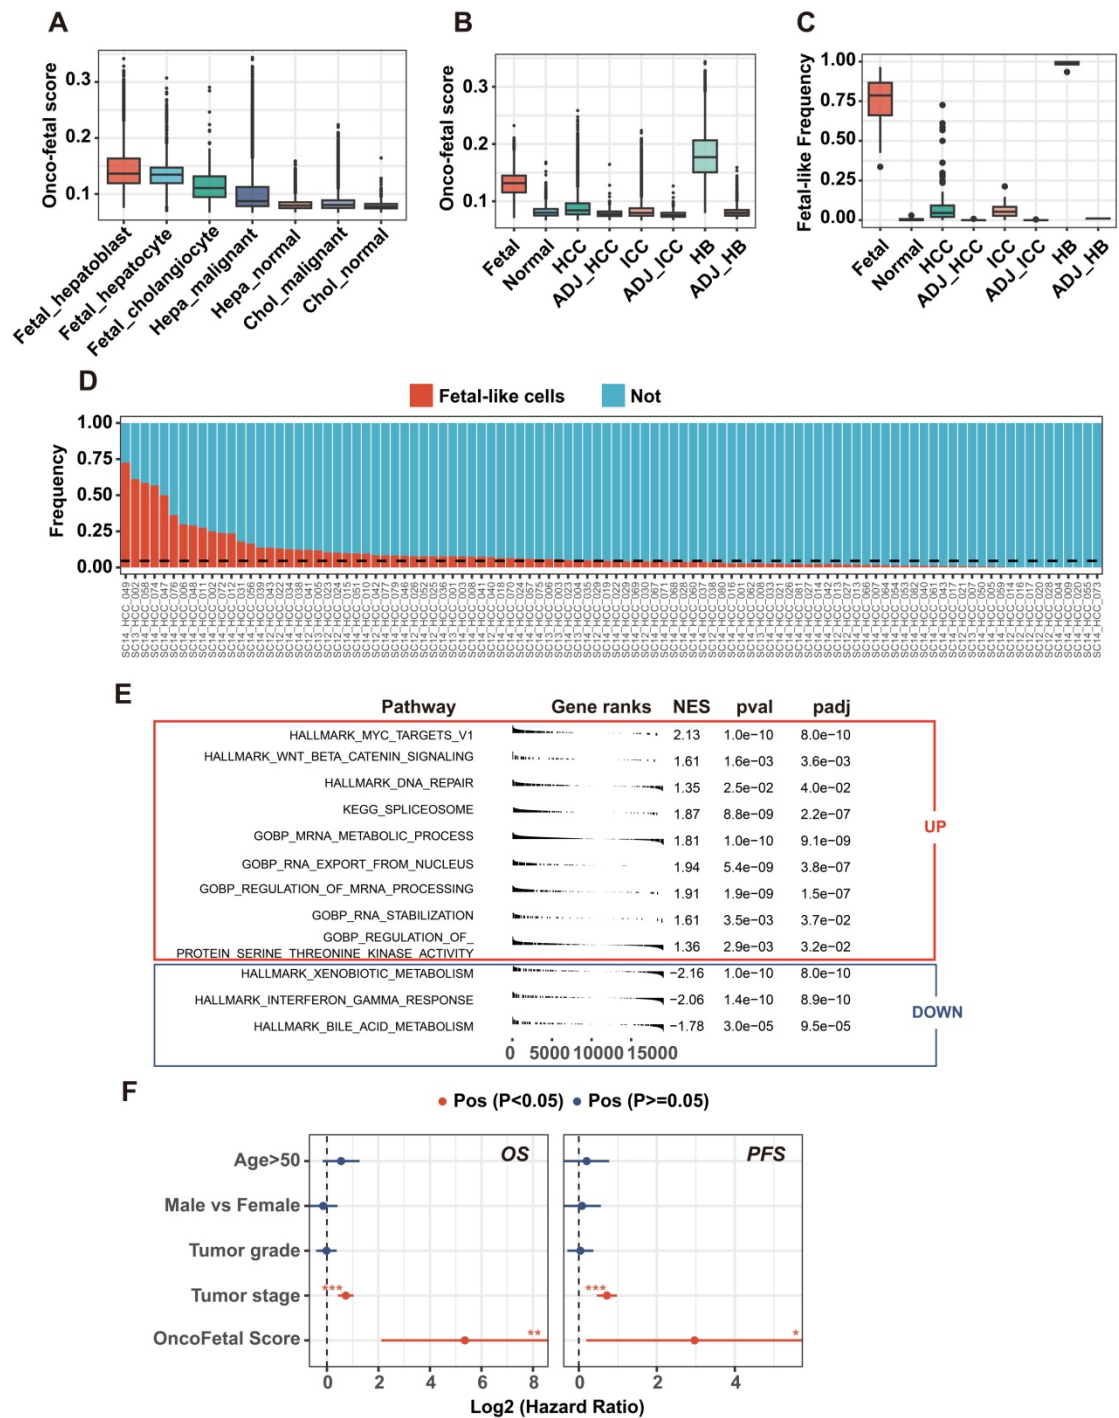

**Figure S1. Evaluating oncofetal signature in single cell and bulk liver datasets.**

(A) Box plot showing oncofetal scores of epithelial cells grouped by cell type. (B) Box plot displaying oncofetal scores of epithelial cells grouped by liver cancer phenotype. (C) Box plot displaying frequency of fetal-like epithelial cells grouped by liver phenotype. Fetal-like cells were defined as epithelial cells with oncofetal score above 95 percent of all normal epithelial cells. For box plots in (A)-(C), center line

represents the median whereas limits show upper and lower quartiles. Data extend beyond the 1.5 times of the interquartile range from box limits were shown as outlier points. (D) Stacked bar plot demonstrating the abundance of fetal-like cells in each HCC sample with over 50 epithelial cells. Black dashed line represents the median frequency of fetal-like cells in all HCC samples. (E) Gene set enrichment analysis performed between fetal-like cells and not group among HCC samples. NES are normalized scores indicating the magnitude of enrichment. NES above 0 denotes upregulated pathways whereas score below 0 denotes downregulated in fetal-like cells. Adjusted p values were computed using Benjamini-Hochberg method. (F) Multivariate Cox proportional hazards regression analysis demonstrating oncofetal signature as negative prognostic factor independent of age, sex, tumor grade and tumor stage.



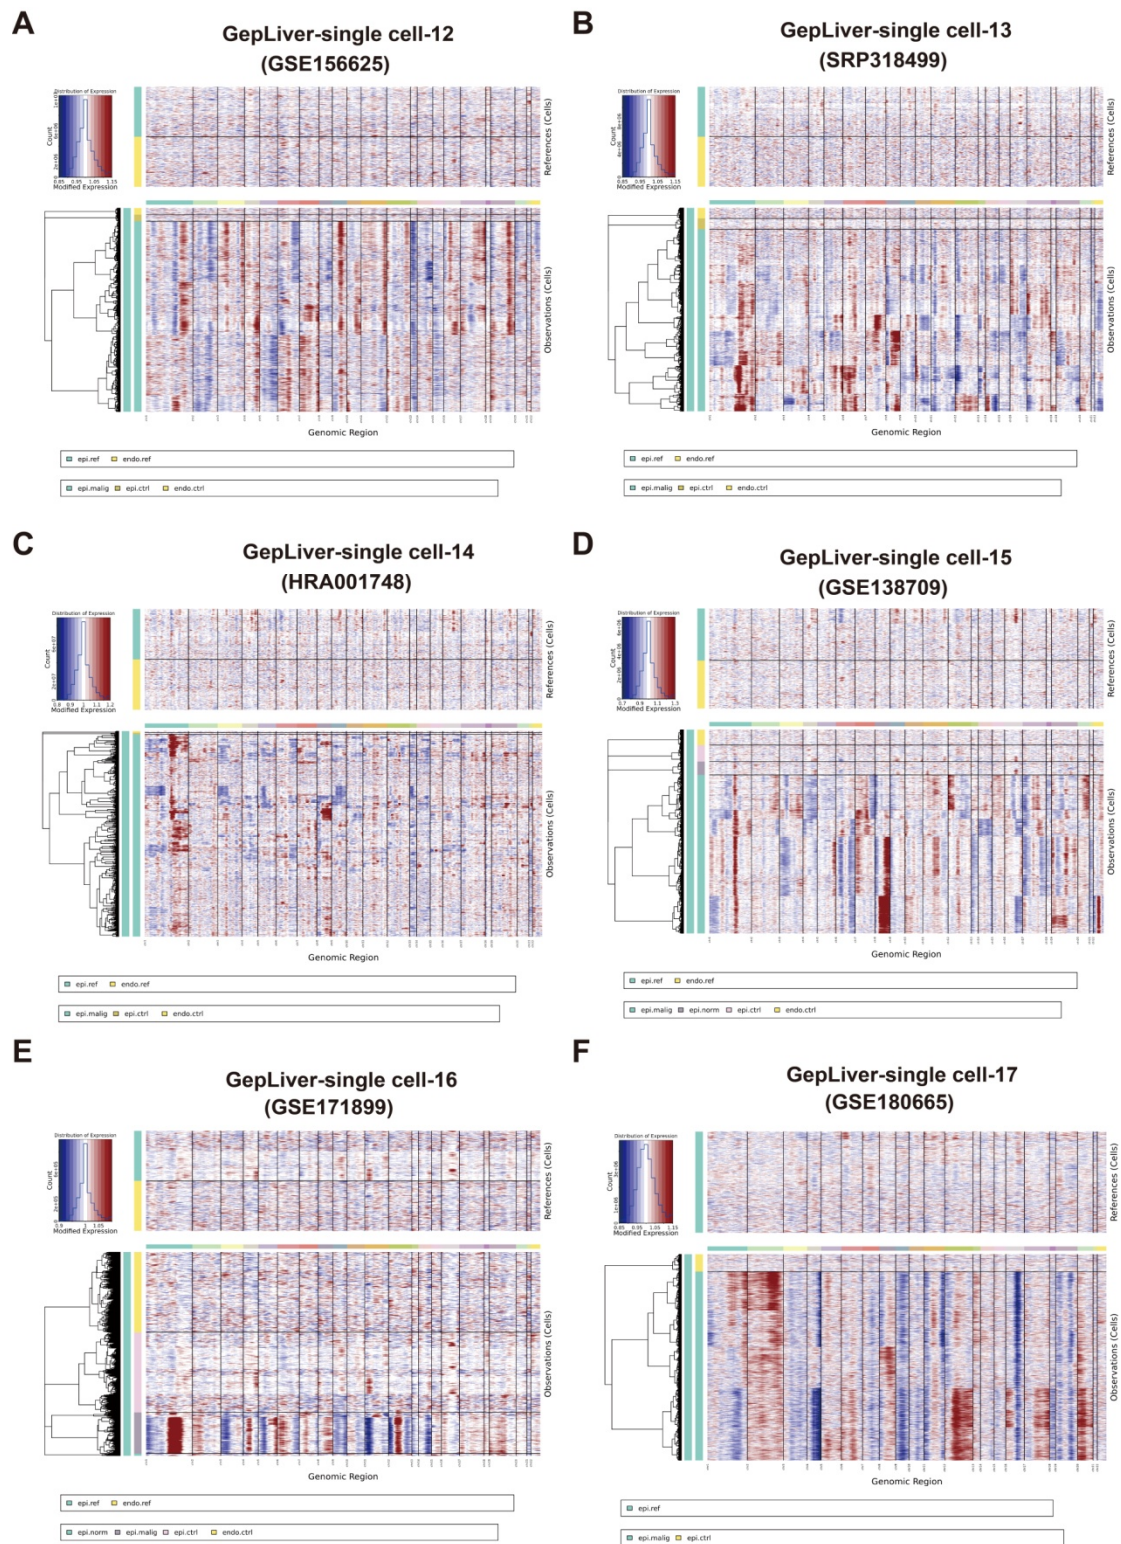

**Figure S2. Heatmaps of relative expression intensities across genomic regions demonstrated copy number variations of cancer cells.** Heatmaps (A-F) were plotted separately for six single cell datasets included containing HCC, HB or ICC tumor tissues. These heatmaps were generated by inferCNV based on the relative gene expression matrices compared to the reference normal cells. The upper panel

exhibited the baseline gene expression of reference cells (epi.ref and endo.ref) of the corresponding dataset whereas the lower panel delineated relative expression intensities for malignant epithelial cells assigned (epi.malig) as well as normal cells as controls (epi.ctrl and endo.ctrl). Malignant epithelial cells demonstrated significant more or less expression in chromosomal regions in contrast to normal reference and control cells, which denotes copy number amplifications or deletions.

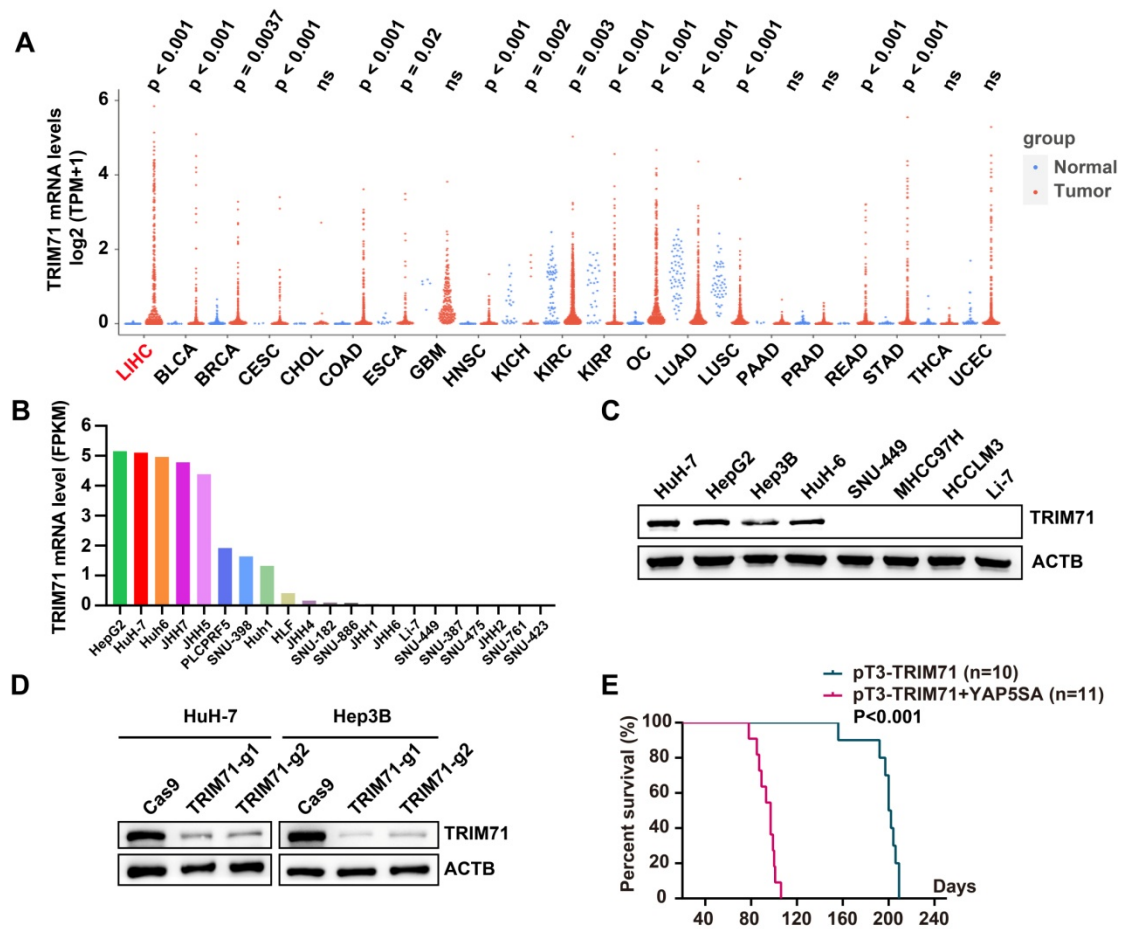

**Figure S3. TRIM71 specifically facilitates liver cancer cell proliferation in vitro.**

(A) The mRNA levels of TRIM71 in pan-cancer tissues and normal tissues from TCGA dataset. (B) The mRNA expression of TRIM71 in multiple liver cancer cell lines via analysis from Depmap database. (C) Immunoblot analysis of TRIM71 protein levels in various liver cancer cell lines. (D) Determination of TRIM71 knockdown efficiency via immunoblot in HuH-7 and Hep3B cells infected with specific sgRNAs targeting TRIM71 and Cas9 lentiviruses. (E) K-M survival curve analysis in mice with overexpression of TRIM71 alone or in combination with overexpression of YAP5SA using the hydrodynamic tail-vein injection.

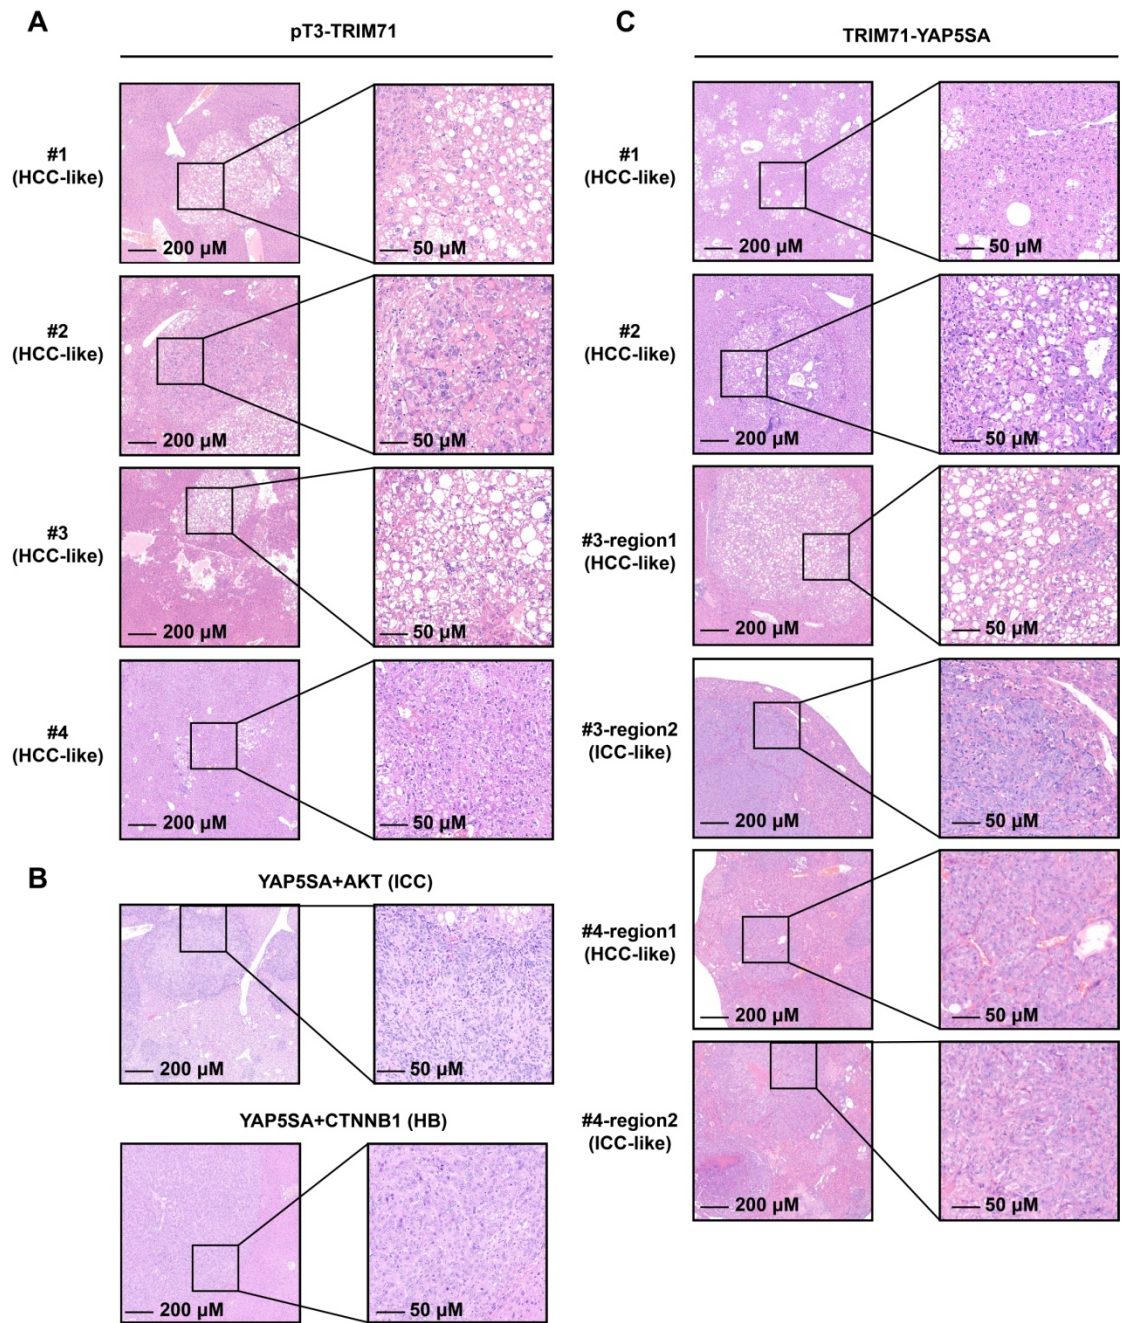

**Figure S4. The HE staining of TRIM71 induced liver cancer tumors in mice.** (A-B) HE staining revealed that the liver tumor cells induced solely by TRIM71 exhibit enlarged nuclei, increased nuclear-cytoplasmic ratio, deepened nuclear staining, prominent nucleoli, and marked cellular pleomorphism. Additionally, the tumor cells contain uniformly sized round lipid droplets within the cytoplasm, and there are abundant sinusoid-like spaces between the tumor cells, and the surrounding hepatocytes show fatty degeneration (A). These morphological features are typical of HCC and are distinctly different from the morphologies induced by YAP5SA + AKT in ICC and YAP5SA + CTNNB1 in HB (B). (C) liver cancer tissues induced by

TRIM71 + YAP5SA exhibited characteristics of both HCC and mixed HCC-ICC features.

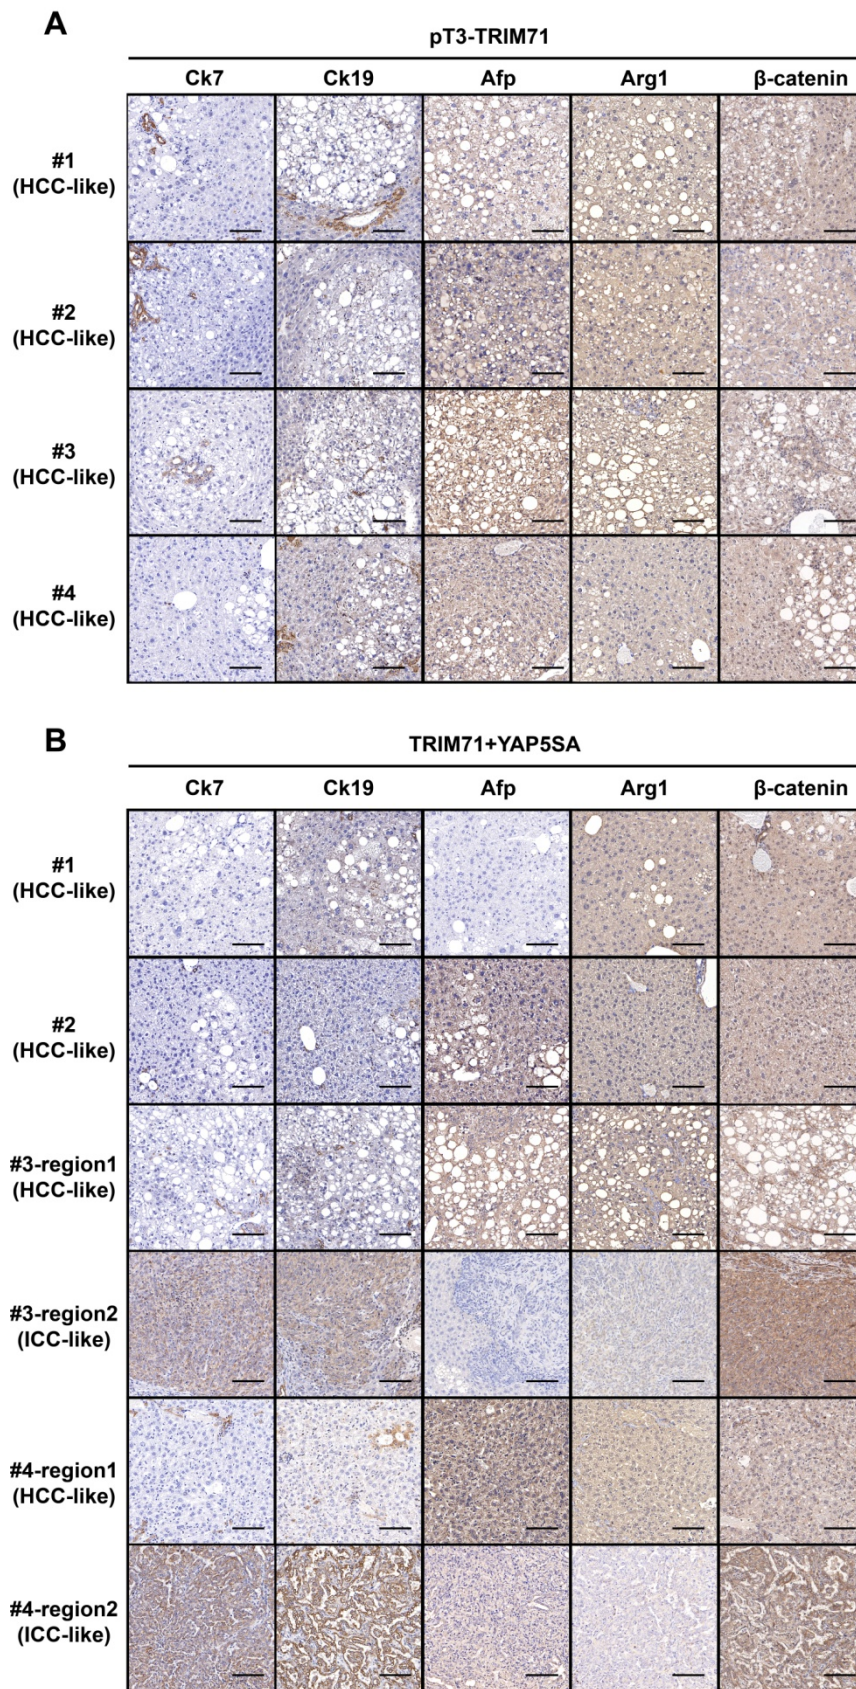

**Figure S5. The IHC staining of TRIM71 induced liver cancer tumors in mice. (A)** Ck7, Ck19, Afp, Arg1,  $\beta$ -catenin were selected to identify the subtype of liver cancer.

Liver tumors of pT3-TRIM71 showed Afp, Arg1 and  $\beta$ -catenin expression but with no Ck7 or Ck19 expression. (B) Liver tumor tissues 1 and 2 with TRIM71 + YAP5SA expression exhibit Arg1 and  $\beta$ -catenin, but do not express Ck7 and Ck19. Conversely, liver tumor tissues 3 and 4 with TRIM71 + YAP5SA show characteristics of mixed HCC-ICC tumors, with some tumor tissues exhibiting features of HCC while other parts display ICC traits. Scare bar = 50  $\mu$ M.

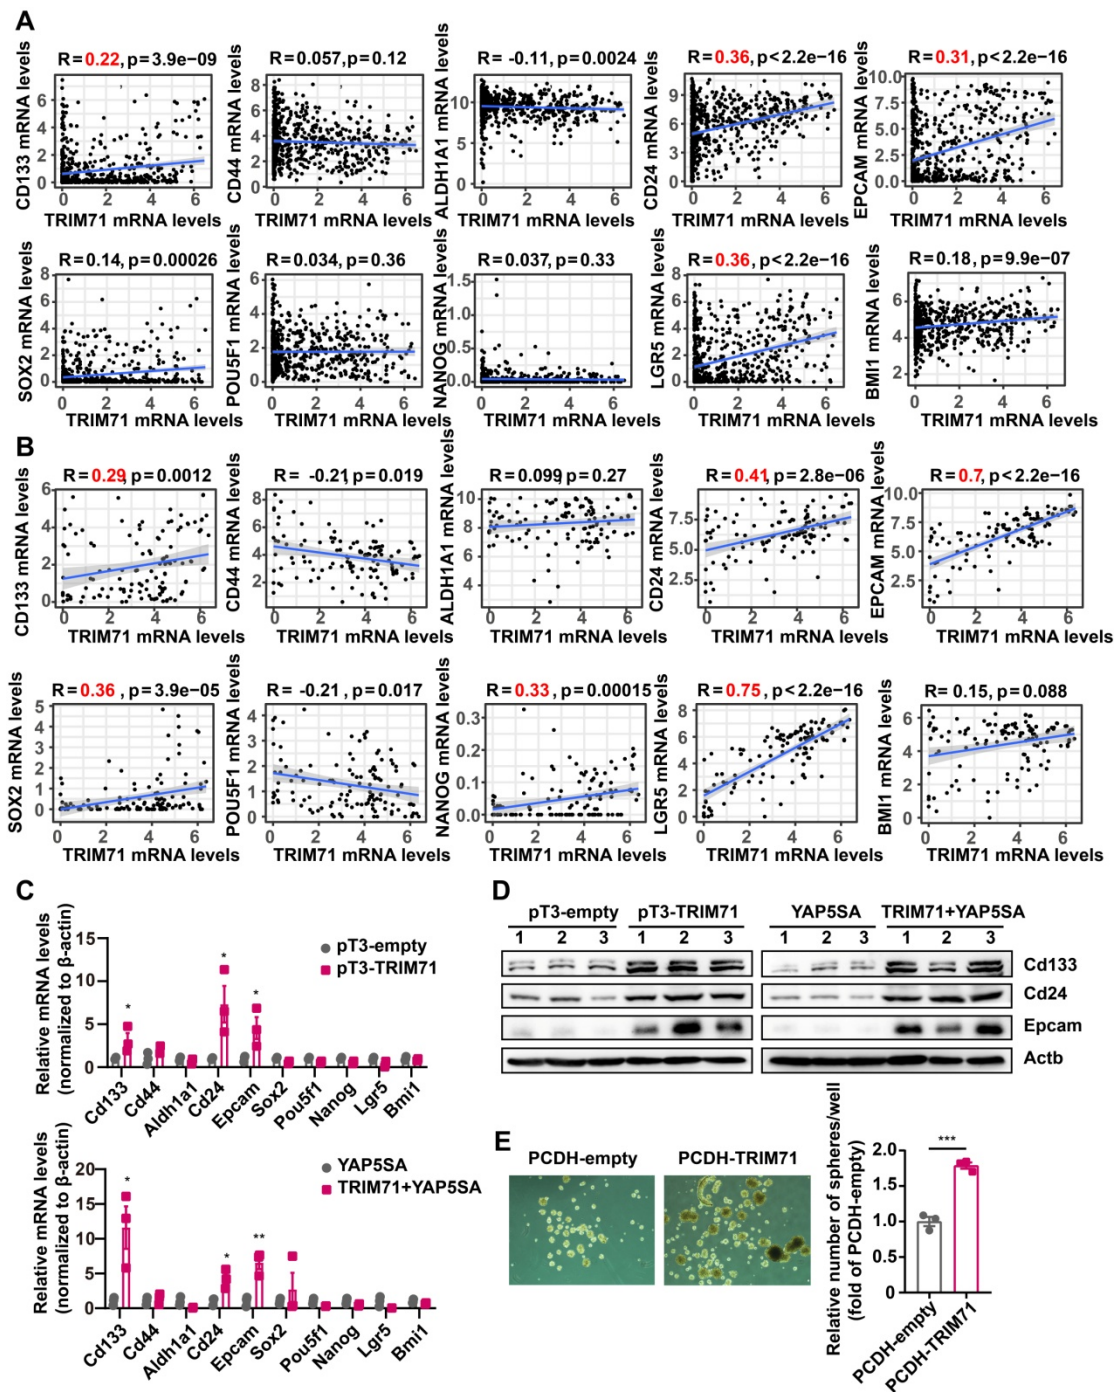

**Figure S6. TRIM71 participates stemness in liver cancer.** (A-B) The mRNA expressional correlation of TRIM71 with CD133, CD44, ALDH1A1, CD24, EPCAM, SOX2, POU5F1, NANOG, LGR5, BMI1 in HCC (A) and HB (B) tissues. (C) The relative mRNA levels of Cd133, Cd44, Aldh1a1, Cd24, Epcam, Sox2, Pou5f1, Nanog, Lgr5, Bmi1 in pT3-empty, pT3-TRIM71, YAP5SA, TRIM71 + YAP5SA liver or tumor tissues. (D) Immunoblot analysis of Cd133, Cd24, Epcam protein levels in pT3-empty, pT3-TRIM71, YAP5SA, TRIM71 + YAP5SA liver or tumor tissues. (E) The in vitro spheres formation ability of liver cancer Li-7 cells infected with PCDH-



empty or PCDH-TRIM71 lentiviruses.  $\beta$ -Actin served as loading control. Values represent the mean  $\pm$  SEM. \*P<0.05, \*\*P<0.01, \*\*\*P < 0.001.

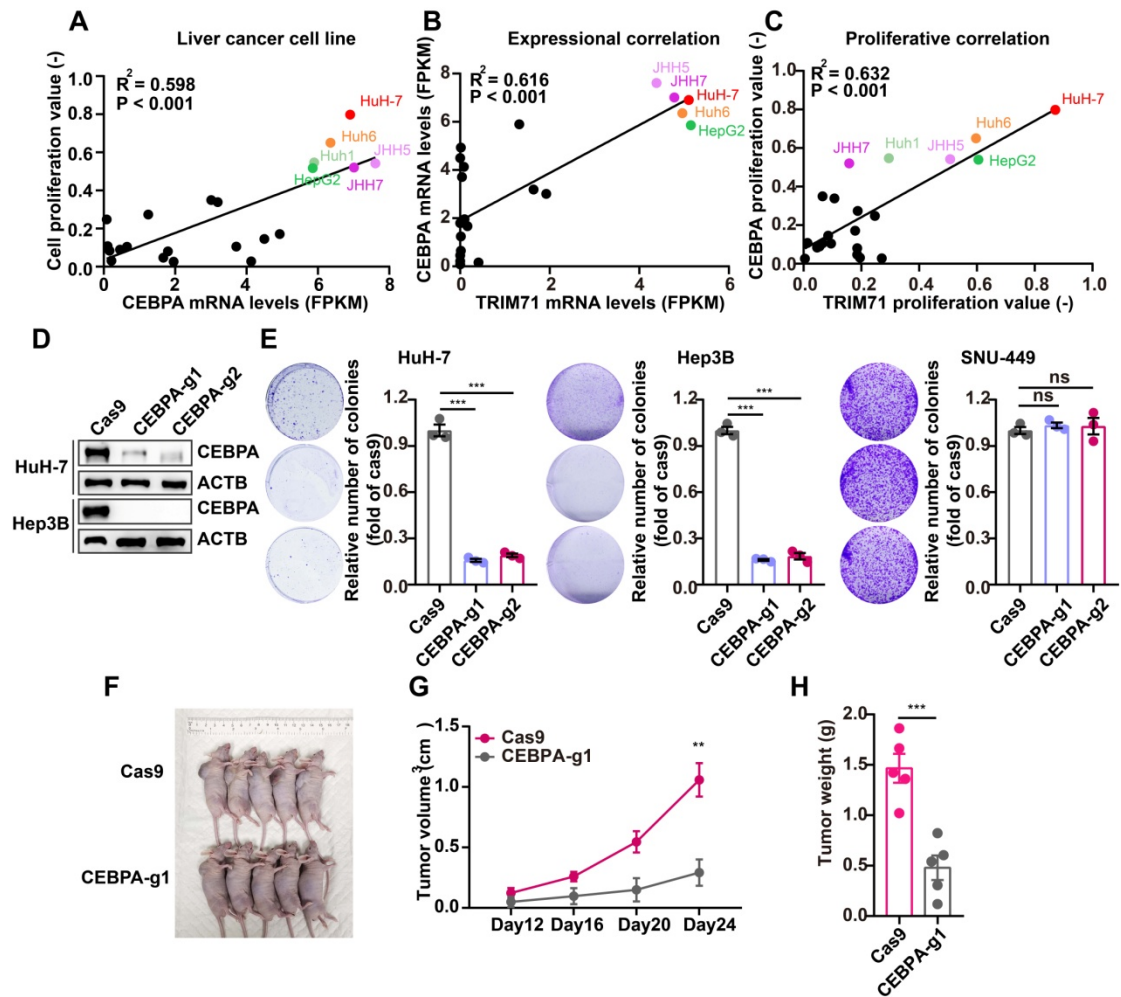

**Figure S7. CEBPA is critical for liver cancer cell proliferation.** (A) Correlation analysis between CEBPA mRNA levels and cell proliferation of liver cancer cell lines. (B) Correlation analysis of mRNA levels between CEBPA and TRIM71 in liver cancer cell lines. (C) Correlation analysis between CEBPA dependent cell proliferation and TRIM71 dependent cell proliferation in liver cancer cell lines. (D) Assessment knockdown efficiency of CEBPA in HuH-7 and Hep3B cells by immunoblot analysis. (E) Effects of CEBPA knockdown on cell proliferation and colony formation in HuH-7, Hep3B and SNU-449 cells infected with ctrl or sgCEBPA lentiviruses. (F) Images of the xenograft mouse models implanted with HuH-7 cells with or without CEBPA knockdown. (G-H) Evaluation of the tumor volume (G) and tumor weight (H) of HuH-7 xenograft tumors with or without CEBPA knockdown. Values represent the mean  $\pm$  SEM. \*\*P < 0.01, \*\*\*P < 0.001. ns: no significance.

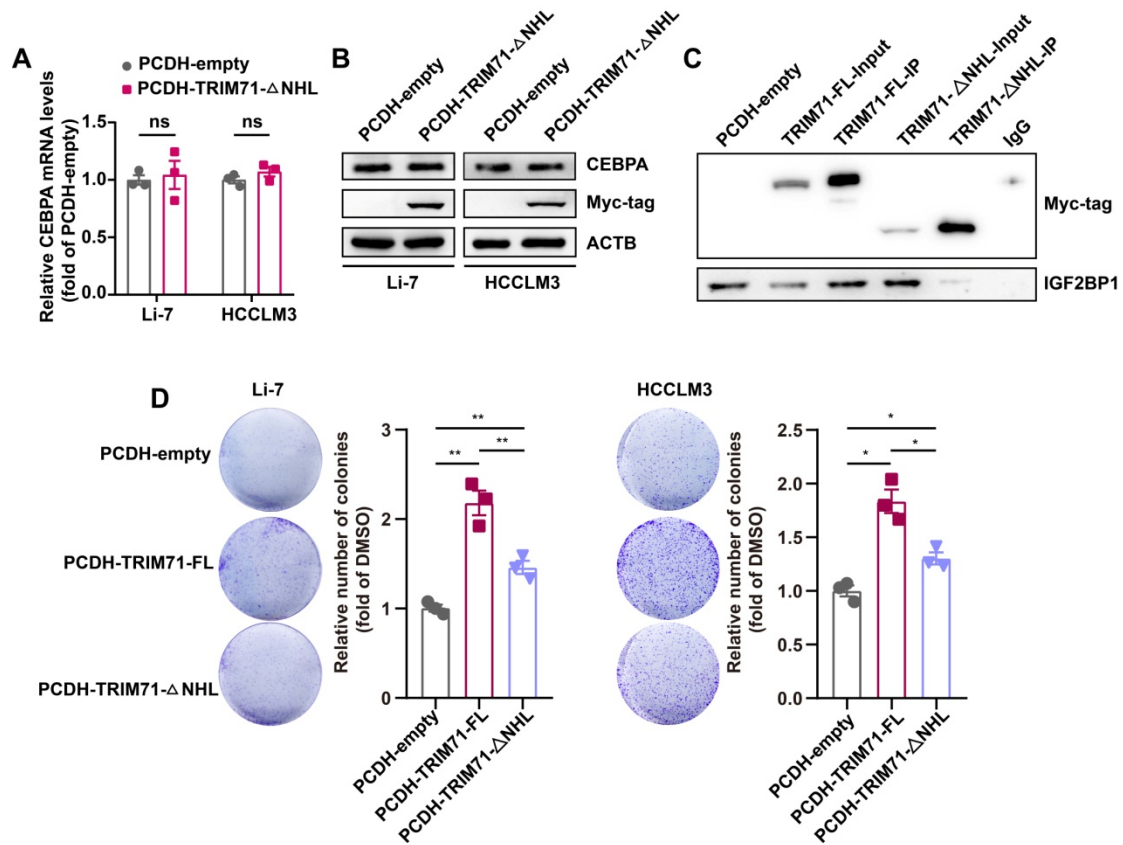

**Figure S8. The NHL domain of TRIM71 in regulation of mRNA expression of CEBPA.** (A-B) The mRNA levels (A) and protein levels (B) of CEBPA in Li-7 and HCCLM3 liver cancer cells infected with PCDH-empty or PCDH-TRIM71-NHL deletion lentiviruses. (C) Immunoblot analysis of myc-tag and IGF2BP1 protein levels in HuH-7 liver cancer cells transfected with PCDH-empty, PCDH-TRIM71-FL and PCDH-TRIM71-NHL deletion plasmids and performed with protein immunoprecipitation experiments. (D) The colony formation assay of Li-7 and HCCLM3 liver cancer cells infected with PCDH-empty, PCDH-TRIM71-FL, or PCDH-TRIM71-NHL deletion lentiviruses. Values represent the mean  $\pm$  SEM. \* $P < 0.05$ , \*\* $P < 0.01$ .

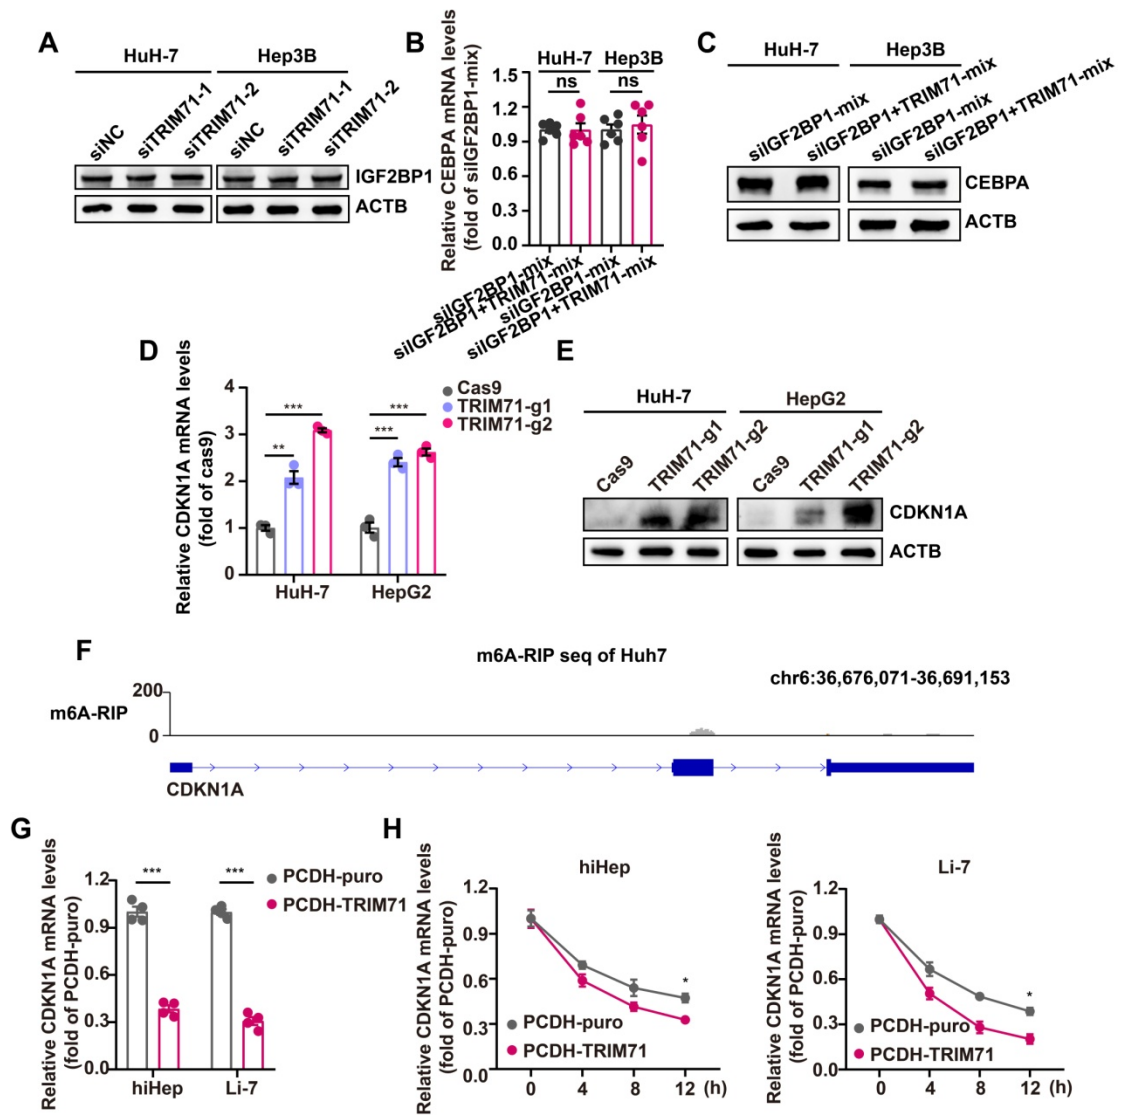

**Figure S9. TRIM71 regulates mRNA stability of CEBPA and CDKN1A.** (A) Assessment IGF2BP1 protein levels in HuH-7 and Hep3B cells with or without TRIM71 knockdown by immunoblot analysis.  $\beta$ -actin (ACTB) is used as a loading control. (B) RT-qPCR analysis of CEBPA mRNA expression in IGF2BP1 knockdown HuH-7 and Hep3B cells that were transfected with the control or TRIM71 siRNA. (C) Immunoblot analysis of CEBPA protein levels in IGF2BP1 knockdown HuH-7 and Hep3B cells that were transfected with the control or TRIM71 siRNA. (D) The mRNA levels of CDKN1A in HuH-7 and HepG2 liver cancer cells infected with Cas9 and TRIM71 gRNAs. (E) The protein levels of CDKN1A in HuH-7 and HepG2 liver cancer cells infected with Cas9 and TRIM71 gRNAs. (F) m6A-RIP seq reveals no m6A modification signal in CDKN1A mRNA of HuH-7 liver cancer cells. (G-H) The mRNA levels (G) and RNA stability (H) of CDKN1A in hiHep normal liver cells

and Li-7 liver cancer cells infected with control or TRIM71 overexpression lentiviruses. The Values represent the mean  $\pm$  SEM. \*\*P < 0.01, \*\*\*P < 0.001.

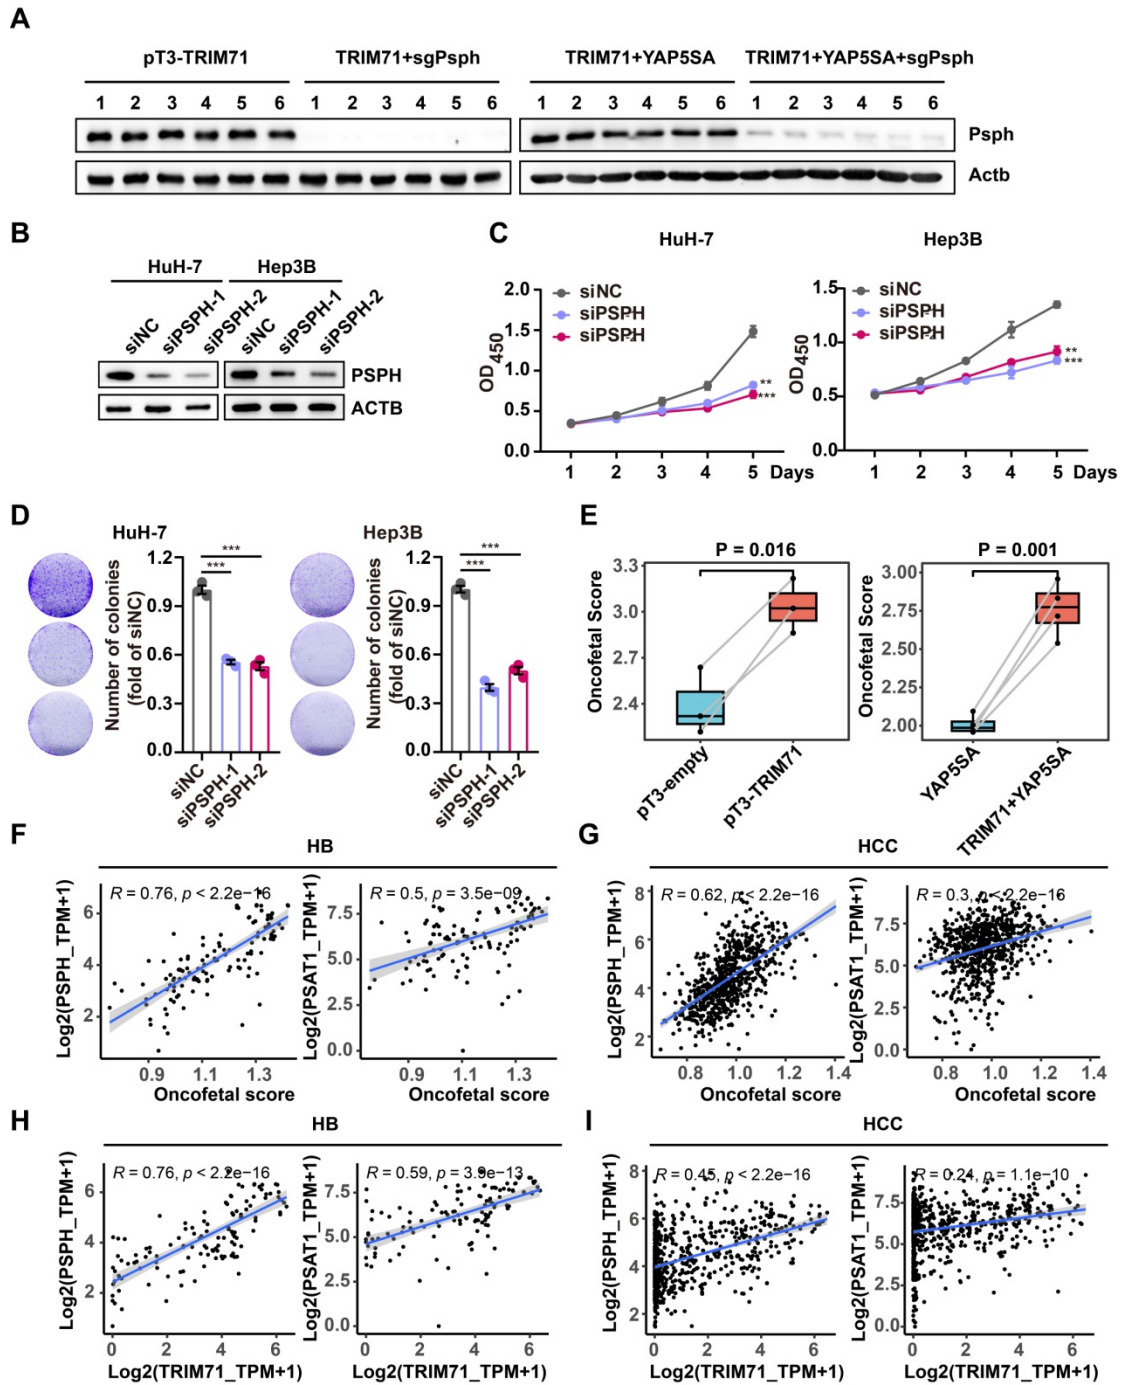

**Figure S10. PSPH promotes liver cancer cell growth and exhibits higher oncofetal features.** (A) Immunoblot confirming the knockdown efficiency of PspH protein levels in pT3-TRIM71, TRIM71 + sgPspH, TRIM71 + YAP5SA or TRIM71 + YAP5SA + sgPspH mice tumors using western blot assay. (B) Immunoblot confirming the knockdown efficiency of siRNA against PSPH in HuH-7 and Hep3B cells. (C-D) CCK-8 assay (C) and colony formation assay (D) in HuH-7 and Hep3B liver cancer cells transfected with siNC or PSPH siRNAs. (E) The difference of oncofetal score in control and TRIM71 induced liver cancer mice models. (F-G) The

correlation of between PSPH or PSAT1 mRNA levels with oncofetal score in HB (F) and HCC (G) tissues from Gepliver database. (H-I) The expressional correlation of between PSPH or PSAT1 mRNA levels with TRIM71 mRNA levels in HB (H) and HCC (I) tissues from Gepliver database. The Values represent the mean  $\pm$  SEM. \*\*P < 0.01, \*\*\*P < 0.001.

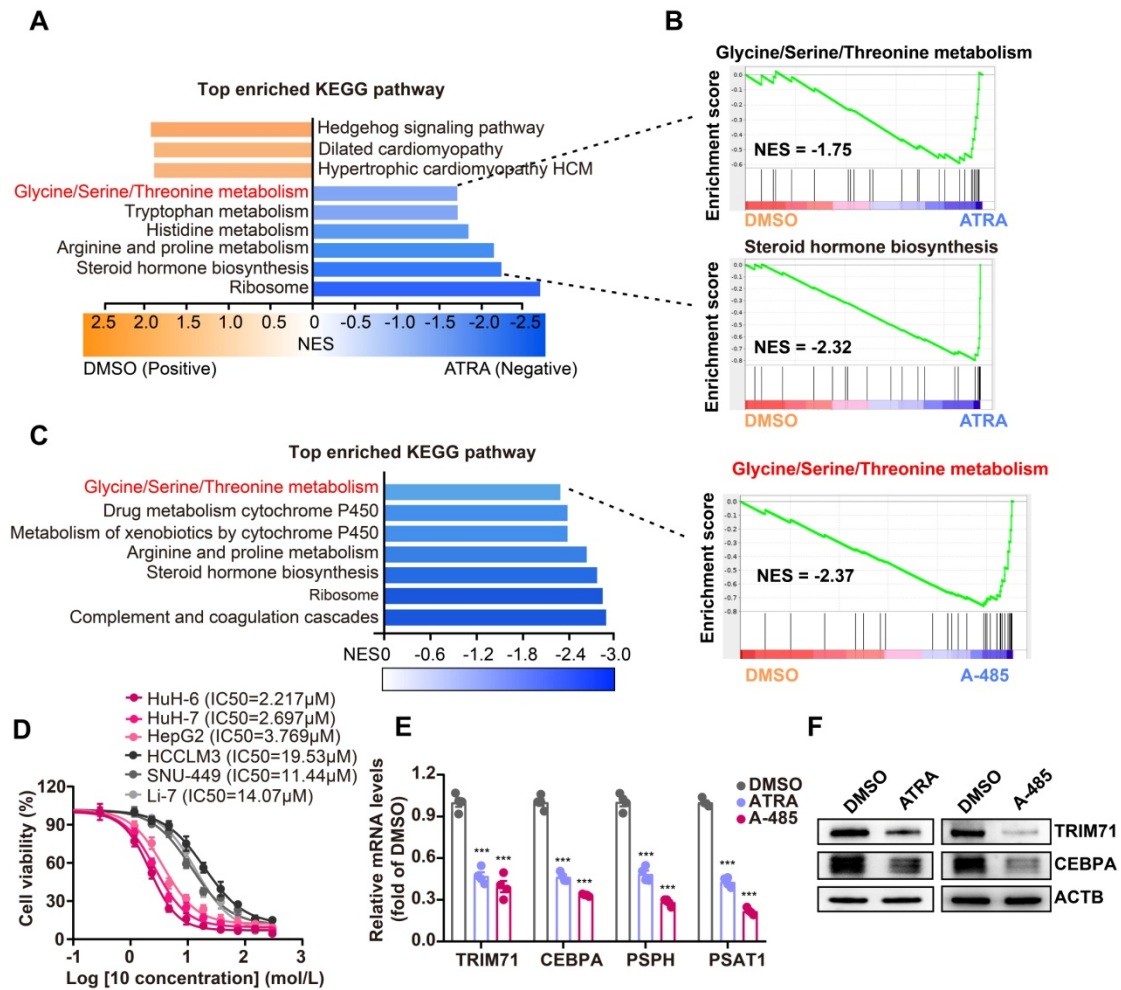

**Figure S11. ATRA combined with A-485 exert anti-tumor ability in high TRIM71 liver cancer patients.** (A) Top enriched KEGG pathway analysis of differentially expressed genes in HuH-7 cells treated with DMSO or ATRA. (B) GSEA analysis displaying down-regulated pathways including Glycine/Serine/Threonine metabolism in HuH-7 cells treated with DMSO or ATRA. (C) Top enriched KEGG pathway analysis including Glycine/Serine/Threonine metabolism differentially expressed genes in HuH-6 cells treated with DMSO or A-485. (D) The IC<sub>50</sub> value of A-485 in liver cancer cell lines. (E) Relative mRNA levels of TRIM71, CEBPA, PSPH, PSAT1 in HuH-7 cells treated with DMSO, ATRA or A-485. (F) Protein levels of TRIM71 and CEBPA in HuH-7 cells treated with DMSO, ATRA or A-485. Values represent the mean  $\pm$  SEM. \*\*\*P < 0.001.



**Table S1. Oncofetal genes in liver cancer**

| Gene     | RBP | TF  |
|----------|-----|-----|
| DLK1     |     |     |
| AFP      | Yes |     |
| PEG3     |     | Yes |
| BEX1     |     |     |
| COL2A1   |     |     |
| GPC3     |     |     |
| HBB      | Yes |     |
| DUSP9    | Yes |     |
| IGF2BP1  | Yes |     |
| RBP2     |     |     |
| PEG10    | Yes |     |
| RHBG     |     |     |
| HMGA2    |     | Yes |
| TRIM71   | Yes |     |
| PNMA3    |     |     |
| IGF2     |     |     |
| SULT1E1  |     |     |
| NKD1     |     |     |
| TOP2A    | Yes |     |
| ARID3A   |     | Yes |
| FKBP10   | Yes |     |
| TSPAN18  |     |     |
| IGSF1    |     |     |
| CACNB4   |     |     |
| CDCA7    |     |     |
| GREB1    |     |     |
| SOAT2    |     |     |
| NOTUM    |     |     |
| ASPM     | Yes |     |
| ROB1     | Yes |     |
| LIN28B   | Yes | Yes |
| MYH7B    |     |     |
| SMLR1    |     |     |
| CENPF    | Yes |     |
| GNG4     |     |     |
| AURKB    |     |     |
| SLC29A4  |     |     |
| PLPPR1   |     |     |
| LGR5     |     |     |
| SERPINI1 |     |     |
| ZNF711   |     | Yes |
| SLC2A1   | Yes |     |
| IGF2BP2  | Yes |     |
| SALL4    |     | Yes |
| FIGN     |     |     |
| SOBP     |     |     |
| GPAM     |     |     |
| HIF3A    |     | Yes |
| TBX3     |     | Yes |

|          |     |     |
|----------|-----|-----|
| PLAG1    |     | Yes |
| KLB      | Yes |     |
| MDK      |     |     |
| MBNL3    | Yes |     |
| MYH10    | Yes |     |
| PTK7     | Yes |     |
| MKI67    | Yes |     |
| TSPAN5   |     |     |
| MSI1     | Yes |     |
| RRM2     | Yes |     |
| CDK1     | Yes |     |
| MAP7D2   |     |     |
| C21orf58 |     |     |
| FRAS1    |     |     |
| LEF1     |     | Yes |
| HELLS    | Yes |     |
| IQCA1    |     |     |
| QPRT     | Yes |     |
| FBLN1    |     |     |
| VSNL1    |     |     |
| SLC16A10 |     |     |
| DKK1     |     |     |
| FAM3B    |     |     |
| BCL11A   |     | Yes |
| LINGO1   |     |     |
| ELP1     |     |     |
| SP5      |     | Yes |
| TNFRSF19 |     |     |
| CENPE    | Yes |     |
| ORC6     | Yes |     |
| BMP4     |     |     |
| CCNF     |     |     |
| NT5DC2   | Yes |     |
| CST1     |     |     |
| WRN      |     |     |
| UBE2C    | Yes |     |
| BCAM     |     |     |
| AXIN2    |     |     |
| CCDC88A  | Yes | Yes |
| SMARCA1  | Yes | Yes |
| SPTLC3   |     |     |
| KIZ      | Yes |     |
| RNF43    |     |     |
| HJURP    |     |     |
| ASPSCR1  |     |     |
| DLGAP5   | Yes |     |
| BRCA2    |     |     |
| ANK1     |     |     |
| ESCO2    |     |     |
| TPX2     | Yes |     |
| MAP4K4   | Yes |     |

|          |     |     |
|----------|-----|-----|
| GTSE1    | Yes |     |
| PBK      |     |     |
| PLK1     | Yes |     |
| ADAMTS6  |     |     |
| CCNB1    | Yes |     |
| HMGCR    |     |     |
| MEX3A    | Yes |     |
| ITPR2    | Yes |     |
| GLUD1    | Yes |     |
| CHTF18   | Yes |     |
| PARPBP   |     |     |
| CCNA2    |     |     |
| KNTC1    | Yes |     |
| RFC3     | Yes |     |
| PHYHIPL  |     |     |
| HIC2     |     | Yes |
| ERP27    |     |     |
| SERPINE2 |     |     |
| NRXN3    |     |     |
| DGKD     |     |     |
| KITLG    |     |     |
| DAB1     |     |     |
| PLCG1    | Yes |     |
| PGC      |     |     |
| H2AFY2   |     |     |
| PIF1     |     |     |
| MFAP2    |     |     |
| GDF11    |     |     |
| LRP1     | Yes |     |
| SGO2     |     |     |
| TBCK     |     |     |
| BUB1B    | Yes |     |
| SOX12    |     | Yes |
| CDC25C   |     |     |
| SEMA4G   |     |     |
| SLC25A36 |     |     |
| SPC25    |     |     |
| TMEM245  | Yes |     |
| MDFI     |     |     |
| ZNF334   |     | Yes |
| TRIM24   | Yes |     |
| APCDD1   |     |     |
| UTRN     | Yes |     |
| KIF18B   | Yes |     |
| MYBL2    |     | Yes |
| CLCN5    |     |     |
| DEPDC1   |     |     |
| ETV4     |     | Yes |
| CDCA3    |     |     |
| PCLAF    |     |     |
| PFKM     | Yes |     |

|           |     |     |
|-----------|-----|-----|
| CKAP2     | Yes |     |
| PDE4D     |     |     |
| ARHGAP11A |     |     |
| ZNRF3     |     |     |
| ATAD5     |     |     |
| XRCC2     |     |     |
| RAD51AP1  | Yes |     |
| NSD2      |     | Yes |
| EXTL3     |     |     |
| FOXM1     |     | Yes |
| ZRANB3    |     |     |
| BUB1      | Yes |     |
| CDC20     | Yes |     |
| KIF20B    |     |     |
| LSS       | Yes |     |
| CDCA2     |     |     |
| AURKA     | Yes |     |
| CENPO     |     |     |
| NYNRIN    | Yes |     |
| TRIB2     |     |     |
| FOXQ1     |     | Yes |
| PTCH1     |     |     |
| PRLR      |     |     |
| MMS22L    |     |     |
| MEST      |     |     |
| RMND1     |     |     |
| BIRC5     |     |     |
| KIF15     | Yes |     |
| RERE      |     | Yes |
| SLF2      |     |     |
| KIF18A    |     |     |
| SLC22A23  |     |     |
| NCAPG     | Yes |     |
| PGAP1     |     |     |
| CCND2     |     |     |
| USP51     |     |     |
| TET1      |     |     |
| PFAS      | Yes |     |
| DNMT3A    |     |     |
| CENPK     | Yes |     |
| BRIP1     |     |     |
| RACGAP1   | Yes |     |
| HMMR      |     |     |
| CEP126    |     |     |
| ATP8B2    |     |     |
| SYNE3     |     |     |
| DIAPH3    | Yes |     |
| PRC1      | Yes |     |
| TYW5      |     |     |

**Table S2. RNA-seq of TRIM71 in HuH-7 cells.**

| GeneID      | siNC        | siTRIM71       | Fold change |
|-------------|-------------|----------------|-------------|
| KRTAP20-2   |             | 0.1 2.77903944 | 27.79039435 |
| SLC16A14    | 0.169019737 | 4.26110013     | 25.21066605 |
| MAB21L2     | 0.20962398  | 4.41026388     | 21.03892826 |
| INSL4       |             | 0.1 1.56628402 | 15.66284023 |
| CRLF1       | 0.228350444 | 3.35222927     | 14.68019594 |
| TUBA1A      | 4.587029937 | 67.0917831     | 14.62641056 |
| GPRC5A      | 0.163882596 | 2.33268948     | 14.23390608 |
| KLRC2       | 0.497770747 | 6.61658241     | 13.2924292  |
| COL7A1      | 1.96507294  | 24.8928249     | 12.66763407 |
| SGK2        | 0.128636679 | 1.62629426     | 12.64253918 |
| SNCG        | 0.687987993 | 8.06316903     | 11.71992698 |
| COTL1       | 6.399453616 | 73.1937021     | 11.43749239 |
| BTC         |             | 0.1 1.09836079 | 10.9836079  |
| GIPR        | 0.493220075 | 5.40300428     | 10.95455062 |
| LOC283278   | 0.183392528 | 1.9944636      | 10.87538094 |
| CDKN2B      | 2.126706353 | 22.774599      | 10.70885924 |
| KLRC3       | 0.988435516 | 10.398489      | 10.52014906 |
| ANXA1       | 23.23694445 | 240.098301     | 10.3326107  |
| SPP1        | 3.296808438 | 34.0063724     | 10.31493733 |
| ACSL5       | 1.105544683 | 11.2235999     | 10.15209979 |
| EMP1        |             | 0.1 0.98912771 | 9.891277099 |
| PLEK2       | 0.490919255 | 4.36955737     | 8.900765927 |
| KLRK1       | 0.176412536 | 1.56883521     | 8.892991654 |
| KLRC4-KLRK1 | 0.162362363 | 1.43497897     | 8.838125706 |
| DUSP13      | 0.564267172 | 4.94396361     | 8.761742404 |
| IGFBP3      | 3.330469948 | 28.9713084     | 8.698864996 |
| SLCO2A1     | 0.28688773  | 2.4865845      | 8.667448079 |
| LUM         | 4.116713815 | 35.2460601     | 8.56169791  |
| C10orf107   | 0.156317032 | 1.33017117     | 8.509444904 |
| TXNIP       | 0.180012864 | 1.51569801     | 8.419942749 |
| CD52        |             | 0.1 0.83527696 | 8.352769618 |
| MFSD14A     | 0.162437189 | 1.35474929     | 8.340142404 |
| IBSP        | 0.13815824  | 1.13356028     | 8.204796745 |
| CGB8        |             | 0.1 0.81763221 | 8.176322095 |
| AKAP12      | 1.519495109 | 12.3836447     | 8.149841787 |
| ADAM28      | 0.193819523 | 1.56808952     | 8.090462202 |
| KIAA0319    | 0.126410859 | 1.01536437     | 8.032255968 |
| HIST1H2BL   |             | 0.1 0.80258253 | 8.025825274 |
| C15orf65    | 0.261462128 | 2.07507907     | 7.936442217 |
| BHLHE40     | 5.040794326 | 39.2501671     | 7.786504373 |
| CTGF        | 46.09852141 | 352.02086      | 7.636272263 |
| C1QTNF9B-A  |             | 0.1 0.75976344 | 7.59763443  |
| CLDN4       | 0.332096298 | 2.50455129     | 7.541641695 |
| VCAN        | 1.429981861 | 10.6355125     | 7.437515643 |

|             |             |            |             |
|-------------|-------------|------------|-------------|
| SBK3        | 0.1         | 0.71807037 | 7.180703728 |
| EREG        | 0.493537772 | 3.53852512 | 7.169714906 |
| NHLRC1      | 0.1         | 0.69656961 | 6.965696062 |
| IL12A       | 0.142071906 | 0.982245   | 6.913717366 |
| NKG7        | 0.1         | 0.67797195 | 6.77971946  |
| AGTR1       | 0.4269374   | 2.89068457 | 6.770745726 |
| MAP1A       | 2.840989648 | 19.1289141 | 6.73318683  |
| SIX1        | 0.190375527 | 1.26473907 | 6.643391015 |
| GRK4        | 0.232844114 | 1.53155674 | 6.577605556 |
| LTC4S       | 0.1         | 0.65669395 | 6.566939516 |
| CPA4        | 0.250858474 | 1.64408535 | 6.553836199 |
| PLK3        | 2.100662553 | 13.481802  | 6.417880853 |
| LOC10537194 | 0.1         | 0.64048743 | 6.404874319 |
| AKR1B10     | 0.650031803 | 4.12493059 | 6.345736588 |
| MYOF        | 1.644246617 | 10.3764166 | 6.310742257 |
| B3GALT2     | 0.185554905 | 1.16149764 | 6.2595901   |
| UBE2E1      | 0.725195363 | 4.4701014  | 6.163996117 |
| SERPINE1    | 34.71788523 | 210.617071 | 6.066529394 |
| GLIPR1      | 0.441851734 | 2.67961258 | 6.064506201 |
| ARL14       | 0.28839336  | 1.74608164 | 6.054514013 |
| HIST1H4H    | 3.18418568  | 19.1054209 | 6.000096368 |
| UCN2        | 0.386173954 | 2.3146726  | 5.993859959 |
| MFNG        | 0.1         | 0.59830889 | 5.983088851 |
| C6orf52     | 1.065837095 | 6.36895228 | 5.975540081 |
| HIST1H3E    | 0.888438445 | 5.26671891 | 5.928062819 |
| EVA1A       | 0.132727634 | 0.78629625 | 5.924133707 |
| CGB5        | 0.1         | 0.5822271  | 5.822270983 |
| ARSI        | 0.540898164 | 3.13162031 | 5.789667114 |
| NSUN3       | 0.523064531 | 3.02024633 | 5.774137129 |
| HIST1H2AL   | 0.487509108 | 2.80867987 | 5.761286971 |
| MNS1        | 0.160019536 | 0.91284943 | 5.704612446 |
| CAV1        | 3.380071368 | 19.2670964 | 5.700204032 |
| LYVE1       | 0.148567808 | 0.84262973 | 5.671684477 |
| WBSCR27     | 0.367915976 | 2.06636293 | 5.61639901  |
| CBR3        | 0.427570649 | 2.3897114  | 5.589044545 |
| VSIG2       | 0.154156789 | 0.85710945 | 5.559985106 |
| C19orf33    | 112.9296118 | 621.730377 | 5.505468121 |
| ZBED8       | 0.266043789 | 1.46012771 | 5.488298451 |
| ESAM        | 7.960760822 | 43.580423  | 5.474404267 |
| LBH         | 0.119640815 | 0.64915541 | 5.425869195 |
| SEMA3C      | 0.264270708 | 1.42253624 | 5.382875213 |
| MEIOB       | 0.196671593 | 1.05728734 | 5.375902666 |
| TGFB2       | 0.834145572 | 4.45656628 | 5.342672103 |
| NTN4        | 0.486258502 | 2.59450809 | 5.335655987 |
| NFIC        | 0.160198077 | 0.84952006 | 5.30293543  |
| SOCS3       | 0.477079256 | 2.52258772 | 5.28756531  |

|           |             |            |             |
|-----------|-------------|------------|-------------|
| HIST1H4A  | 0.1         | 0.5277821  | 5.277821034 |
| SPRY4     | 1.095741674 | 5.76404983 | 5.260409429 |
| SIX4      | 0.129024587 | 0.67483007 | 5.23024401  |
| PLEKHH2   | 0.271860609 | 1.42143194 | 5.228532148 |
| ERMAP     | 0.5730207   | 2.99310347 | 5.223377559 |
| PCDHB5    | 0.993401674 | 5.16486983 | 5.19917569  |
| CHAC2     | 0.528539484 | 2.72104611 | 5.148236212 |
| CD9       | 1.591843938 | 8.1744237  | 5.135191653 |
| FOS       | 0.634515961 | 3.24631953 | 5.116214134 |
| TM4SF19   | 0.501292088 | 2.55439477 | 5.09562155  |
| CYP2C18   | 0.171563568 | 0.8711844  | 5.077910228 |
| ARHGDI1   | 1.060470828 | 5.38002116 | 5.073238246 |
| ZSWIM4    | 0.467094046 | 2.35629193 | 5.044577095 |
| RND1      | 14.42969115 | 72.4833012 | 5.023205305 |
| IL11      | 1.836023421 | 9.20107324 | 5.011413872 |
| EDN1      | 1.545470482 | 7.72837343 | 5.000660655 |
| CLEC2B    | 0.576622259 | 2.85896367 | 4.958122287 |
| CLDN7     | 0.371970056 | 1.84264248 | 4.953738741 |
| CYP2C9    | 0.1         | 0.49464537 | 4.946453715 |
| EPB41L1   | 0.4999671   | 2.46608457 | 4.932493712 |
| C15orf57  | 2.250137342 | 11.0681549 | 4.918879698 |
| FSCN1     | 8.37268192  | 41.0410117 | 4.901776044 |
| FBXL2     | 0.808280536 | 3.95460194 | 4.892610626 |
| HIST4H4   | 0.1         | 0.48624986 | 4.862498603 |
| GNG11     | 0.22727413  | 1.10084869 | 4.843704351 |
| NOXRED1   | 0.158515432 | 0.76466    | 4.823883663 |
| PGM2L1    | 0.773450166 | 3.70487843 | 4.790067399 |
| ZNF117    | 0.204279726 | 0.97800874 | 4.787595717 |
| ZNF596    | 0.113738348 | 0.54414218 | 4.784157572 |
| HIST1H4K  | 0.271496498 | 1.29875663 | 4.783695698 |
| F2R       | 0.577423279 | 2.7509034  | 4.764102008 |
| SNX16     | 0.363497223 | 1.72695832 | 4.750953276 |
| PRSS23    | 14.11156788 | 66.8717755 | 4.738791326 |
| BBOX1     | 0.156082919 | 0.73702979 | 4.722040026 |
| TIGIT     | 0.118720247 | 0.55798935 | 4.700035297 |
| THBS1     | 2.011590296 | 9.42554351 | 4.685617907 |
| CASP7     | 1.157582925 | 5.3887694  | 4.655190815 |
| SERPINE2  | 1.189778793 | 5.51558705 | 4.635808842 |
| CD68      | 3.469130013 | 16.0477906 | 4.625883293 |
| GABARAPL1 | 7.502045633 | 34.621787  | 4.614979524 |
| UBASH3B   | 0.465201445 | 2.13059644 | 4.579943734 |
| KLF4      | 0.690007723 | 3.15755251 | 4.576111841 |
| MLLT11    | 3.278963349 | 14.9958565 | 4.573352895 |
| SCN1B     | 2.122771494 | 9.68111885 | 4.56060338  |
| HACD1     | 4.605621073 | 20.8390858 | 4.524706986 |
| LIF       | 0.52828755  | 2.37201984 | 4.490016541 |

|             |             |            |             |
|-------------|-------------|------------|-------------|
| C6orf99     | 0.906156162 | 4.05534586 | 4.475327798 |
| RGS5        | 0.130666658 | 0.5823083  | 4.456441336 |
| ABLIM3      | 0.319588494 | 1.40919527 | 4.409405519 |
| SLC44A5     | 0.428847649 | 1.87621997 | 4.375026823 |
| ULBP2       | 0.401182368 | 1.75413122 | 4.37240358  |
| SLC22A14    | 0.120297479 | 0.52563676 | 4.369474409 |
| KLF2        | 3.9635457   | 17.3012147 | 4.365085215 |
| TAC3        | 0.37273028  | 1.62510277 | 4.359996657 |
| SYT1        | 0.641152506 | 2.79403406 | 4.357830675 |
| TCTEX1D4    | 0.1         | 0.43414161 | 4.341416114 |
| DUSP5       | 11.98739372 | 52.0118997 | 4.338883077 |
| PLK2        | 1.532741788 | 6.58348304 | 4.295232954 |
| C8orf4      | 1.320130977 | 5.66093498 | 4.288161613 |
| ME3         | 0.76263878  | 3.26859282 | 4.285899047 |
| ARHGAP25    | 1.031193388 | 4.41576369 | 4.28218775  |
| MICALL2     | 4.905780697 | 20.9952092 | 4.279687676 |
| ERICH5      | 0.609178634 | 2.59824748 | 4.265165155 |
| TRAM1L1     | 0.189851643 | 0.80656857 | 4.248414983 |
| DEFB133     | 0.42639656  | 1.81112841 | 4.247521161 |
| C1S         | 1.050277286 | 4.45908594 | 4.245627319 |
| OLFM2       | 8.128482409 | 34.4912233 | 4.243254963 |
| SERPINI1    | 2.620607767 | 11.1118694 | 4.240187935 |
| MSANTD3-T1  | 1.247349618 | 5.28681407 | 4.238438035 |
| CCDC159     | 2.744703469 | 11.6195212 | 4.233434075 |
| ADRB1       | 0.14242471  | 0.60042435 | 4.215731573 |
| SPOCK2      | 2.073603513 | 8.72215236 | 4.206277769 |
| ERICH2      | 1.032018553 | 4.34022875 | 4.205572404 |
| OXCT1       | 0.407132008 | 1.71013432 | 4.200441851 |
| SATB1       | 0.338077491 | 1.41522027 | 4.186082505 |
| C17orf97    | 0.1         | 0.41728917 | 4.172891729 |
| WDR78       | 0.510201083 | 2.12640649 | 4.167781222 |
| C4orf32     | 1.433079688 | 5.96206231 | 4.160314575 |
| CYP2S1      | 0.817226588 | 3.39509599 | 4.154412054 |
| UGDH        | 11.06385967 | 45.9062917 | 4.149211314 |
| ITGA2       | 0.437702838 | 1.81004679 | 4.13533254  |
| PNMA1       | 4.533213668 | 18.6848098 | 4.121758016 |
| LOC10537130 | 0.1         | 0.41136328 | 4.113632812 |
| AXL         | 4.580897529 | 18.8145198 | 4.107168887 |
| KRTAP20-1   | 0.1         | 0.41020457 | 4.102045662 |
| TAF13       | 2.204324445 | 9.01744045 | 4.090795468 |
| RIN2        | 0.433635581 | 1.76578939 | 4.072058346 |
| GLCCI1      | 1.61964356  | 6.59507796 | 4.071931702 |
| TNFRSF10A   | 0.620369373 | 2.52491341 | 4.070016214 |
| CLCF1       | 5.538170705 | 22.504449  | 4.063516675 |
| C8orf48     | 0.14198462  | 0.57689125 | 4.063054526 |
| SLC10A4     | 0.443964647 | 1.80304943 | 4.061245513 |



|             |             |            |             |
|-------------|-------------|------------|-------------|
| SPANXB1     | 0.358890236 | 1.45722765 | 4.060371417 |
| DNAAF3      | 0.126190578 | 0.51191098 | 4.056649781 |
| TMSB4X      | 113.2189809 | 459.289063 | 4.056643676 |
| AQP3        | 1.851243084 | 7.50911675 | 4.05625648  |
| VPREB3      | 0.203777368 | 0.82540145 | 4.050505979 |
| FRMD3       | 0.361821068 | 1.45829466 | 4.030430465 |
| SUMF2       | 10.88362949 | 43.8587118 | 4.029787289 |
| KIF3C       | 1.195480851 | 4.81749691 | 4.029756652 |
| UGT2B11     | 1.157661328 | 4.65903436 | 4.024522754 |
| ELF1        | 1.044503211 | 4.20089249 | 4.021904807 |
| CAPN8       | 0.275100256 | 1.10538489 | 4.018116527 |
| RAET1G      | 0.111351862 | 0.44715302 | 4.015676129 |
| GPSM3       | 0.191984485 | 0.76975986 | 4.009489923 |
| CLPSL2      | 0.1         | 0.39912583 | 3.991258317 |
| PTHLH       | 0.304409967 | 1.21283177 | 3.984205172 |
| PFKP        | 0.437276446 | 1.73923725 | 3.977431831 |
| HIST1H4B    | 0.1         | 0.39717076 | 3.971707609 |
| YY1         | 0.887939275 | 3.52550683 | 3.970436867 |
| TTC39A      | 1.498746195 | 5.93713682 | 3.961402428 |
| EHD2        | 0.1         | 0.39600994 | 3.960099376 |
| TEX15       | 0.292996466 | 1.15934303 | 3.956849873 |
| NEK11       | 0.279402365 | 1.10321477 | 3.948480422 |
| CYTH3       | 1.974680446 | 7.77959333 | 3.939672034 |
| MAP1LC3B2   | 0.532757965 | 2.09863981 | 3.939199307 |
| EEF1A2      | 5.87756064  | 23.1469473 | 3.938189453 |
| LTBP1       | 2.507671009 | 9.8390216  | 3.923569545 |
| FOSL2       | 1.265224292 | 4.95666664 | 3.917618932 |
| RHOBTB1     | 0.490692226 | 1.91506919 | 3.902790978 |
| PPP1R1C     | 0.783198302 | 3.05154942 | 3.89626664  |
| LOC10537886 | 0.143488367 | 0.55597405 | 3.874697713 |
| MAP3K7CL    | 0.396145172 | 1.53491966 | 3.874639318 |
| GPC1        | 1.961151087 | 7.59767634 | 3.87409027  |
| FBN1        | 0.203821736 | 0.789426   | 3.873119796 |
| UCN3        | 0.527533523 | 2.04249226 | 3.87177718  |
| PIGB        | 0.818458701 | 3.16632342 | 3.868641656 |
| C9orf43     | 0.324435343 | 1.252086   | 3.859277434 |
| LMCD1       | 13.79737055 | 53.2390322 | 3.858636108 |
| ZFP36       | 4.431461204 | 17.0852935 | 3.855453704 |
| ELK3        | 0.680074614 | 2.62183083 | 3.855210552 |
| QPCT        | 0.95556914  | 3.68201573 | 3.8532175   |
| CALCOCO1    | 4.06139241  | 15.5514415 | 3.829091091 |
| IL15        | 2.353953972 | 9.00504924 | 3.825499288 |
| ITGAV       | 9.051517327 | 34.3269477 | 3.792397056 |
| RAB27B      | 0.178264484 | 0.67442032 | 3.783256769 |
| SLC10A7     | 0.487600739 | 1.84349783 | 3.780752743 |
| LGR5        | 0.639817864 | 2.4123056  | 3.77030049  |

|             |             |            |             |
|-------------|-------------|------------|-------------|
| CYB5R4      | 1.153707454 | 4.34926415 | 3.769815421 |
| ZNF229      | 0.188417637 | 0.70838045 | 3.759629174 |
| LPXN        | 0.370375774 | 1.3902342  | 3.753577588 |
| DKK3        | 9.338441775 | 34.9251831 | 3.739936908 |
| COL12A1     | 0.425071693 | 1.5888694  | 3.737885689 |
| IQCG        | 0.35594334  | 1.32996372 | 3.736447831 |
| OSBPL10     | 0.530565675 | 1.98102769 | 3.733802958 |
| FRRS1       | 0.189608502 | 0.7067876  | 3.727615562 |
| LOC728715   | 0.943191114 | 3.50740328 | 3.718655984 |
| RASSF2      | 0.142798562 | 0.53004391 | 3.71182943  |
| LOC10537135 | 0.172880865 | 0.64127531 | 3.709348145 |
| G3BP2       | 4.806927613 | 17.8216279 | 3.707488295 |
| S100A3      | 1.90977605  | 7.07203677 | 3.703071244 |
| PKIB        | 1.529538442 | 5.65430911 | 3.696742074 |
| GABRR1      | 0.620954118 | 2.29462838 | 3.695326782 |
| CCDC74A     | 0.199091012 | 0.7349236  | 3.691395166 |
| GOLM1       | 24.4586117  | 89.8882496 | 3.675116588 |
| AGR2        | 2.826996529 | 10.3754174 | 3.670120316 |
| RAB30       | 0.299345481 | 1.09756233 | 3.666540483 |
| SPERT       | 0.528395486 | 1.93589819 | 3.663729624 |
| CNR1        | 0.268059352 | 0.98104829 | 3.659817444 |
| IKBKG       | 0.77186543  | 2.82386798 | 3.658497809 |
| QRFP        | 0.230278455 | 0.8398978  | 3.647313855 |
| C11orf70    | 0.431445461 | 1.57213095 | 3.643869489 |
| HPS3        | 0.438174978 | 1.59024407 | 3.629244368 |
| DCAF12L2    | 0.123358892 | 0.44696602 | 3.623297909 |
| ZNF680      | 0.250478613 | 0.90349048 | 3.607056404 |
| SLC25A53    | 0.14876286  | 0.53458539 | 3.593540662 |
| TLDC1       | 1.705134671 | 6.12547765 | 3.592371765 |
| LMBRD1      | 2.914533945 | 10.4653754 | 3.590754325 |
| COL1A1      | 1.144777382 | 4.10947383 | 3.589758058 |
| TTC5        | 1.038477104 | 3.71927374 | 3.581469183 |
| DMTF1       | 0.273093785 | 0.97719318 | 3.578232956 |
| BBS9        | 0.463803807 | 1.65956217 | 3.578155561 |
| PANX2       | 2.168746745 | 7.747376   | 3.572282482 |
| ZNF543      | 0.149612988 | 0.53349208 | 3.565813938 |
| CSNK1G3     | 0.751968366 | 2.68020437 | 3.564251494 |
| RGS20       | 1.138266683 | 4.05632398 | 3.563597217 |
| SRD5A1      | 1.279454897 | 4.55945088 | 3.563588595 |
| NLRP1       | 2.879691498 | 10.2591581 | 3.562589291 |
| SMPX        | 0.1         | 0.35576172 | 3.557617204 |
| MUC13       | 0.1421742   | 0.50534546 | 3.554410443 |
| CD44        | 1.921716462 | 6.81853735 | 3.548149522 |
| ALPK1       | 0.130871986 | 0.46415319 | 3.546619876 |
| PRKD1       | 0.333439222 | 1.18102435 | 3.541947887 |
| C3orf52     | 1.785515194 | 6.31812629 | 3.538545237 |

|             |             |            |             |
|-------------|-------------|------------|-------------|
| KIF3A       | 0.453909111 | 1.60434797 | 3.534513689 |
| SUSD1       | 5.495243844 | 19.3272599 | 3.517088685 |
| SPACA6      | 5.357799419 | 18.748474  | 3.499286279 |
| AK9         | 0.302169314 | 1.05682635 | 3.497464175 |
| TNFRSF11B   | 0.229389941 | 0.80093538 | 3.491588946 |
| ELMO1       | 0.132881257 | 0.46391213 | 3.491178053 |
| LOC10272389 | 0.194711014 | 0.67927436 | 3.488628332 |
| KLF7        | 0.445555377 | 1.55302865 | 3.485601851 |
| RASSF6      | 0.128395585 | 0.44734786 | 3.484137433 |
| PRH1-TAS2R  | 0.135399277 | 0.47116022 | 3.479783834 |
| SFR1        | 1.88386097  | 6.53898611 | 3.471055568 |
| TRIM68      | 0.49845308  | 1.72996212 | 3.470661909 |
| HIST1H2BF   | 0.1         | 0.34672084 | 3.46720841  |
| LCP1        | 6.267086462 | 21.7238774 | 3.466343976 |
| ARFGEF3     | 0.365161565 | 1.26554957 | 3.465725016 |
| TGFB1       | 87.58034363 | 302.59809  | 3.455091381 |
| SMOX        | 52.08093547 | 179.763327 | 3.451614791 |
| TSPAN12     | 0.431359315 | 1.4855804  | 3.443951118 |
| TIMP2       | 7.524695711 | 25.8750714 | 3.438686743 |
| PHACTR2     | 0.805854162 | 2.77069612 | 3.438210344 |
| MAFK        | 2.973940429 | 10.2223736 | 3.437316189 |
| ARHGAP21    | 1.347371365 | 4.63073524 | 3.436866301 |
| JRKL        | 0.185027675 | 0.63490737 | 3.431418398 |
| HIST2H2AA3  | 0.782132137 | 2.68271442 | 3.430001522 |
| FLRT2       | 0.52313704  | 1.79402104 | 3.429351971 |
| LOC10798399 | 0.139294343 | 0.47766653 | 3.429188287 |
| ITGB5       | 35.63877289 | 121.958127 | 3.422063031 |
| ASMTL       | 0.479605468 | 1.63993915 | 3.419350398 |
| ASPH        | 14.1622718  | 48.4095178 | 3.418202849 |
| ARHGAP11B   | 0.189542419 | 0.64766204 | 3.416976772 |
| MAPK13      | 0.779015907 | 2.65698868 | 3.410698877 |
| CNGB3       | 0.197761289 | 0.67352521 | 3.405748502 |
| FHL2        | 4.662940401 | 15.8777715 | 3.405098524 |
| MEF2C       | 0.392281809 | 1.33571162 | 3.404979762 |
| TMEM107     | 0.373467388 | 1.26483911 | 3.386745791 |
| RBM24       | 0.460161722 | 1.55544256 | 3.380208489 |
| LGALS1      | 45.4691219  | 153.626244 | 3.378693877 |
| CBLB        | 1.477994558 | 4.9917998  | 3.377414196 |
| BCAR3       | 1.282109379 | 4.31999013 | 3.369439613 |
| PDP1        | 0.239242569 | 0.80564424 | 3.367478632 |
| LRP10       | 14.13089538 | 47.5794799 | 3.367053442 |
| SSFA2       | 2.240276293 | 7.53528799 | 3.363552975 |
| KIAA0586    | 1.096066666 | 3.67794286 | 3.355583168 |
| SSBP2       | 0.637254515 | 2.13417331 | 3.34901245  |
| LAT2        | 0.377086993 | 1.26209908 | 3.346970593 |
| PLSCR4      | 0.223789199 | 0.74896277 | 3.346733325 |

|             |             |            |             |
|-------------|-------------|------------|-------------|
| DZANK1      | 0.235968108 | 0.78905014 | 3.343884686 |
| STAC3       | 0.622159635 | 2.0770205  | 3.33840446  |
| SNCAIP      | 0.431857228 | 1.43557016 | 3.324177692 |
| IL31RA      | 0.533534363 | 1.77194227 | 3.321139913 |
| WRB-SH3BG   | 0.357244747 | 1.18637319 | 3.320897523 |
| CTTNBP2NL   | 0.336665167 | 1.11594624 | 3.314706575 |
| GAD1        | 0.187327043 | 0.61885194 | 3.303591044 |
| JKAMP       | 1.462408764 | 4.80749405 | 3.287380495 |
| ANKRD44     | 0.295690642 | 0.97201913 | 3.287284052 |
| ACO2        | 5.004630876 | 16.4228726 | 3.281535241 |
| JUNB        | 31.95925193 | 104.729472 | 3.27696882  |
| DDX60L      | 0.280658207 | 0.91931457 | 3.275566316 |
| CDK6        | 0.807955629 | 2.64601564 | 3.274951677 |
| KAT2B       | 0.85509652  | 2.79403406 | 3.267507226 |
| FAM161A     | 0.236398563 | 0.77172974 | 3.264528059 |
| VLDLR       | 0.514479683 | 1.67937834 | 3.264226744 |
| GAP43       | 0.118116908 | 0.38493275 | 3.258913206 |
| RCAN2       | 0.135523558 | 0.44142469 | 3.257180476 |
| CEACAM1     | 1.359395424 | 4.42620332 | 3.256008697 |
| TLE6        | 0.160198077 | 0.52078319 | 3.250870426 |
| C12orf60    | 0.661515737 | 2.14907162 | 3.248708233 |
| CFAP53      | 0.198395073 | 0.64449197 | 3.248528095 |
| CCDC191     | 0.341604175 | 1.10859349 | 3.245257434 |
| ATG4A       | 1.898511659 | 6.15879142 | 3.244010324 |
| KATNAL1     | 0.555401719 | 1.801391   | 3.243401922 |
| NOG         | 0.1         | 0.32429167 | 3.242916736 |
| MAFF        | 1.527885683 | 4.93987051 | 3.233141437 |
| GNG3        | 0.1         | 0.32311243 | 3.231124325 |
| HLTF        | 0.858447499 | 2.77054723 | 3.227392751 |
| PDE5A       | 1.003393199 | 3.23457964 | 3.223641182 |
| CHN1        | 1.615939316 | 5.20896962 | 3.223493335 |
| RGS2        | 4.731929855 | 15.2276427 | 3.218061794 |
| BICD2       | 1.689657064 | 5.41607273 | 3.205427215 |
| EMSY        | 0.403001715 | 1.291361   | 3.204356092 |
| HECA        | 0.629225805 | 2.01569669 | 3.203455222 |
| NR2F1       | 5.767112812 | 18.4693858 | 3.202535896 |
| HABP4       | 18.73816782 | 60.0028826 | 3.202174468 |
| KISS1R      | 0.39887882  | 1.27515034 | 3.196836436 |
| NEDD9       | 0.441614406 | 1.41120029 | 3.19554858  |
| ETV1        | 0.412017857 | 1.31512731 | 3.19191824  |
| LOC10099663 | 0.128900235 | 0.41143515 | 3.191888255 |
| NELL2       | 0.394946204 | 1.25968784 | 3.18951753  |
| ACRC        | 0.214618805 | 0.68419582 | 3.187958412 |
| RCAN3       | 1.365695936 | 4.35198804 | 3.186644936 |
| ZCCHC11     | 0.66212741  | 2.10848224 | 3.184405619 |
| HEY1        | 0.284368035 | 0.90545524 | 3.184096408 |

|           |             |            |             |
|-----------|-------------|------------|-------------|
| SPHK1     | 4.380816427 | 13.9441571 | 3.183004199 |
| PCDHB3    | 0.607889796 | 1.93423804 | 3.181889311 |
| CCDC68    | 1.186422475 | 3.77321789 | 3.180332445 |
| CFI       | 0.943569058 | 3.00071164 | 3.180171724 |
| TIMP4     | 6.382883944 | 20.272035  | 3.175999303 |
| CD55      | 0.662513221 | 2.10238431 | 3.173346956 |
| FGF18     | 0.191891665 | 0.60850385 | 3.171080158 |
| MYC       | 13.95598923 | 44.2443648 | 3.170277944 |
| TMEM156   | 0.462110869 | 1.46376442 | 3.16756111  |
| PCED1B    | 2.544178894 | 8.05873681 | 3.167519715 |
| FOSB      | 0.24470017  | 0.7743006  | 3.164283063 |
| KITLG     | 0.836146275 | 2.64358626 | 3.161631326 |
| NCK1      | 0.672347908 | 2.12416313 | 3.159321393 |
| LYPD6     | 0.351539343 | 1.10841055 | 3.153019929 |
| MMP24     | 0.478297606 | 1.50784048 | 3.152515212 |
| KCTD1     | 0.276944798 | 0.87302508 | 3.152343295 |
| RHOH      | 0.180303916 | 0.56776879 | 3.148954299 |
| AMIGO2    | 8.319861101 | 26.1629423 | 3.14463691  |
| OXTR      | 0.483989726 | 1.5194651  | 3.139457355 |
| VIM       | 281.1118861 | 880.801967 | 3.133278993 |
| EPS8      | 2.330882909 | 7.29914732 | 3.131494634 |
| HYPM      | 0.1         | 0.31175641 | 3.117564104 |
| CCSAP     | 0.660729579 | 2.05974352 | 3.117377491 |
| FLNC      | 31.32519951 | 97.6219608 | 3.116403481 |
| IL15RA    | 0.652157892 | 2.02978557 | 3.11241433  |
| GPR157    | 0.187143197 | 0.5822271  | 3.111131525 |
| FAM171A1  | 3.074936213 | 9.56574571 | 3.110876144 |
| CEP290    | 0.678057114 | 2.10226464 | 3.100424126 |
| INTS2     | 0.218112374 | 0.67620196 | 3.100245767 |
| ARRDC3    | 1.967550599 | 6.09988188 | 3.10024143  |
| ZNF671    | 0.493546723 | 1.52973507 | 3.099473662 |
| RANBP6    | 0.336429183 | 1.04108361 | 3.0945104   |
| LOC730183 | 0.621561514 | 1.92285157 | 3.093582101 |
| SMIM14    | 2.792639752 | 8.63444116 | 3.091856425 |
| A4GALT    | 0.348504954 | 1.07708724 | 3.090593783 |
| VNN2      | 1.566097393 | 4.83581241 | 3.087810779 |
| ANKRA2    | 0.486686371 | 1.49973107 | 3.081514416 |
| PPP1R3B   | 0.801601151 | 2.46849415 | 3.079454351 |
| UGT2B15   | 0.314901806 | 0.96843553 | 3.075357168 |
| PRDX4     | 61.66257513 | 189.29687  | 3.069882652 |
| USP50     | 0.405293335 | 1.24321079 | 3.06743459  |
| TUFT1     | 2.981327798 | 9.12790937 | 3.061692638 |
| NIPSNAP3A | 2.330609684 | 7.11635999 | 3.053432771 |
| C8orf88   | 2.117893265 | 6.44726266 | 3.044186772 |
| NABP1     | 2.158478712 | 6.56955485 | 3.043604187 |
| IGFBP7    | 5.423530791 | 16.4974299 | 3.041824687 |

|             |             |            |             |
|-------------|-------------|------------|-------------|
| ZNF211      | 0.893493784 | 2.71627526 | 3.040060609 |
| DACH1       | 0.13876122  | 0.4217413  | 3.039331201 |
| GRIA3       | 1.575869147 | 4.78736277 | 3.037918963 |
| STX12       | 3.215343331 | 9.74767433 | 3.03161228  |
| GABRA2      | 0.308082147 | 0.93382371 | 3.031086752 |
| PLEKHB2     | 5.209420097 | 15.7843606 | 3.029965004 |
| BTBD16      | 0.22389747  | 0.67736034 | 3.025314827 |
| PCMTD1      | 0.605446662 | 1.82972764 | 3.022112019 |
| TBC1D4      | 0.723120706 | 2.18446552 | 3.020886421 |
| SYTL5       | 0.991960398 | 2.99049272 | 3.014729954 |
| FBXL14      | 0.406333653 | 1.21929776 | 3.000730441 |
| DMRTA1      | 0.680197535 | 2.03561181 | 2.992677431 |
| LYPD1       | 2.515384493 | 7.52710902 | 2.992428808 |
| FOSL1       | 12.35970058 | 36.9561247 | 2.990050161 |
| COPG2       | 2.146830339 | 6.41005815 | 2.98582428  |
| TGFB3       | 0.609133328 | 1.81805606 | 2.984660298 |
| BMPR2       | 0.923932529 | 2.75576079 | 2.982642893 |
| LOC10050750 | 5.343349318 | 15.910189  | 2.977568579 |
| KLHL21      | 5.513531358 | 16.3936072 | 2.973340708 |
| BRINP2      | 0.214357919 | 0.6370695  | 2.971989582 |
| ZNF419      | 0.818458701 | 2.43164751 | 2.971008196 |
| SLC38A5     | 1.440305795 | 4.27865629 | 2.970658248 |
| TMEM206     | 1.428495992 | 4.23934821 | 2.967700461 |
| OXR1        | 0.263706053 | 0.7821798  | 2.966104832 |
| MAPRE2      | 3.526597617 | 10.4439553 | 2.961481986 |
| LOC10028956 | 4.065671178 | 12.0236556 | 2.95736057  |
| NEK1        | 0.40882004  | 1.20723605 | 2.952976694 |
| RASSF10     | 0.167857407 | 0.49526811 | 2.950528796 |
| PLEKHA1     | 2.597643245 | 7.66368357 | 2.950244835 |
| CAV2        | 7.448042177 | 21.9359921 | 2.945202455 |
| TTL7        | 0.441351685 | 1.29936612 | 2.944060627 |
| MGARP       | 0.23601888  | 0.69423055 | 2.941419574 |
| TMC7        | 1.813745177 | 5.33493476 | 2.941391563 |
| CIDEC       | 8.071052489 | 23.7070411 | 2.937292393 |
| POLD4       | 59.74044059 | 174.967602 | 2.928796637 |
| KLHDC1      | 0.1         | 0.29268064 | 2.926806423 |
| ZFC3H1      | 0.931175818 | 2.72334775 | 2.924633244 |
| ARNTL       | 0.160168246 | 0.46800284 | 2.921945216 |
| WRN         | 0.670540733 | 1.95555885 | 2.916390835 |
| TMCO3       | 7.562615645 | 22.0521455 | 2.91594159  |
| S100A6      | 529.7771028 | 1544.77295 | 2.915892249 |
| SLC15A1     | 0.546538051 | 1.59279127 | 2.914328235 |
| EID1        | 10.29087797 | 29.9837816 | 2.913627167 |
| CCPG1       | 1.470230165 | 4.27535609 | 2.90795019  |
| TCTEX1D2    | 28.89019558 | 84.0032539 | 2.907673424 |
| GABPB1      | 2.922798022 | 8.49265115 | 2.905657895 |

|             |             |            |             |
|-------------|-------------|------------|-------------|
| TFPI        | 8.353547772 | 24.2338391 | 2.901023587 |
| ZSCAN29     | 0.529077935 | 1.53297262 | 2.897441991 |
| FAM183A     | 1.096330857 | 3.17591245 | 2.896855847 |
| ZNF616      | 0.205849954 | 0.5960618  | 2.895612958 |
| TUBB3       | 70.38501267 | 203.797374 | 2.895465477 |
| CD200R1     | 0.260325071 | 0.75372336 | 2.895316045 |
| BHLHE41     | 0.437276446 | 1.26474429 | 2.892322008 |
| CD72        | 0.320992367 | 0.9275348  | 2.889585229 |
| GJA1        | 15.5983263  | 45.0601825 | 2.888783174 |
| ZNF605      | 0.354959419 | 1.0253526  | 2.88864738  |
| GAREM1      | 0.410579987 | 1.18547353 | 2.887314454 |
| GCNT3       | 3.433299167 | 9.91165037 | 2.886917185 |
| GRAMD3      | 0.319678636 | 0.92261537 | 2.886071389 |
| ANXA8       | 1.195844048 | 3.4512172  | 2.886009431 |
| RUSC2       | 3.309990871 | 9.54946074 | 2.885041414 |
| RASA1       | 0.573794796 | 1.65521036 | 2.884673013 |
| MAP7D3      | 0.976195971 | 2.81430691 | 2.882932317 |
| DPY19L1     | 2.049395971 | 5.90807628 | 2.882837853 |
| TMEM150C    | 0.132155593 | 0.38095858 | 2.882651995 |
| BNIP3L      | 4.193572404 | 12.0881657 | 2.882546073 |
| LOC10272447 | 0.132087611 | 0.38036459 | 2.879638664 |
| PCDHB13     | 0.134661582 | 0.38771186 | 2.879157161 |
| AGA         | 3.015685109 | 8.67598358 | 2.876952756 |
| PPL         | 1.865890421 | 5.36465288 | 2.875116793 |
| GPR19       | 0.166762933 | 0.4791705  | 2.873363359 |
| MXRA8       | 7.006798774 | 20.1285253 | 2.872713485 |
| STK39       | 0.826478645 | 2.37376235 | 2.872139967 |
| AOX1        | 0.469131092 | 1.34710535 | 2.871490227 |
| CDKN1A      | 0.914367186 | 2.62485846 | 2.870683129 |
| RHOB        | 67.43031935 | 193.407077 | 2.868250949 |
| RASSF9      | 0.503713359 | 1.44423837 | 2.867182983 |
| CAT         | 5.722251709 | 16.4055658 | 2.866977316 |
| CDK20       | 0.3257801   | 0.93293772 | 2.863703815 |
| SLC9A6      | 0.780257356 | 2.2307709  | 2.859019378 |
| HIST1H2BD   | 35.23387862 | 100.718438 | 2.858568005 |
| CSAD        | 1.615333248 | 4.61369816 | 2.856189686 |
| SERF1B      | 0.259594533 | 0.74144824 | 2.856178193 |
| KLK14       | 0.460754093 | 1.31580177 | 2.855757089 |
| ITGB1       | 11.06540631 | 31.5020804 | 2.846897755 |
| CEP135      | 0.311716688 | 0.88619414 | 2.842947364 |
| ABCA3       | 0.136666019 | 0.38833147 | 2.841463237 |
| GOLPH3L     | 1.478461916 | 4.19839808 | 2.83970661  |
| THAP2       | 0.413583472 | 1.17405126 | 2.83872868  |
| PARP4       | 2.694069235 | 7.64587471 | 2.838039429 |
| ZNF274      | 2.174408735 | 6.16941003 | 2.837281662 |
| ATP1B1      | 11.11054288 | 31.5170955 | 2.836683662 |

|            |             |            |             |
|------------|-------------|------------|-------------|
| PTGR1      | 227.2784993 | 644.02667  | 2.833645383 |
| PPP2R3C    | 3.337853879 | 9.45612424 | 2.832995265 |
| MORC4      | 4.480213581 | 12.6659707 | 2.827090819 |
| GPR158     | 0.21844918  | 0.61747317 | 2.826621618 |
| CCDC53     | 7.157883456 | 20.22051   | 2.824928638 |
| WWP1       | 0.955462087 | 2.6977214  | 2.823472993 |
| ZSCAN30    | 0.602888028 | 1.69891682 | 2.817964098 |
| GPSM2      | 0.522121706 | 1.47128226 | 2.817891398 |
| TCP11L1    | 0.628818542 | 1.77190484 | 2.81783173  |
| WBP4       | 3.221921372 | 9.0723342  | 2.815814897 |
| C17orf67   | 0.250869185 | 0.70637901 | 2.815726467 |
| LURAP1L    | 3.23704709  | 9.11173094 | 2.814828048 |
| KLHL18     | 2.515030665 | 7.07015089 | 2.811158919 |
| CTAGE4     | 0.423662088 | 1.19079549 | 2.810719973 |
| MIA2       | 0.126615414 | 0.35580657 | 2.810136293 |
| AGBL2      | 0.14641419  | 0.41091604 | 2.806531561 |
| LYRM5      | 0.451329631 | 1.26649842 | 2.806149505 |
| BACH2      | 0.478707717 | 1.34212815 | 2.80364845  |
| ACOT6      | 0.173498499 | 0.48531463 | 2.79722668  |
| USP53      | 0.757605346 | 2.11901311 | 2.796988064 |
| USP15      | 2.03731397  | 5.69803013 | 2.796834563 |
| UBE2E3     | 16.47135506 | 46.0427838 | 2.795324585 |
| SETD7      | 2.03894994  | 5.69430621 | 2.79276411  |
| CSGALNACT1 | 0.470558048 | 1.31415266 | 2.792753558 |
| PTN        | 0.213053557 | 0.59390112 | 2.78756728  |
| ARL13B     | 0.389311624 | 1.08453187 | 2.785768025 |
| SLC38A2    | 27.48402985 | 76.5395117 | 2.784872236 |
| PFKM       | 5.954032467 | 16.5731293 | 2.783513428 |
| CCDC40     | 0.196980448 | 0.54789235 | 2.781455517 |
| AMPD3      | 0.398594841 | 1.1080088  | 2.779787109 |
| PTPN1      | 6.593660486 | 18.3276969 | 2.77959367  |
| LIPT1      | 0.568383907 | 1.57959294 | 2.779095111 |
| PERP       | 12.94190651 | 35.9072116 | 2.774491654 |
| USP54      | 0.625237428 | 1.73421971 | 2.77369785  |
| PHTF1      | 3.19276137  | 8.83597932 | 2.76750383  |
| DPP4       | 5.159146686 | 14.2725308 | 2.766451826 |
| DDHD2      | 3.15547105  | 8.72868025 | 2.766205144 |
| SLC41A3    | 4.493639523 | 12.4297401 | 2.766074148 |
| NPIP3      | 0.301136699 | 0.83226092 | 2.76373129  |
| TCTN1      | 2.690283103 | 7.43199513 | 2.76253273  |
| CNPY3-GNM  | 0.9385326   | 2.59106264 | 2.760759334 |
| EGFR       | 2.60427761  | 7.18529387 | 2.759035304 |
| SYTL2      | 0.523193877 | 1.44282879 | 2.757732563 |
| LVRN       | 0.41530713  | 1.14459928 | 2.756030885 |
| ANGPT1     | 0.517058119 | 1.42399883 | 2.754040177 |
| AKR1C2     | 67.51039378 | 185.889825 | 2.753499339 |



|             |             |            |             |
|-------------|-------------|------------|-------------|
| SVIP        | 5.249243171 | 14.4460015 | 2.752016049 |
| AREG        | 6.427898206 | 17.6846606 | 2.751235318 |
| UCHL1       | 503.7641585 | 1385.21582 | 2.749730804 |
| NPTN        | 19.69206    | 54.1220181 | 2.7484183   |
| PKIA        | 0.215610112 | 0.59244329 | 2.74775279  |
| ATF1        | 0.685282526 | 1.87823884 | 2.740824065 |
| GIP         | 0.52693221  | 1.44291091 | 2.738323602 |
| CHMP3       | 5.197185383 | 14.2253865 | 2.737132784 |
| PLXND1      | 11.63807397 | 31.8494396 | 2.736658975 |
| HSD17B3     | 2.587619444 | 7.07347431 | 2.73358369  |
| C1orf61     | 0.1         | 0.27334961 | 2.733496105 |
| DYSF        | 0.948353051 | 2.5919987  | 2.73315797  |
| EFCAB7      | 0.430597704 | 1.17665555 | 2.732609904 |
| C14orf105   | 0.62889648  | 1.7174263  | 2.730856909 |
| LOC10798426 | 0.1         | 0.27264436 | 2.726443639 |
| TCTE3       | 0.324297144 | 0.88391597 | 2.725636009 |
| FAM72A      | 0.352957334 | 0.96198094 | 2.725487884 |
| KRTAP6-3    | 0.1         | 0.27222396 | 2.722239637 |
| KLF3        | 1.581253277 | 4.30392101 | 2.721841637 |
| ZNF83       | 1.122645783 | 3.05553505 | 2.721726743 |
| QTRT2       | 1.819481408 | 4.94982682 | 2.720460234 |
| LMLN        | 0.312153202 | 0.84888776 | 2.719458775 |
| SP4         | 0.50345413  | 1.36906085 | 2.719335814 |
| CITED2      | 28.19707912 | 76.6535519 | 2.718492633 |
| KIAA0226L   | 0.801846939 | 2.17967253 | 2.718314963 |
| TSPAN7      | 2.587553852 | 7.03168077 | 2.717501228 |
| KIAA1217    | 0.666175311 | 1.80951243 | 2.716270622 |
| ATP8B3      | 0.215880436 | 0.58600097 | 2.714470016 |
| WDR60       | 0.608770011 | 1.65134115 | 2.712586238 |
| TSC22D2     | 0.950106665 | 2.57239058 | 2.707475571 |
| LOC728392   | 4.32894512  | 11.7180233 | 2.706900396 |
| IL4I1       | 0.427888194 | 1.15781432 | 2.70588051  |
| CCDC66      | 0.276430573 | 0.74745399 | 2.703948357 |
| ERO1A       | 2.60020239  | 7.0289525  | 2.703232844 |
| MOK         | 1.990020838 | 5.37947686 | 2.7032264   |
| PCDHB9      | 0.223841306 | 0.60496129 | 2.702634723 |
| AGMO        | 0.238238543 | 0.64353491 | 2.701220798 |
| STX11       | 0.144120465 | 0.38912599 | 2.70000506  |
| GINM1       | 5.84799353  | 15.7886868 | 2.699846838 |
| KIF20A      | 2.618641738 | 7.06874424 | 2.699393405 |
| RNF103-CHM  | 4.149717181 | 11.1870772 | 2.695864979 |
| SAT1        | 58.19048571 | 156.726906 | 2.693342453 |
| BBC3        | 5.139931262 | 13.8289505 | 2.690493284 |
| ZC2HC1A     | 0.232656288 | 0.62499531 | 2.686346093 |
| NEK7        | 1.745444833 | 4.68814706 | 2.68593253  |
| CRISPLD2    | 1.603957727 | 4.30505215 | 2.684018464 |

|             |             |            |             |
|-------------|-------------|------------|-------------|
| ZNF146      | 4.239659565 | 11.3773877 | 2.683561617 |
| BAGE2       | 0.1         | 0.26830771 | 2.683077128 |
| TMEM133     | 0.623360002 | 1.67191484 | 2.682101571 |
| HERC1       | 0.637744392 | 1.70993624 | 2.681225055 |
| NCSTN       | 7.28879399  | 19.5130135 | 2.677125118 |
| DKK1        | 14.26000502 | 38.1572023 | 2.675819697 |
| CPQ         | 4.152869225 | 11.1116238 | 2.675649826 |
| FUBP1       | 1.766577388 | 4.7176855  | 2.670522975 |
| PHEX        | 0.222474687 | 0.59390112 | 2.669522241 |
| CADM1       | 7.771219113 | 20.7095671 | 2.664905834 |
| RAPSN       | 0.562347325 | 1.49837384 | 2.664498913 |
| LOC653513   | 0.197291282 | 0.52503991 | 2.661242321 |
| GBA         | 8.39676553  | 22.3201584 | 2.658185269 |
| EMC6        | 17.35509427 | 46.1297513 | 2.657994859 |
| HOXA10      | 0.643105595 | 1.7092993  | 2.657882802 |
| ATP10D      | 0.220492654 | 0.58590822 | 2.65726867  |
| SENP8       | 0.21662494  | 0.57553665 | 2.656834659 |
| ERLIN2      | 2.82003904  | 7.48294589 | 2.653490176 |
| MANEA       | 0.233321494 | 0.61890678 | 2.652592222 |
| FILIP1L     | 1.752846219 | 4.64599504 | 2.650543438 |
| TNS1        | 0.917764216 | 2.43255934 | 2.650527547 |
| UBE3D       | 1.62672474  | 4.31116465 | 2.650211524 |
| SPRY2       | 3.261032568 | 8.64047697 | 2.649613824 |
| CHML        | 1.173824824 | 3.10991047 | 2.649382096 |
| ZFYVE28     | 0.30485831  | 0.80702775 | 2.647222413 |
| RGS3        | 2.34787892  | 6.20550457 | 2.643025804 |
| C14orf178   | 0.1         | 0.26422595 | 2.642259468 |
| C9orf135    | 0.358614527 | 0.94736391 | 2.641733224 |
| TSPAN13     | 34.18939218 | 90.2095337 | 2.638524054 |
| LOC10537919 | 0.242177424 | 0.63831753 | 2.635743308 |
| ARRDC2      | 0.412194178 | 1.0862002  | 2.635166274 |
| ATP2C2      | 0.182422095 | 0.48065638 | 2.634858344 |
| PARM1       | 0.313599626 | 0.82579137 | 2.633266447 |
| PPP1R3C     | 0.335949321 | 0.88340819 | 2.629587663 |
| KCTD9       | 1.579561767 | 4.15343721 | 2.629487052 |
| ZNF608      | 0.344607743 | 0.90558006 | 2.627857548 |
| CLEC18A     | 0.186255875 | 0.4893901  | 2.627514983 |
| XRCC4       | 1.798175111 | 4.72443423 | 2.627349358 |
| MYO5A       | 0.512180785 | 1.34530957 | 2.626630301 |
| CFHR1       | 0.334039168 | 0.87706603 | 2.625638276 |
| GNAT2       | 0.1         | 0.26251526 | 2.625152599 |
| GIN1        | 0.560957122 | 1.47236733 | 2.624741312 |
| SLC15A4     | 1.164351245 | 3.05403468 | 2.622949643 |
| DSG3        | 0.395291574 | 1.03648138 | 2.622067975 |
| PIK3CD      | 1.78126011  | 4.66810448 | 2.620675358 |
| SH3RF1      | 1.241551047 | 3.25348129 | 2.6204974   |

|             |             |            |             |
|-------------|-------------|------------|-------------|
| MAP1B       | 3.888669423 | 10.1857062 | 2.619329423 |
| YIPF5       | 3.141641622 | 8.22649721 | 2.618534574 |
| CSF1        | 3.727673439 | 9.75934818 | 2.618080243 |
| CCP110      | 0.273514782 | 0.71535032 | 2.615399102 |
| GMFG        | 0.192124067 | 0.50246571 | 2.615318941 |
| OGFR        | 16.90807411 | 44.2018601 | 2.614245702 |
| BBX         | 0.435635561 | 1.13814259 | 2.612602585 |
| AKR1C1      | 140.505675  | 366.832796 | 2.610804127 |
| TNFRSF1A    | 38.06405492 | 99.3746586 | 2.610721817 |
| TARSL2      | 1.321496101 | 3.44904712 | 2.609956338 |
| GPR153      | 0.826367076 | 2.1563022  | 2.609375738 |
| TES         | 22.53336935 | 58.7888753 | 2.608969584 |
| HCAR1       | 0.140785865 | 0.367274   | 2.608742039 |
| TMPPE       | 0.14586484  | 0.38051992 | 2.608715836 |
| RAB5A       | 3.633459245 | 9.47692812 | 2.608238453 |
| LOC10798484 | 0.1         | 0.26074237 | 2.607423661 |
| GXYLT1      | 1.478109125 | 3.85401787 | 2.607397387 |
| DCBLD1      | 13.61454882 | 35.4964766 | 2.607245901 |
| NOLC1       | 7.614114514 | 19.849795  | 2.606973528 |
| CCNE2       | 0.339564986 | 0.8849471  | 2.606120001 |
| PIK3R1      | 0.326674784 | 0.8512486  | 2.605798316 |
| CCDC153     | 0.397305388 | 1.03517106 | 2.605479547 |
| SPA17       | 4.132977872 | 10.765377  | 2.604750701 |
| ZNFX1       | 2.916814272 | 7.58430064 | 2.60020006  |
| ZNF845      | 0.237352399 | 0.61697162 | 2.599390707 |
| BLVRB       | 72.29922421 | 187.740423 | 2.596714209 |
| EOMES       | 0.1         | 0.25942481 | 2.594248057 |
| TAX1BP1     | 12.65944037 | 32.8389366 | 2.59402751  |
| HCN4        | 1.091111194 | 2.83004052 | 2.593723293 |
| P2RY1       | 0.153988226 | 0.39875638 | 2.589525098 |
| ZNF468      | 0.779903988 | 2.01833225 | 2.587924004 |
| CEP19       | 0.513554225 | 1.32856223 | 2.586995027 |
| MBL2        | 0.130054337 | 0.33633902 | 2.586142314 |
| STPG1       | 0.803275244 | 2.07631582 | 2.584812407 |
| RP2         | 0.924042687 | 2.38463112 | 2.580650395 |
| CD47        | 0.327122186 | 0.84417762 | 2.580618673 |
| BTN2A1      | 2.748668133 | 7.092747   | 2.580430469 |
| LOC10798399 | 0.64378544  | 1.66114467 | 2.580276851 |
| GPX8        | 0.853262601 | 2.20051402 | 2.57894114  |
| KIDINS220   | 0.743304075 | 1.91596728 | 2.577635918 |
| LYG2        | 0.129832806 | 0.33459697 | 2.577137297 |
| SNX6        | 2.485026295 | 6.40339707 | 2.576792481 |
| RASEF       | 0.480499899 | 1.23736558 | 2.575163036 |
| ISCA1       | 13.15683965 | 33.8222084 | 2.570693971 |
| PVRIG       | 0.559342448 | 1.43783054 | 2.570572897 |
| ATP2C1      | 4.960649993 | 12.7352912 | 2.567262598 |

|           |             |            |             |
|-----------|-------------|------------|-------------|
| HEATR5B   | 0.536111728 | 1.37455119 | 2.563926723 |
| MEX3D     | 5.85145097  | 14.9898192 | 2.56172687  |
| ADGRG6    | 6.806767077 | 17.4362062 | 2.561598774 |
| MAP2      | 0.858721463 | 2.19928063 | 2.561110591 |
| LMO7      | 4.891121622 | 12.5203592 | 2.559813513 |
| BBS1      | 3.270598754 | 8.36368396 | 2.557233273 |
| RASA4     | 0.164976554 | 0.42171412 | 2.556206372 |
| ZNF720    | 0.428279165 | 1.09435436 | 2.555236053 |
| NINJ2     | 6.951101443 | 17.7525307 | 2.553916214 |
| ZNF664    | 3.006318309 | 7.66909185 | 2.5509913   |
| CPT1A     | 0.724086627 | 1.84696015 | 2.550744736 |
| NODAL     | 0.129103433 | 0.32886137 | 2.547270573 |
| CDC42BPA  | 1.459089915 | 3.71648019 | 2.547122116 |
| CARD6     | 1.305504359 | 3.32115677 | 2.543964517 |
| PCDHB8    | 0.323938621 | 0.82396322 | 2.543578216 |
| LNPEP     | 0.24939762  | 0.63400987 | 2.54216489  |
| DCAF6     | 6.813824743 | 17.3172539 | 2.541488017 |
| ULBP3     | 0.756530486 | 1.92215583 | 2.540751318 |
| CCDC103   | 0.911718243 | 2.3163641  | 2.54065784  |
| SDCBP     | 10.73578733 | 27.2744985 | 2.540521499 |
| LDLR      | 8.014308678 | 20.3395682 | 2.537906767 |
| ANKDD1B   | 0.377505936 | 0.95797086 | 2.537631239 |
| GCLC      | 5.083518215 | 12.8986841 | 2.537353762 |
| IGF2R     | 4.824848187 | 12.2394594 | 2.536755347 |
| DNAJC2    | 12.10698976 | 30.6989636 | 2.53563968  |
| HIST1H2AD | 1.885581183 | 4.78043948 | 2.535260495 |
| LEPR      | 0.442859405 | 1.12267831 | 2.535067094 |
| ANK3      | 0.192156339 | 0.48712182 | 2.535028653 |
| KLHL20    | 0.28839336  | 0.73099796 | 2.534725355 |
| ISM1      | 0.217109877 | 0.55022746 | 2.534327172 |
| TTC26     | 0.505272098 | 1.28035115 | 2.533983489 |
| TVP23B    | 2.842910854 | 7.20106838 | 2.532991273 |
| DHFRL1    | 0.366206013 | 0.92701066 | 2.531391156 |
| RIBC1     | 0.31430576  | 0.79549647 | 2.530963706 |
| ZW10      | 1.994605815 | 5.04822582 | 2.530939089 |
| NEDD4     | 1.06431249  | 2.6936358  | 2.530869296 |
| KIAA0556  | 1.354223618 | 3.42648378 | 2.530220071 |
| HIC1      | 0.119230206 | 0.30162806 | 2.529795639 |
| AASS      | 1.094077945 | 2.76775927 | 2.529764247 |
| HMMR      | 1.394986926 | 3.52824932 | 2.529234684 |
| TIGD6     | 0.46416752  | 1.17389239 | 2.529027429 |
| CD46      | 3.720708223 | 9.40915519 | 2.528861343 |
| ASAP2     | 1.629159607 | 4.11757507 | 2.527422762 |
| ARFIP1    | 0.714807088 | 1.80535222 | 2.525649578 |
| U2AF1L5   | 1.664087334 | 4.19985062 | 2.523816226 |
| SLC22A1   | 0.256267079 | 0.64615167 | 2.521399436 |

|             |             |            |             |
|-------------|-------------|------------|-------------|
| C20orf194   | 1.005066624 | 2.5338195  | 2.521046306 |
| NID2        | 0.68067114  | 1.71526781 | 2.519965534 |
| NEIL3       | 0.706592109 | 1.77835909 | 2.516811426 |
| CAP2        | 1.077068255 | 2.71038439 | 2.516446263 |
| IL6R        | 0.452963722 | 1.13975212 | 2.516210592 |
| ETV3        | 0.52259954  | 1.3146222  | 2.515544124 |
| STON1       | 0.196997664 | 0.49550669 | 2.515292219 |
| CNTRL       | 0.617012152 | 1.55103689 | 2.513786625 |
| CDKN1B      | 2.482190354 | 6.23917336 | 2.513575703 |
| CD247       | 0.1         | 0.2511253  | 2.511253015 |
| LCTL        | 0.461114739 | 1.15792999 | 2.511153712 |
| ZNF165      | 0.457416587 | 1.14840795 | 2.510639055 |
| HARBI1      | 0.475330821 | 1.19314747 | 2.510141179 |
| ZNF827      | 0.501908293 | 1.25922616 | 2.508876977 |
| TDG         | 4.741190055 | 11.8895904 | 2.507722794 |
| LOC10537894 | 0.205582192 | 0.51513463 | 2.505735678 |
| KCNE3       | 0.121179055 | 0.30355653 | 2.505024728 |
| ZNF256      | 0.566998156 | 1.42012396 | 2.504635937 |
| MAP4K3      | 1.248600433 | 3.12285051 | 2.501080755 |
| ZNF43       | 0.283511011 | 0.70835727 | 2.498517656 |
| PIGN        | 0.641420894 | 1.60146708 | 2.496749163 |
| CTSO        | 0.720965839 | 1.80004371 | 2.496711508 |
| PPTC7       | 0.164791633 | 0.41136328 | 2.49626315  |
| PIGK        | 1.569842876 | 3.91841302 | 2.496054271 |
| GBP2        | 2.832159546 | 7.06913249 | 2.496021985 |
| IQGAP1      | 7.989742766 | 19.93485   | 2.495055292 |
| BEST3       | 0.655094054 | 1.63161639 | 2.490659738 |
| PBLD        | 0.308465411 | 0.76786889 | 2.489319273 |
| C1QTNF9B    | 0.540677167 | 1.34571902 | 2.488951085 |
| TUBB4A      | 0.123789091 | 0.30785651 | 2.486943764 |
| ZNF367      | 1.739032404 | 4.32469475 | 2.486839657 |
| TOR4A       | 5.754706102 | 14.309641  | 2.486598049 |
| PPM1J       | 0.277099651 | 0.68801321 | 2.482908963 |
| SLC6A13     | 0.357135791 | 0.88635084 | 2.481831451 |
| PITRM1      | 18.26448943 | 45.3293108 | 2.481827425 |
| CACNG4      | 1.710667108 | 4.24462241 | 2.48126733  |
| NOTCH3      | 0.498664018 | 1.23700678 | 2.480641734 |
| RASA4B      | 0.312542127 | 0.77530211 | 2.480632351 |
| C14orf28    | 0.496932362 | 1.23172361 | 2.478654448 |
| C2CD3       | 0.907072145 | 2.24817808 | 2.478499741 |
| RAB22A      | 1.72809668  | 4.27565969 | 2.474201667 |
| LOC10537675 | 0.1         | 0.24734717 | 2.473471689 |
| ZNF34       | 0.545712525 | 1.34945351 | 2.472828544 |
| NPFFR2      | 0.395280935 | 0.97720299 | 2.472173342 |
| TMEFF1      | 0.368627258 | 0.91082432 | 2.470854517 |
| HCFC2       | 0.327803978 | 0.80992032 | 2.470745848 |

|             |             |            |             |
|-------------|-------------|------------|-------------|
| CD164       | 28.58208546 | 70.6164157 | 2.470653018 |
| TESMIN      | 0.20048512  | 0.49509365 | 2.46947828  |
| DCDC5       | 0.112756831 | 0.27833992 | 2.468497205 |
| ECT2        | 5.294213247 | 13.0685333 | 2.468456151 |
| INVS        | 1.749263762 | 4.31793324 | 2.468428907 |
| FBXO34      | 1.432557681 | 3.53588105 | 2.468229443 |
| FANCF       | 1.054036728 | 2.60076066 | 2.467428873 |
| MYLK2       | 0.186945593 | 0.46085021 | 2.465156854 |
| ADSS        | 5.006727435 | 12.3316931 | 2.463024661 |
| IFT52       | 4.041481278 | 9.95326064 | 2.462775392 |
| SGMS1       | 1.814690803 | 4.46741249 | 2.461803675 |
| GFM2        | 3.652070914 | 8.98546753 | 2.460375974 |
| EXOC1       | 2.07012857  | 5.09059678 | 2.45907276  |
| GPAT3       | 0.434418171 | 1.06649753 | 2.455002124 |
| DENR        | 10.80561532 | 26.5250529 | 2.454747102 |
| GALK2       | 0.714720132 | 1.75429871 | 2.454525394 |
| OTUD3       | 0.701170569 | 1.72020234 | 2.453329361 |
| SRGAP1      | 0.496011482 | 1.21668125 | 2.452929613 |
| RSRP1       | 2.137746801 | 5.24359585 | 2.452861046 |
| ME1         | 11.19303093 | 27.4440168 | 2.451884302 |
| ZNF227      | 1.528683233 | 3.74765302 | 2.451556307 |
| TBCK        | 0.549618665 | 1.34730838 | 2.451351212 |
| HSPA13      | 1.257246496 | 3.08020459 | 2.449960769 |
| HCLS1       | 0.338311129 | 0.82878286 | 2.449765275 |
| NAAA        | 4.991418616 | 12.2263198 | 2.44946793  |
| SLC35B3     | 4.528118032 | 11.0890336 | 2.448927677 |
| AGO4        | 0.590080206 | 1.44471768 | 2.448341208 |
| YEATS4      | 2.219754198 | 5.43413215 | 2.448078329 |
| TGFBR2      | 8.536817613 | 20.8985711 | 2.448051729 |
| LOC10050554 | 0.314413886 | 0.76908402 | 2.446087947 |
| C1orf228    | 0.786761994 | 1.92417129 | 2.445684084 |
| GPATCH11    | 0.830506588 | 2.02841456 | 2.442382266 |
| STX2        | 2.594921654 | 6.337024   | 2.442086832 |
| ZNF678      | 0.213185291 | 0.52030514 | 2.440624007 |
| NDUFS2      | 17.40806856 | 42.4808252 | 2.440295147 |
| ZNF33B      | 0.439793434 | 1.07315108 | 2.440125284 |
| VPS37A      | 1.313689501 | 3.20404823 | 2.438969201 |
| SEMA3A      | 0.570746338 | 1.39166801 | 2.438330165 |
| MORF4L2     | 26.57470862 | 64.7502003 | 2.436534724 |
| SLC2A1      | 4.847602503 | 11.8074753 | 2.435735051 |
| DAB2        | 7.568316517 | 18.4311279 | 2.435300884 |
| PPARG       | 7.981559281 | 19.4289594 | 2.434231044 |
| ENPEP       | 0.355236229 | 0.86461234 | 2.433908101 |
| MGLL        | 8.563185997 | 20.8360667 | 2.433214307 |
| KRCC1       | 2.584359897 | 6.28774941 | 2.433000689 |
| ENOX2       | 0.807519762 | 1.96455102 | 2.432820978 |

|          |             |            |             |
|----------|-------------|------------|-------------|
| AGTPBP1  | 1.496528473 | 3.63724607 | 2.430455643 |
| WNK1     | 1.735771189 | 4.21624126 | 2.429030557 |
| AKR1C3   | 1.290387456 | 3.13361818 | 2.428431996 |
| JMJD1C   | 0.556048734 | 1.34975086 | 2.427396692 |
| MAP4K5   | 1.053872526 | 2.55813057 | 2.42736243  |
| KMT2E    | 0.63856133  | 1.54964821 | 2.426780541 |
| CEP128   | 0.142435831 | 0.34564299 | 2.42665757  |
| PSMD10   | 6.001266402 | 14.5576218 | 2.425758309 |
| STAM2    | 0.781533881 | 1.89576939 | 2.425703398 |
| COL28A1  | 0.401362446 | 0.97255224 | 2.42312716  |
| JUN      | 12.35887725 | 29.9188457 | 2.420838484 |
| S100A11  | 495.0787354 | 1197.71993 | 2.41925141  |
| CENPQ    | 0.948375632 | 2.29414678 | 2.419027543 |
| F2RL1    | 3.616659715 | 8.74763822 | 2.41870646  |
| PLAC8    | 3.678591969 | 8.89178253 | 2.417170104 |
| NIPBL    | 0.527424726 | 1.27437781 | 2.416226895 |
| CXCL8    | 18.50876601 | 44.7137845 | 2.415816616 |
| ATXN7L3B | 3.727416418 | 9.00325859 | 2.415415286 |
| FAM220A  | 2.814664076 | 6.7845301  | 2.410422672 |
| TRNP1    | 30.89218341 | 74.4631077 | 2.410419061 |
| SP110    | 0.928436285 | 2.23746832 | 2.40993201  |
| ATL1     | 0.143117727 | 0.34488095 | 2.409770994 |
| ANKRD1   | 45.98599912 | 110.785044 | 2.409103764 |
| PP2D1    | 0.527533523 | 1.2704761  | 2.408332452 |
| INTU     | 0.469109718 | 1.12895591 | 2.406592462 |
| SBF2     | 0.306238569 | 0.73670796 | 2.405666791 |
| CDK8     | 1.378100215 | 3.31484732 | 2.405374649 |
| ZFAND4   | 0.288500601 | 0.69292672 | 2.401820701 |
| IVNS1ABP | 1.66543517  | 3.9998049  | 2.401657518 |
| RPS6KC1  | 1.265691711 | 3.03848823 | 2.400654289 |
| LDHB     | 1.047356467 | 2.51427091 | 2.400587564 |
| AP3S1    | 3.38108394  | 8.11527133 | 2.400198123 |
| CCDC74B  | 0.600080397 | 1.43996108 | 2.399613588 |
| ITGA6    | 4.069044739 | 9.7593975  | 2.398449298 |
| MAT2A    | 5.714542031 | 13.7053494 | 2.398328562 |
| SVEP1    | 0.129508957 | 0.31056417 | 2.39801303  |
| CCDC102B | 0.126595011 | 0.30332651 | 2.396038399 |
| RMDN2    | 0.186941146 | 0.44726665 | 2.39255327  |
| KCNAB3   | 0.148782451 | 0.35574117 | 2.391015652 |
| CEP97    | 0.41541439  | 0.99239453 | 2.388926708 |
| C6orf141 | 1.532623824 | 3.66017493 | 2.388175672 |
| ATP2A2   | 8.102152401 | 19.3467477 | 2.38785285  |
| KMT5A    | 3.184886521 | 7.60486942 | 2.387799179 |
| HEATR4   | 0.130106501 | 0.31044376 | 2.386074168 |
| GATA2    | 5.742950376 | 13.7008857 | 2.38568764  |
| S100A14  | 0.1         | 0.23849864 | 2.384986444 |

|           |             |            |             |
|-----------|-------------|------------|-------------|
| PCDH9     | 0.228528114 | 0.54488503 | 2.38432383  |
| IL9       | 0.305447581 | 0.72828234 | 2.384312038 |
| MLYCD     | 2.810504102 | 6.69739397 | 2.382986727 |
| SNAI1     | 1.982748562 | 4.72475257 | 2.382930776 |
| ZNHIT6    | 1.87777707  | 4.47404708 | 2.38262952  |
| DR1       | 2.597254083 | 6.18306418 | 2.380615827 |
| PLPPR2    | 3.217289218 | 7.65301803 | 2.378716213 |
| PCDHB2    | 1.456887215 | 3.46550707 | 2.37870649  |
| SOX6      | 0.78965314  | 1.87820907 | 2.378524156 |
| HAVCR1    | 1.655374023 | 3.93589737 | 2.377648386 |
| E2F5      | 0.660182332 | 1.56837317 | 2.375666684 |
| SERINC1   | 12.21540812 | 29.0080236 | 2.37470769  |
| ZC3H8     | 2.072010773 | 4.92040622 | 2.374701081 |
| BAZ2B     | 0.651906911 | 1.5466813  | 2.372549314 |
| PTPRF     | 16.8832709  | 40.0403913 | 2.371601542 |
| FYCO1     | 1.592811544 | 3.77736152 | 2.371505613 |
| NIPAL2    | 0.524247102 | 1.2429445  | 2.370913436 |
| CCZ1B     | 5.82047305  | 13.7946192 | 2.370016854 |
| NAA20     | 28.51403101 | 67.5254616 | 2.368148563 |
| ADHFE1    | 0.196110438 | 0.46389697 | 2.365488395 |
| C14orf142 | 2.216581777 | 5.24211549 | 2.364954698 |
| GAS8      | 6.283548313 | 14.8539578 | 2.36394424  |
| BROX      | 2.872327948 | 6.78902864 | 2.363598017 |
| CRIP2     | 11.38559271 | 26.8763581 | 2.360558538 |
| P4HA3     | 0.179221088 | 0.42302294 | 2.360341308 |
| USP16     | 3.541905049 | 8.3574826  | 2.359600973 |
| CTTNBP2   | 0.27605537  | 0.65121657 | 2.359007075 |
| EEPDI     | 4.672337393 | 11.0213583 | 2.358853268 |
| IFNAR2    | 3.948089995 | 9.31044003 | 2.358213729 |
| ZMYM6     | 0.925983132 | 2.18262121 | 2.357085279 |
| CRIM1     | 2.786729815 | 6.56471596 | 2.355705934 |
| ZNF354A   | 0.607606691 | 1.43055972 | 2.354417324 |
| ZNF134    | 1.009417461 | 2.37642428 | 2.35425319  |
| RGS19     | 2.770988459 | 6.52225041 | 2.353763108 |
| SBK2      | 0.1         | 0.23531883 | 2.353188286 |
| DOCK7     | 4.241991439 | 9.97484536 | 2.351453439 |
| TCF3      | 7.747666521 | 18.2116095 | 2.350592841 |
| ANKRD37   | 0.21799759  | 0.51240024 | 2.350485796 |
| RNF144A   | 0.168753975 | 0.39661336 | 2.350245999 |
| PIIP5K1   | 0.159511038 | 0.37484446 | 2.349959383 |
| EPC2      | 0.596369109 | 1.4011033  | 2.349389468 |
| PIK3C2G   | 0.190154084 | 0.44659625 | 2.348601942 |
| FHL3      | 12.99670223 | 30.5120288 | 2.347674686 |
| SCPEP1    | 3.311608477 | 7.77160772 | 2.346777337 |
| CTNNA1    | 37.75343797 | 88.5456307 | 2.345366024 |
| LRP2BP    | 0.195290787 | 0.45801823 | 2.345314096 |



|           |             |            |             |
|-----------|-------------|------------|-------------|
| GAB2      | 0.987858047 | 2.31523563 | 2.343692636 |
| MTRF1     | 0.686810718 | 1.60887407 | 2.342529075 |
| ARHGEF35  | 0.811634215 | 1.90104219 | 2.342240088 |
| CRISP3    | 0.15442381  | 0.36153957 | 2.341216509 |
| TBC1D10B  | 12.15701747 | 28.4455083 | 2.339842677 |
| FAM129B   | 20.27096549 | 47.4289839 | 2.339749624 |
| ZSWIM6    | 0.88328057  | 2.06641397 | 2.339476314 |
| KPNA7     | 0.64570571  | 1.51055942 | 2.339392995 |
| FAM3C     | 6.484435682 | 15.1636468 | 2.338468224 |
| GCSAM     | 0.373830174 | 0.87407109 | 2.338150191 |
| TRAF3     | 1.703559494 | 3.98040563 | 2.33652282  |
| TNFRSF21  | 20.7866591  | 48.5570706 | 2.335972817 |
| SLCO1A2   | 0.495142933 | 1.15648035 | 2.335649516 |
| PIBF1     | 0.795652254 | 1.85776183 | 2.334891681 |
| FAM162B   | 0.920402165 | 2.14806876 | 2.33383714  |
| NFATC1    | 0.196537086 | 0.45848327 | 2.332807927 |
| PRAME     | 1.662698342 | 3.87823911 | 2.332497132 |
| IRS1      | 1.927686234 | 4.49612707 | 2.332395695 |
| ZNF436    | 0.356729456 | 0.83198059 | 2.332245294 |
| COG6      | 0.700515034 | 1.63373351 | 2.332189083 |
| GABRG1    | 0.153812758 | 0.3586031  | 2.331426218 |
| SLC35G2   | 0.950397876 | 2.21575422 | 2.331396436 |
| ADGRE5    | 14.09523396 | 32.8505666 | 2.330615208 |
| NIPAL3    | 1.068206832 | 2.4891623  | 2.330225031 |
| GRIPAP1   | 12.21679607 | 28.4663652 | 2.330100711 |
| CFAP36    | 7.281141716 | 16.9563654 | 2.328805845 |
| CDK14     | 0.606013887 | 1.41078007 | 2.327966572 |
| CCNDBP1   | 2.927577874 | 6.81418661 | 2.327585091 |
| SMNDC1    | 4.736609647 | 11.0217223 | 2.326922227 |
| GLDN      | 0.108759163 | 0.25306588 | 2.326846519 |
| STK10     | 3.751259878 | 8.72785117 | 2.326645303 |
| SVBP      | 15.78903916 | 36.721566  | 2.325763186 |
| SPAG9     | 2.254641394 | 5.24367836 | 2.325726111 |
| EPHA5     | 0.164830071 | 0.38322546 | 2.324972937 |
| CELSR1    | 0.906915316 | 2.10843623 | 2.324843554 |
| RPE       | 1.327067382 | 3.08519262 | 2.32481987  |
| FOXJ3     | 1.880910381 | 4.3717464  | 2.324271504 |
| DNM1      | 2.222718889 | 5.16530321 | 2.323867059 |
| SUN3      | 4.134133905 | 9.60317246 | 2.322898261 |
| HIST1H2AE | 4.620939592 | 10.7278064 | 2.321563878 |
| ADPRM     | 1.699730177 | 3.94383919 | 2.320273678 |
| GALNT5    | 2.137278901 | 4.95747004 | 2.319524158 |
| LSMEM1    | 0.971575766 | 2.2533111  | 2.31923354  |
| UGT2B7    | 0.259594533 | 0.60200297 | 2.319012526 |
| SCTR      | 0.153044788 | 0.35491253 | 2.319010907 |
| CYR61     | 54.46102714 | 126.229177 | 2.317789128 |

|             |             |            |             |
|-------------|-------------|------------|-------------|
| SLC31A2     | 0.728765841 | 1.68898285 | 2.317593334 |
| ALKBH8      | 0.488112556 | 1.13037951 | 2.315817325 |
| ZCCHC3      | 8.043538762 | 18.614794  | 2.314254274 |
| ATAD2B      | 0.337727891 | 0.78156179 | 2.314176042 |
| COL4A3BP    | 1.450911513 | 3.3570701  | 2.313766254 |
| LOXL2       | 2.968177649 | 6.86636763 | 2.31332772  |
| ARHGAP42    | 0.426993034 | 0.98773941 | 2.313244791 |
| PPP1R18     | 1.112049348 | 2.57212602 | 2.312960322 |
| KLHDC8B     | 3.618351413 | 8.36840229 | 2.312766598 |
| STXBP5      | 0.936414607 | 2.16510571 | 2.312122961 |
| ATF7IP      | 0.975590127 | 2.25240101 | 2.308757485 |
| FAM122B     | 1.329389911 | 3.0690706  | 2.308630878 |
| PLIN3       | 34.86541825 | 80.4835479 | 2.308406205 |
| KCNAB2      | 1.046477331 | 2.41554927 | 2.308267176 |
| FGF22       | 0.785432777 | 1.81112841 | 2.305898693 |
| AFAP1       | 0.53463904  | 1.23251237 | 2.305316825 |
| HTATIP2     | 48.65342199 | 112.097815 | 2.304006797 |
| EFEMP1      | 4.338302589 | 9.99235744 | 2.303287343 |
| RAD50       | 1.820892097 | 4.19275356 | 2.302582106 |
| DNM1L       | 8.370302533 | 19.2709621 | 2.302301745 |
| BHLHA15     | 0.271982324 | 0.62594174 | 2.301405944 |
| TANC1       | 0.791280165 | 1.81805606 | 2.297613589 |
| AGAP5       | 0.500394132 | 1.14952971 | 2.297248585 |
| TPM4        | 23.7784283  | 54.6210767 | 2.29708524  |
| DYX1C1      | 0.49599944  | 1.13801016 | 2.294377918 |
| UHRF2       | 0.700833593 | 1.60791165 | 2.294284498 |
| CLIP4       | 0.466826346 | 1.07044359 | 2.29302309  |
| TCTN2       | 1.6010655   | 3.67033525 | 2.292432912 |
| PAPSS2      | 3.45178303  | 7.90962911 | 2.291461845 |
| ANKRD52     | 13.53105255 | 31.0040941 | 2.291329071 |
| PLSCR1      | 1.542925639 | 3.53204761 | 2.28918849  |
| MXD1        | 1.937397052 | 4.43463525 | 2.288965623 |
| TNFAIP8     | 2.205960582 | 5.04917285 | 2.288877187 |
| IL17RD      | 0.255926799 | 0.58572735 | 2.288651884 |
| MOSPD2      | 1.82159183  | 4.16639616 | 2.287228178 |
| EYA4        | 0.609253106 | 1.39334591 | 2.286973839 |
| LOC10272442 | 1.789226044 | 4.09179135 | 2.286905761 |
| PPM1N       | 0.549701928 | 1.25694814 | 2.286599479 |
| ESYT2       | 4.788012373 | 10.9458598 | 2.286096801 |
| MAP3K2      | 0.686432827 | 1.56886285 | 2.285530053 |
| TFRC        | 16.6022702  | 37.9341498 | 2.284877269 |
| TSGA10      | 0.323384299 | 0.73877548 | 2.284512531 |
| YWHAG       | 12.78634701 | 29.2060797 | 2.284161352 |
| WDR1        | 101.2101402 | 230.995134 | 2.282331921 |
| ANKIB1      | 1.55782129  | 3.55401908 | 2.281403588 |
| EID3        | 0.264748332 | 0.60381936 | 2.280729599 |

|             |             |            |             |
|-------------|-------------|------------|-------------|
| KDM3A       | 1.299602107 | 2.96349968 | 2.280313076 |
| LATS1       | 0.826000322 | 1.88320225 | 2.279904986 |
| POP1        | 2.569332713 | 5.85725292 | 2.279678647 |
| SVIL        | 0.609498805 | 1.38926765 | 2.27936075  |
| FAM13A      | 0.92201989  | 2.10130268 | 2.279020988 |
| C7orf25     | 1.789641568 | 4.07786095 | 2.278590877 |
| PTGER4      | 0.970836725 | 2.21186106 | 2.278303866 |
| MKRN3       | 0.301321976 | 0.68634835 | 2.277790557 |
| CCDC88A     | 0.910453336 | 2.0730376  | 2.276928998 |
| UBE2A       | 15.68152526 | 35.6892843 | 2.275880928 |
| SNAPC1      | 1.448597837 | 3.29548077 | 2.274945253 |
| CCDC17      | 0.370164222 | 0.84188784 | 2.274363088 |
| TMEM243     | 5.763340012 | 13.0961562 | 2.272320602 |
| POLK        | 0.342612603 | 0.77834263 | 2.271786353 |
| GOLGA6L9    | 0.268746394 | 0.61037506 | 2.271193476 |
| TMEM2       | 15.86610974 | 36.0271386 | 2.270697683 |
| RIT1        | 2.392265127 | 5.43068933 | 2.270103455 |
| LOC10192724 | 0.354637233 | 0.80454711 | 2.268648162 |
| TCEANC      | 0.321703324 | 0.72956611 | 2.267822742 |
| CTNNB1      | 24.47502569 | 55.4908457 | 2.267243614 |
| MAP10       | 0.155645976 | 0.35282667 | 2.2668538   |
| MTURN       | 0.841381661 | 1.90648541 | 2.265898466 |
| SNX25       | 0.644691517 | 1.45977905 | 2.264306282 |
| LRRC37B     | 0.68429139  | 1.54922642 | 2.263986434 |
| LGALS3      | 23.31620688 | 52.7381942 | 2.261868512 |
| FPGT        | 0.575701213 | 1.30199342 | 2.261578392 |
| ZNF823      | 0.957024467 | 2.16432203 | 2.261511701 |
| MCIDAS      | 0.1         | 0.22605746 | 2.260574639 |
| EML6        | 0.283824552 | 0.64133602 | 2.259621349 |
| MED11       | 8.611883909 | 19.4586837 | 2.259515331 |
| PLEKHA7     | 0.620438535 | 1.40074415 | 2.257667873 |
| CGA         | 0.1         | 0.22569901 | 2.256990067 |
| GLRB        | 0.771111295 | 1.73886137 | 2.255007001 |
| COMMD10     | 0.646372231 | 1.45715495 | 2.25435883  |
| SKIL        | 2.591725231 | 5.83774123 | 2.252453757 |
| DEPDC7      | 0.800263032 | 1.80254703 | 2.252443204 |
| MAK16       | 2.410164351 | 5.42824514 | 2.252230281 |
| RBMS2       | 2.925872648 | 6.58216417 | 2.249641374 |
| FAM72B      | 0.230934062 | 0.51947864 | 2.249467382 |
| FAM127B     | 25.10663934 | 56.4708169 | 2.249238385 |
| ZNF251      | 1.715158237 | 3.85742631 | 2.24902066  |
| HTATSF1     | 7.81041214  | 17.5378144 | 2.24544033  |
| HIBADH      | 7.793495257 | 17.4939409 | 2.244684878 |
| PLAGL1      | 1.994170203 | 4.47600053 | 2.244542881 |
| STK36       | 1.711545814 | 3.84055792 | 2.243911841 |
| ZNF184      | 0.387809234 | 0.87013454 | 2.243717943 |

|           |             |            |             |
|-----------|-------------|------------|-------------|
| WDR41     | 2.142931614 | 4.80388296 | 2.241734138 |
| CTBS      | 0.922254089 | 2.06716311 | 2.241424713 |
| MAGI3     | 0.722334057 | 1.61878524 | 2.241047927 |
| GSG2      | 0.924801891 | 2.07235538 | 2.240864128 |
| KLF10     | 2.262214365 | 5.06736848 | 2.240003671 |
| EFL1      | 3.609324057 | 8.08308726 | 2.239501671 |
| E2F3      | 0.716450647 | 1.60442698 | 2.239410327 |
| PLA2R1    | 0.131949142 | 0.29540831 | 2.238804301 |
| FAM229B   | 2.963882362 | 6.63380707 | 2.238215375 |
| TEX9      | 0.291755402 | 0.65290094 | 2.23783667  |
| INIP      | 1.693432027 | 3.78948029 | 2.237751638 |
| CLIP3     | 0.66212741  | 1.48137971 | 2.237303104 |
| HIST1H4E  | 0.422067694 | 0.9442172  | 2.23712266  |
| DST       | 1.961401579 | 4.38757135 | 2.236957182 |
| TTC14     | 1.342857009 | 3.0032348  | 2.236451667 |
| CDRT15    | 0.421215663 | 0.94198382 | 2.236345668 |
| GSK3B     | 3.203944878 | 7.1587942  | 2.234368714 |
| STXBP6    | 2.165448684 | 4.83629973 | 2.233393829 |
| ITPRIPL2  | 0.754488908 | 1.68466627 | 2.232857567 |
| FNBP1L    | 2.070058875 | 4.62198924 | 2.232781541 |
| SEC16B    | 0.688389823 | 1.5368546  | 2.232535327 |
| TOB1      | 2.053129016 | 4.57966996 | 2.230580702 |
| ADAM10    | 5.828473602 | 12.9977069 | 2.230036161 |
| HIST1H3H  | 2.410308    | 5.37085433 | 2.228285485 |
| ZFAND5    | 13.07376267 | 29.1174486 | 2.227166681 |
| MRFAP1    | 143.2015777 | 318.904221 | 2.226960247 |
| RNF146    | 1.283732713 | 2.85567735 | 2.224510853 |
| WDFY3     | 0.557866907 | 1.2409116  | 2.224386468 |
| PKD2      | 0.566170634 | 1.25928192 | 2.224209178 |
| VMP1      | 13.82665535 | 30.7422522 | 2.223404827 |
| OSBPL3    | 3.638868884 | 8.08478982 | 2.221786517 |
| ZNF443    | 0.186011467 | 0.41313448 | 2.221016192 |
| MKNK2     | 17.51896952 | 38.8922079 | 2.220005456 |
| ARL6IP1   | 30.11466353 | 66.8411112 | 2.219553645 |
| HIST1H2BE | 0.1         | 0.22194248 | 2.219424846 |
| TOP1      | 5.010109157 | 11.1096037 | 2.217437451 |
| HAUS3     | 3.665295981 | 8.11665419 | 2.214460777 |
| TMEM44    | 1.434979021 | 3.17716433 | 2.214084168 |
| RFX2      | 1.251595646 | 2.7703091  | 2.213421811 |
| ITFG1     | 3.760441426 | 8.32197203 | 2.213030622 |
| PDGFRA    | 0.645484663 | 1.4282732  | 2.212714384 |
| VCL       | 6.712829986 | 14.844379  | 2.211344401 |
| SLC35E2   | 0.620865436 | 1.37260758 | 2.21079722  |
| ANKS1B    | 0.88590658  | 1.95777203 | 2.209907993 |
| BPTF      | 0.832250569 | 1.8391797  | 2.209886982 |
| SMURF1    | 4.376967318 | 9.67258026 | 2.209881765 |

|             |             |            |             |
|-------------|-------------|------------|-------------|
| BMPER       | 0.112067136 | 0.24761076 | 2.209485928 |
| PITX1       | 11.23309493 | 24.8083209 | 2.208502737 |
| PLS1        | 1.404339561 | 3.10111255 | 2.208235552 |
| TMEM116     | 2.362960214 | 5.2135907  | 2.206381074 |
| ZNF396      | 0.193519528 | 0.42684969 | 2.205718946 |
| FGD6        | 0.485645548 | 1.0708922  | 2.205090115 |
| VEZT        | 3.573263994 | 7.87655857 | 2.204303567 |
| SYBU        | 0.536760865 | 1.18297161 | 2.203908083 |
| HMX3        | 0.269580336 | 0.59390112 | 2.203058035 |
| ZNF84       | 0.98571972  | 2.17109068 | 2.202543618 |
| ZNF559-ZNF1 | 0.164084898 | 0.36130532 | 2.201941362 |
| MADCAM1     | 0.139498868 | 0.30707214 | 2.201251866 |
| ZNF528      | 0.61673824  | 1.3568744  | 2.200081516 |
| PKM         | 659.0258957 | 1449.24887 | 2.199077271 |
| IRAK2       | 1.395048215 | 3.06648206 | 2.198119055 |
| ZNF595      | 1.270474538 | 2.79210422 | 2.197686086 |
| ZBTB3       | 0.508270076 | 1.11666574 | 2.196992883 |
| CLCN3       | 1.73322978  | 3.80690012 | 2.196419752 |
| SBDS        | 15.79753925 | 34.6701246 | 2.194653485 |
| MRFAP1L1    | 21.68399767 | 47.580589  | 2.194272002 |
| LOC10798597 | 0.168715065 | 0.37017817 | 2.194102642 |
| DENND6A     | 0.658336238 | 1.44428318 | 2.193838197 |
| PEX6        | 4.872779893 | 10.6847332 | 2.192738724 |
| GLIPR1L1    | 0.180709599 | 0.39618309 | 2.192374348 |
| ZNF547      | 0.248382794 | 0.54451101 | 2.19222517  |
| PLCD3       | 8.675319261 | 19.0151459 | 2.191866993 |
| MEPE        | 0.265121741 | 0.58091551 | 2.191127395 |
| TEX2        | 0.886930594 | 1.94293548 | 2.190628548 |
| SLC25A12    | 0.16074013  | 0.3520897  | 2.190428134 |
| NR0B2       | 1.150837707 | 2.52062068 | 2.190248606 |
| SLC5A12     | 0.755511833 | 1.6546115  | 2.190053718 |
| ZNF177      | 0.17442962  | 0.38180823 | 2.188895638 |
| ZHX2        | 2.156727629 | 4.71950112 | 2.188269421 |
| CDKN2A      | 34.25070006 | 74.9222007 | 2.187464799 |
| TFPI2       | 0.373243602 | 0.81623747 | 2.186875977 |
| FAM127A     | 68.81329776 | 150.450967 | 2.186364721 |
| PRKD3       | 1.674831653 | 3.66041214 | 2.185540337 |
| TMF1        | 0.40564465  | 0.88590809 | 2.183951118 |
| DAPK1       | 2.280294767 | 4.97999906 | 2.183927765 |
| CCDC186     | 0.385892978 | 0.84264323 | 2.183618987 |
| CLDN2       | 0.754864165 | 1.64826721 | 2.18352822  |
| RABL2B      | 2.877287102 | 6.28036589 | 2.182738692 |
| ZNF407      | 0.400620344 | 0.87441234 | 2.182645866 |
| LRRFIP2     | 6.706866289 | 14.634453  | 2.182010554 |
| ZBTB5       | 2.924997967 | 6.38215193 | 2.181933799 |
| ZNF493      | 0.271531109 | 0.59244584 | 2.181870943 |

|          |             |            |             |
|----------|-------------|------------|-------------|
| CDS2     | 3.070662122 | 6.69900238 | 2.181614947 |
| CASC4    | 2.344692135 | 5.11330605 | 2.180800617 |
| CAMK2N1  | 9.938544725 | 21.6699709 | 2.180396781 |
| CTSC     | 11.07532976 | 24.1431485 | 2.179903355 |
| ZNF425   | 0.552495107 | 1.20373097 | 2.178717877 |
| LONRF3   | 0.616868886 | 1.34332885 | 2.177657012 |
| PIK3C2B  | 1.534533969 | 3.34160341 | 2.177601462 |
| SCRN3    | 1.346485105 | 2.93169334 | 2.177293558 |
| TM4SF1   | 121.4128249 | 264.330505 | 2.177121775 |
| MBIP     | 2.356990009 | 5.13012749 | 2.176558862 |
| MYEOV    | 0.173026977 | 0.37649749 | 2.175946784 |
| ELOVL1   | 67.5303979  | 146.903452 | 2.17536779  |
| SUCO     | 5.005217274 | 10.8865301 | 2.175036463 |
| IBTK     | 3.115758749 | 6.77371857 | 2.174018952 |
| PLPP2    | 0.275842897 | 0.59933726 | 2.172748555 |
| CFAP126  | 1.418091857 | 3.08081629 | 2.172508273 |
| PHF7     | 0.50968206  | 1.10675839 | 2.171468205 |
| TMX3     | 1.750486632 | 3.80029266 | 2.170992103 |
| KIF9     | 2.18937282  | 4.75229363 | 2.17061872  |
| BBS4     | 3.361178867 | 7.28966122 | 2.168781106 |
| RNF103   | 3.171056748 | 6.87653799 | 2.168531987 |
| FSD1L    | 0.455962457 | 0.98863196 | 2.168231064 |
| PPP1R11  | 5.31724502  | 11.5282606 | 2.168089029 |
| DSCR3    | 4.67517418  | 10.1346549 | 2.167759863 |
| SH3BP5   | 0.392401013 | 0.85048588 | 2.16738962  |
| JOSD2    | 16.44727278 | 35.6226148 | 2.165867574 |
| POU6F2   | 0.563659202 | 1.22054721 | 2.165399236 |
| DPCD     | 29.88501378 | 64.6967038 | 2.164854407 |
| LRP11    | 4.915837807 | 10.6415537 | 2.164748736 |
| KIAA0430 | 1.328277366 | 2.87529152 | 2.164677045 |
| C6orf62  | 15.66767249 | 33.9054917 | 2.164041388 |
| CAPN2    | 27.93110855 | 60.429541  | 2.163521038 |
| FAM46C   | 0.333499078 | 0.72133107 | 2.162917732 |
| FAM219A  | 6.782486589 | 14.6694677 | 2.162845078 |
| ARPP21   | 0.187003444 | 0.40407605 | 2.160794694 |
| PODN     | 4.462274734 | 9.6363456  | 2.159514188 |
| IFT81    | 0.809618852 | 1.74796772 | 2.159000765 |
| DNAJB4   | 0.943463551 | 2.03669881 | 2.158746687 |
| SMIM10   | 3.182917512 | 6.86876057 | 2.158007723 |
| HSPA4L   | 0.518584902 | 1.11883982 | 2.157486295 |
| NES      | 44.19595215 | 95.3290066 | 2.15696239  |
| 44258    | 1.567891101 | 3.37901227 | 2.155131993 |
| MTAP     | 2.381858115 | 5.13291468 | 2.155004383 |
| PRDM10   | 0.671244494 | 1.44631931 | 2.154683313 |
| SLC4A4   | 0.376204551 | 0.81020837 | 2.153637889 |
| P4HTM    | 1.934854777 | 4.16608482 | 2.153177008 |

|           |             |            |             |
|-----------|-------------|------------|-------------|
| NRP1      | 10.34219084 | 22.2652241 | 2.15285373  |
| SPEF1     | 0.559053007 | 1.20301472 | 2.151879532 |
| GNG12     | 3.636981454 | 7.82606878 | 2.151803325 |
| UBE2D1    | 4.124451149 | 8.87090267 | 2.150808034 |
| MAGEB2    | 9.691554129 | 20.8427709 | 2.150611829 |
| TTYH3     | 4.619868089 | 9.93455264 | 2.150397469 |
| TATDN3    | 1.3798148   | 2.96674676 | 2.150105043 |
| SYCP2L    | 0.487921791 | 1.04904758 | 2.150032239 |
| PTTG1IP   | 73.16224153 | 157.264057 | 2.149524857 |
| CADM4     | 23.17305685 | 49.8052922 | 2.149275883 |
| CENPF     | 2.776984377 | 5.96812676 | 2.149139481 |
| KIAA1841  | 3.043938699 | 6.54110155 | 2.148893983 |
| BRPF1     | 2.266437203 | 4.87015427 | 2.148815006 |
| RALB      | 9.784652228 | 21.023298  | 2.148599408 |
| TNFRSF10B | 7.115090253 | 15.2830723 | 2.147980099 |
| LIPA      | 4.230812495 | 9.0848176  | 2.147298565 |
| ERMN      | 0.195380613 | 0.4194644  | 2.146909037 |
| ERC1      | 1.141821158 | 2.45019884 | 2.145869184 |
| FRYL      | 0.454127437 | 0.97444173 | 2.145745121 |
| PLCG2     | 0.225505419 | 0.48381001 | 2.145447395 |
| TRIM36    | 0.565208891 | 1.21182854 | 2.144036579 |
| TAF1B     | 1.485112911 | 3.18268291 | 2.143057872 |
| RLF       | 0.618804724 | 1.32560013 | 2.14219458  |
| MESDC2    | 8.579732154 | 18.3742259 | 2.141585022 |
| PXMP2     | 24.14284131 | 51.7038424 | 2.141580674 |
| HOXC6     | 0.976464296 | 2.0911013  | 2.141503084 |
| FAM32A    | 33.555348   | 71.8323869 | 2.140713514 |
| POLR3G    | 1.86131296  | 3.98201637 | 2.139358858 |
| CSRNP2    | 3.482123249 | 7.44817344 | 2.138974673 |
| GPATCH8   | 1.047266334 | 2.23983305 | 2.138742528 |
| ZEB1      | 0.494528414 | 1.05688985 | 2.137167088 |
| KIF16B    | 0.657884242 | 1.40566904 | 2.136651022 |
| HECW1     | 0.437878535 | 0.93552947 | 2.136504515 |
| ADGRV1    | 0.473982096 | 1.01222118 | 2.135568386 |
| TBX19     | 0.487234474 | 1.03984729 | 2.134182498 |
| ZNF202    | 1.272419343 | 2.7139813  | 2.132929927 |
| IKZF5     | 0.64331692  | 1.36936433 | 2.128599892 |
| KDM2A     | 27.66617975 | 58.8879266 | 2.128516734 |
| AMN1      | 0.527692045 | 1.12274342 | 2.12764894  |
| UBR3      | 1.436354628 | 3.05537264 | 2.127171509 |
| DUSP4     | 3.959772016 | 8.42090847 | 2.126614471 |
| MAX       | 7.413766405 | 15.7636447 | 2.126266709 |
| MET       | 3.928952148 | 8.35285085 | 2.125974187 |
| CHST11    | 0.215777975 | 0.45866058 | 2.125613532 |
| FOXP4     | 13.81556863 | 29.3643515 | 2.125453703 |
| NOMO2     | 1.884321662 | 4.00385116 | 2.124823613 |

|             |             |            |             |
|-------------|-------------|------------|-------------|
| ABHD17C     | 0.1         | 0.21238343 | 2.123834339 |
| BSCL2       | 20.14404072 | 42.7731982 | 2.12336734  |
| ADAM23      | 2.21264588  | 4.69801479 | 2.123256519 |
| ZFYVE16     | 0.181819084 | 0.38595677 | 2.122751703 |
| TRIM5       | 2.738112019 | 5.8118673  | 2.122582004 |
| PDZD11      | 14.02301277 | 29.7625321 | 2.122406402 |
| APBB2       | 1.139157839 | 2.41706985 | 2.12180417  |
| L3MBTL3     | 0.727722779 | 1.54393385 | 2.121596157 |
| HCST        | 0.18159914  | 0.38518807 | 2.121089718 |
| CYB5R1      | 15.43447991 | 32.7082962 | 2.119170608 |
| PRDM8       | 0.144013843 | 0.30510384 | 2.118573015 |
| MICU2       | 7.850809195 | 16.631494  | 2.118443285 |
| BIRC7       | 0.321892399 | 0.68163356 | 2.117582039 |
| AP2A1       | 18.81059747 | 39.8159939 | 2.116678854 |
| FAIM        | 5.206695057 | 11.0180929 | 2.116139458 |
| NOX1        | 0.196021764 | 0.41462029 | 2.115174771 |
| POLN        | 3.344317654 | 7.07274318 | 2.114853884 |
| APIP        | 7.93198627  | 16.7724647 | 2.11453526  |
| ZMYM5       | 0.863644783 | 1.82610137 | 2.114412555 |
| YWHAH       | 51.76932187 | 109.385086 | 2.112932563 |
| ZNF200      | 0.65636977  | 1.38680546 | 2.112841766 |
| UBR1        | 0.640652227 | 1.35286932 | 2.111706262 |
| ENC1        | 5.062824068 | 10.6904652 | 2.111561655 |
| TBC1D19     | 0.641246005 | 1.35321723 | 2.110293426 |
| MEIS2       | 3.383816417 | 7.13745305 | 2.109290863 |
| DDX43       | 1.541181252 | 3.24807008 | 2.107519848 |
| ARMCX6      | 2.075575875 | 4.37428564 | 2.107504571 |
| MARCKS      | 25.32288924 | 53.3667202 | 2.107449891 |
| GPD2        | 3.41290614  | 7.19143383 | 2.107129095 |
| CD2AP       | 2.164042107 | 4.55962052 | 2.106992516 |
| RUFY2       | 0.478344623 | 1.00696915 | 2.105112304 |
| NPAS2       | 1.588034974 | 3.34138691 | 2.104101589 |
| STK38L      | 1.600476616 | 3.36718791 | 2.103865735 |
| RCHY1       | 1.757326191 | 3.69647106 | 2.103463252 |
| ANXA6       | 9.413429127 | 19.7968495 | 2.103043347 |
| LOC10798554 | 0.200089365 | 0.42066026 | 2.102361922 |
| FAM13B      | 0.918678028 | 1.93009829 | 2.100951834 |
| KIFAP3      | 1.800346426 | 3.78188493 | 2.100642897 |
| ROPN1L      | 0.235412105 | 0.49438647 | 2.100089438 |
| ZNF25       | 0.226163259 | 0.47479829 | 2.099360821 |
| DOCK1       | 1.160164669 | 2.43492844 | 2.098778307 |
| NIPAL1      | 0.214503509 | 0.45016491 | 2.098636561 |
| RABL2A      | 1.217929089 | 2.55553492 | 2.098262486 |
| SCLT1       | 0.668529772 | 1.40229388 | 2.097578812 |
| NOTCH2NL    | 0.442091061 | 0.92695969 | 2.096761902 |
| COQ9        | 10.66759592 | 22.3669576 | 2.096719615 |



|          |             |            |             |
|----------|-------------|------------|-------------|
| LCOR     | 0.640426089 | 1.34262043 | 2.096448678 |
| BCKDHB   | 0.840579685 | 1.7616999  | 2.095815458 |
| PPP1R21  | 1.970556981 | 4.12934723 | 2.095522875 |
| ZNF426   | 0.586348908 | 1.22830484 | 2.094836068 |
| PDE8A    | 5.201550882 | 10.8959589 | 2.094751962 |
| NINL     | 3.293015785 | 6.89664323 | 2.094324375 |
| C1QTNF3  | 0.544295161 | 1.13982581 | 2.094131814 |
| DUSP6    | 6.233563405 | 13.0526625 | 2.093932736 |
| CLIP1    | 3.152558239 | 6.6012125  | 2.09392246  |
| SLC37A3  | 2.227938235 | 4.66494865 | 2.093841103 |
| NCDN     | 6.523272878 | 13.6583257 | 2.093784207 |
| PWWP2A   | 0.657174745 | 1.37549422 | 2.093041806 |
| LZTFL1   | 1.161652503 | 2.43124513 | 2.092919461 |
| HYI      | 41.43878472 | 86.7196941 | 2.092718083 |
| LTBR     | 35.08573925 | 73.4227579 | 2.092666691 |
| CHMP1B   | 7.480402225 | 15.6494601 | 2.092061308 |
| WSB1     | 8.220053998 | 17.1893925 | 2.091153236 |
| BOD1L1   | 1.031910916 | 2.15784324 | 2.091113881 |
| KCTD18   | 0.876496428 | 1.83186238 | 2.089982712 |
| GTF3C3   | 3.450274191 | 7.21088154 | 2.089944492 |
| FNBP1    | 5.133723839 | 10.728988  | 2.089903611 |
| ZSCAN32  | 1.079493494 | 2.25603242 | 2.089899042 |
| RFX3     | 0.184530438 | 0.38558516 | 2.089547726 |
| TRMT13   | 0.375562032 | 0.78469408 | 2.08938607  |
| SNX3     | 35.31855977 | 73.7903285 | 2.089279091 |
| GNA12    | 6.591764147 | 13.7663995 | 2.088424164 |
| ZNF830   | 3.067707048 | 6.4064944  | 2.088365773 |
| SYNE2    | 0.231828477 | 0.48394919 | 2.087531262 |
| MTHFD2L  | 0.475679209 | 0.99283631 | 2.087197193 |
| MYH11    | 0.274905676 | 0.57375235 | 2.087088042 |
| FAM127C  | 4.698771803 | 9.8062139  | 2.086973855 |
| GANAB    | 39.11916677 | 81.6253322 | 2.086581566 |
| PRSS3    | 0.736259496 | 1.53615232 | 2.086427853 |
| PTMA     | 157.2298205 | 328.043024 | 2.086391903 |
| PPP1R14B | 138.9266756 | 289.670777 | 2.085062321 |
| SAMHD1   | 1.587761066 | 3.31002385 | 2.084711558 |
| ZSCAN18  | 0.369452674 | 0.77007999 | 2.084380608 |
| HERC2    | 1.21473278  | 2.53155695 | 2.084044323 |
| GOLGA8A  | 0.701628255 | 1.46196572 | 2.08367567  |
| CSTF2T   | 1.621436814 | 3.37820563 | 2.083464245 |
| ZNF37A   | 0.572647552 | 1.19279395 | 2.08294604  |
| CLGN     | 5.607334734 | 11.6789186 | 2.082793184 |
| NCAM2    | 0.198360912 | 0.4130765  | 2.082449075 |
| AKAP9    | 1.013187822 | 2.1097928  | 2.082331386 |
| DOCK9    | 0.71988769  | 1.49862687 | 2.081750931 |
| C19orf68 | 1.471886809 | 3.06377469 | 2.081528737 |

|           |             |            |             |
|-----------|-------------|------------|-------------|
| DBN1      | 120.7805594 | 251.392885 | 2.08140189  |
| TOP2B     | 7.528971174 | 15.6694236 | 2.081217107 |
| SRGAP3    | 0.262926434 | 0.54670491 | 2.079307513 |
| MYCBP     | 3.105902359 | 6.44885345 | 2.076322019 |
| IER5L     | 41.27510676 | 85.6961997 | 2.07621994  |
| KANSL2    | 4.169359714 | 8.65564207 | 2.076012304 |
| TBC1D9    | 5.843413336 | 12.128428  | 2.075572499 |
| TMX4      | 3.369896236 | 6.99309371 | 2.075165887 |
| TAF1      | 0.274513511 | 0.56964051 | 2.07509098  |
| HERC3     | 0.296773361 | 0.6157905  | 2.074952066 |
| NEURL1B   | 0.326811059 | 0.67801193 | 2.074629709 |
| RGMB      | 0.477235461 | 0.98994272 | 2.074327662 |
| NR1D2     | 1.163693842 | 2.41361147 | 2.074094902 |
| FANCM     | 0.364251975 | 0.75542801 | 2.073916039 |
| PALMD     | 2.360720319 | 4.89421277 | 2.073186194 |
| STRIP2    | 0.736622106 | 1.52689386 | 2.072831984 |
| CPSF6     | 6.09880989  | 12.6400542 | 2.072544379 |
| PLXNA2    | 1.866631161 | 3.86817306 | 2.072274987 |
| DHX57     | 1.594510026 | 3.30420654 | 2.072239423 |
| HBEGF     | 2.056718311 | 4.26171393 | 2.072094126 |
| RGL4      | 0.562951378 | 1.16641556 | 2.071965013 |
| EPCAM     | 6.920130224 | 14.3338394 | 2.071325102 |
| FRK       | 0.981056214 | 2.03181338 | 2.071046845 |
| HIST1H4C  | 1.033996311 | 2.14019157 | 2.06982515  |
| COL26A1   | 0.29367963  | 0.60768108 | 2.069197247 |
| PCYOX1L   | 1.021340535 | 2.1125467  | 2.068405812 |
| TAF15     | 29.58205609 | 61.1828328 | 2.068241389 |
| SH3YL1    | 0.207896493 | 0.42995989 | 2.068144035 |
| GNMT      | 0.382108551 | 0.79017633 | 2.067936788 |
| HKR1      | 1.333549166 | 2.75735935 | 2.067684805 |
| CCDC71L   | 0.141168463 | 0.29184442 | 2.067348534 |
| AFTPH     | 1.984299057 | 4.10023982 | 2.066341669 |
| GVQW2     | 0.256699234 | 0.53030589 | 2.065864724 |
| MIB1      | 1.419915347 | 2.93327952 | 2.065812957 |
| HIST1H2AG | 0.1         | 0.20651603 | 2.065160257 |
| ARMCX1    | 1.092452876 | 2.25549432 | 2.064614745 |
| SNX13     | 0.845145636 | 1.74480561 | 2.064502889 |
| FAM188A   | 1.403618886 | 2.89762566 | 2.064396318 |
| ABAT      | 0.393441376 | 0.81220436 | 2.064359294 |
| CRYAB     | 1.721629656 | 3.55367989 | 2.06413724  |
| MTCP1     | 0.414016001 | 0.85451912 | 2.063976081 |
| CEP55     | 6.024577205 | 12.4318588 | 2.063523853 |
| FRZB      | 0.187667524 | 0.38724719 | 2.063474706 |
| SPATA17   | 0.206836358 | 0.42671788 | 2.063069958 |
| MYCBP2    | 0.734445761 | 1.51512963 | 2.062956466 |
| SPIRE1    | 3.57092137  | 7.3620561  | 2.061668497 |

|           |             |            |             |
|-----------|-------------|------------|-------------|
| EIF1B     | 37.47369627 | 77.2563357 | 2.061615037 |
| SPINK5    | 1.182113682 | 2.43592576 | 2.060652709 |
| CNBD1     | 0.224405246 | 0.4623291  | 2.060241957 |
| MIS18BP1  | 0.817341694 | 1.68343226 | 2.059643201 |
| CEP41     | 1.653780481 | 3.40406603 | 2.058354217 |
| MIA3      | 2.389008731 | 4.91532247 | 2.05747363  |
| NIPA1     | 1.690567976 | 3.47742604 | 2.056957244 |
| SIRT5     | 1.424430644 | 2.92875394 | 2.056087425 |
| FAM214B   | 6.971765798 | 14.3339233 | 2.055996104 |
| INSIG2    | 1.38340754  | 2.84336065 | 2.055331182 |
| HIST1H2AC | 29.12059967 | 59.8484674 | 2.055193508 |
| CCDC96    | 1.199712331 | 2.46521977 | 2.054842401 |
| CTHRC1    | 1.523997504 | 3.12758686 | 2.052225714 |
| ARHGAP26  | 0.470255486 | 0.9644603  | 2.050928321 |
| TPBG      | 0.240250486 | 0.49213909 | 2.048441582 |
| 44445     | 1.040826861 | 2.13202086 | 2.048391464 |
| FAM83D    | 3.824065161 | 7.83072178 | 2.047747999 |
| RSU1      | 10.07547858 | 20.6257942 | 2.047127986 |
| PODXL     | 0.3130523   | 0.64073259 | 2.046726989 |
| TPR       | 3.24555103  | 6.64046581 | 2.046021074 |
| DCLRE1B   | 0.500671596 | 1.02422617 | 2.045704567 |
| C10orf131 | 0.203247892 | 0.41574393 | 2.045501827 |
| ATP8      | 924.5307452 | 1891.01263 | 2.045375597 |
| WDR3      | 1.728531097 | 3.53417338 | 2.044610816 |
| ASH1L     | 0.827032121 | 1.69035827 | 2.043884661 |
| ZNF737    | 0.302582921 | 0.61837545 | 2.043656172 |
| ATR       | 0.818845385 | 1.67339496 | 2.043603089 |
| MYO6      | 2.80658244  | 5.73180079 | 2.042270595 |
| ANKRD36   | 0.150155591 | 0.30659558 | 2.041852589 |
| ABI1      | 5.413122641 | 11.0507625 | 2.041476467 |
| C16orf45  | 0.43484382  | 0.88768533 | 2.041388867 |
| ZNF107    | 0.507130332 | 1.03482265 | 2.040545762 |
| DDX59     | 0.431546021 | 0.88054659 | 2.040446558 |
| LOC285500 | 0.501351929 | 1.02284239 | 2.040168462 |
| MTMR3     | 1.797536892 | 3.66716598 | 2.0401061   |
| MFN1      | 2.612530982 | 5.32791726 | 2.039369982 |
| FOPNL     | 4.735102026 | 9.65249862 | 2.038498551 |
| YWHAQ     | 48.55468441 | 98.9651129 | 2.038219671 |
| DCAF17    | 0.932781348 | 1.90090984 | 2.037894355 |
| IER5      | 5.984336282 | 12.1947992 | 2.037786421 |
| COMMD3-BM | 3.952596945 | 8.05361578 | 2.037550474 |
| KIAA1109  | 0.249393443 | 0.5079128  | 2.03659245  |
| ZNF75A    | 2.912044478 | 5.93043229 | 2.036518446 |
| ACAP2     | 1.306317215 | 2.65975374 | 2.036070342 |
| SZRD1     | 12.86742701 | 26.1858482 | 2.035049294 |
| KLRF1     | 0.144346063 | 0.29373623 | 2.034944547 |

|           |             |            |             |
|-----------|-------------|------------|-------------|
| AP2B1     | 21.68374013 | 44.1207664 | 2.034739676 |
| CREM      | 2.883869076 | 5.86525034 | 2.033812973 |
| NRIP1     | 1.081789509 | 2.19977718 | 2.033461372 |
| POLR3D    | 8.975143798 | 18.2491381 | 2.03329757  |
| FLNB      | 22.21994179 | 45.1711153 | 2.032908804 |
| FASTKD5   | 4.743883162 | 9.64179711 | 2.032469346 |
| ZIK1      | 0.257373257 | 0.52309057 | 2.032420078 |
| C1GALT1C1 | 5.520514307 | 11.2160438 | 2.031702691 |
| REEP3     | 1.448006491 | 2.94188836 | 2.031681748 |
| ARMCX3    | 1.187386724 | 2.41237833 | 2.03167029  |
| ZNF222    | 1.374373976 | 2.79091156 | 2.030678413 |
| TRIB1     | 5.34820299  | 10.8570041 | 2.030028423 |
| ZNF621    | 1.066146131 | 2.16352041 | 2.029290686 |
| RAB3GAP1  | 3.357357048 | 6.81251529 | 2.029130411 |
| AGO2      | 0.838889194 | 1.70193851 | 2.028800136 |
| KMT2C     | 0.540672614 | 1.09674758 | 2.028487383 |
| TMTC3     | 1.726681067 | 3.50230198 | 2.028343302 |
| JAG2      | 0.932353182 | 1.8908931  | 2.028086709 |
| SSUH2     | 0.781734219 | 1.58529041 | 2.027914819 |
| SDAD1     | 4.743193899 | 9.61699305 | 2.027535297 |
| INTS12    | 3.208784558 | 6.50426496 | 2.027018282 |
| RBM23     | 0.361593266 | 0.73295304 | 2.027009641 |
| CDR2L     | 5.42240545  | 10.9910226 | 2.02696437  |
| MBD1      | 5.046913057 | 10.2269748 | 2.026382202 |
| NBN       | 1.706418296 | 3.4574194  | 2.026126544 |
| PDGFC     | 2.275977069 | 4.61115673 | 2.026011944 |
| CUZD1     | 0.233193857 | 0.47240882 | 2.025820156 |
| EML1      | 0.811905983 | 1.64354559 | 2.024305303 |
| NEU4      | 5.250985971 | 10.6294496 | 2.024276904 |
| ZNF721    | 1.044546568 | 2.11236287 | 2.022277354 |
| ZNF284    | 0.509095419 | 1.0293595  | 2.021938252 |
| PTPN21    | 0.950609218 | 1.92059454 | 2.020382829 |
| KLHDC10   | 2.928972984 | 5.91698609 | 2.020157278 |
| EIF4G3    | 2.437748859 | 4.9245494  | 2.020121713 |
| TRDMT1    | 0.386810708 | 0.78131886 | 2.019899785 |
| ABCC5     | 5.881881927 | 11.8806381 | 2.019870206 |
| TTC37     | 1.228196807 | 2.4807004  | 2.01979063  |
| DDX5      | 31.97223901 | 64.5184923 | 2.017953522 |
| RNF44     | 5.830369856 | 11.7614658 | 2.017276107 |
| PTPRM     | 3.369558691 | 6.79670854 | 2.017091603 |
| CACNB3    | 1.436212504 | 2.89588373 | 2.016333737 |
| ELF5      | 0.124769384 | 0.25149525 | 2.015680812 |
| BOC       | 0.505069293 | 1.01800113 | 2.015567255 |
| SLC25A24  | 1.875139188 | 3.77813986 | 2.014858353 |
| MEMO1     | 5.367799228 | 10.8112789 | 2.014098977 |
| FHDC1     | 0.825043658 | 1.66166309 | 2.014030503 |

|             |             |            |             |
|-------------|-------------|------------|-------------|
| AHDC1       | 1.401562594 | 2.82226017 | 2.013652607 |
| PPP2R2C     | 0.168397657 | 0.33904903 | 2.013383328 |
| FBXO36      | 0.637254515 | 1.28295001 | 2.01324586  |
| RSPRY1      | 2.444168777 | 4.92004103 | 2.012971067 |
| LRRC8A      | 12.08939877 | 24.3274103 | 2.012292816 |
| HNRNPH1     | 28.41363533 | 57.1730189 | 2.012168391 |
| JAK2        | 0.201445942 | 0.40530902 | 2.011998956 |
| KLHL9       | 1.173291319 | 2.3603029  | 2.011693824 |
| FBXO11      | 2.247716257 | 4.52148616 | 2.011591165 |
| MECOM       | 0.882972887 | 1.77609483 | 2.011494189 |
| PAIP1       | 12.75872325 | 25.6549317 | 2.010775783 |
| CREBRF      | 0.374291085 | 0.75241066 | 2.010228635 |
| SGPL1       | 2.651006698 | 5.32836574 | 2.009940504 |
| WDR37       | 1.429795225 | 2.87246592 | 2.009005117 |
| BAHD1       | 2.342304878 | 4.70526367 | 2.008817774 |
| RAB6B       | 2.458084555 | 4.93614553 | 2.008126822 |
| TOMM34      | 17.53702229 | 35.2122296 | 2.007879618 |
| SMURF2      | 0.590352076 | 1.18478308 | 2.006909306 |
| BMI1        | 3.002740723 | 6.02309844 | 2.005866972 |
| SUPT3H      | 0.886893652 | 1.77889163 | 2.005755287 |
| TNRC6B      | 0.5649544   | 1.1330423  | 2.005546458 |
| ARHGAP32    | 0.301621141 | 0.6046915  | 2.004804754 |
| SENP7       | 0.450853537 | 0.9033915  | 2.003736082 |
| PPP1CB      | 6.285430846 | 12.5899333 | 2.003034258 |
| COG5        | 3.518004503 | 7.04658944 | 2.00300751  |
| SESTD1      | 1.523611338 | 3.04976396 | 2.001667935 |
| CPE         | 0.1         | 0.20016046 | 2.001604623 |
| ITGA5       | 18.7843215  | 37.5934406 | 2.00132012  |
| RLIM        | 0.55122505  | 1.10310858 | 2.001194583 |
| LRRC63      | 0.320533639 | 0.64136894 | 2.000941141 |
| SAA4        | 34.06094858 | 0.73813511 | 0.021671009 |
| SAA2-SAA4   | 18.09865833 | 0.53684102 | 0.029661923 |
| CPA2        | 8.270712092 | 0.33930067 | 0.041024359 |
| HPR         | 7.480977291 | 0.31354662 | 0.041912522 |
| ESPN        | 5.314812738 | 0.25868157 | 0.048671812 |
| RBP2        | 2.041300473 | 0.1        | 0.048988378 |
| OXT         | 7.57197049  | 0.42643065 | 0.056316999 |
| LOC10537009 | 1.808209348 | 0.10746272 | 0.059430461 |
| HP          | 11.08477706 | 0.72276566 | 0.065203446 |
| IHH         | 22.13365815 | 1.45684555 | 0.065820369 |
| APOA1       | 4639.077751 | 305.919229 | 0.065943975 |
| KISS1       | 2.565802587 | 0.17429269 | 0.067929112 |
| CDKN1C      | 45.71095976 | 3.12328906 | 0.068326919 |
| F12         | 52.75853899 | 3.61736587 | 0.068564557 |
| SHBG        | 2.493409805 | 0.22064817 | 0.088492543 |
| PCOLCE      | 12.42932785 | 1.11505827 | 0.089711872 |

|             |             |            |             |
|-------------|-------------|------------|-------------|
| AQP10       | 2.002304751 | 0.18597242 | 0.092879176 |
| RAB17       | 35.58114349 | 3.31427098 | 0.093146837 |
| TFF3        | 9.143104703 | 0.85490959 | 0.093503205 |
| AVP         | 1.596566183 | 0.14934417 | 0.093540857 |
| SLC5A9      | 1.704827678 | 0.17608911 | 0.103288511 |
| PPP1R1A     | 2.582678308 | 0.27353865 | 0.105912784 |
| SLC19A3     | 13.93887908 | 1.48614976 | 0.106619029 |
| PGLYRP2     | 0.917561219 | 0.1        | 0.108984554 |
| ITIH1       | 2.737748734 | 0.29962189 | 0.109440975 |
| MRGPRF      | 1.942974864 | 0.21366782 | 0.109969419 |
| ACTN3       | 2.125625301 | 0.23746675 | 0.111716184 |
| SMPD5       | 1.654927044 | 0.1886052  | 0.113965871 |
| AGXT        | 0.85982178  | 0.1        | 0.116303172 |
| FTCD        | 4.682205104 | 0.5517781  | 0.117845778 |
| PDZK1IP1    | 0.846988101 | 0.1        | 0.118065413 |
| SLC13A5     | 2.241177314 | 0.27740796 | 0.123777784 |
| PLEKHF1     | 1.932975508 | 0.24079623 | 0.124572832 |
| SLC38A3     | 10.9494521  | 1.37769573 | 0.125823257 |
| FAM3B       | 0.784967604 | 0.1        | 0.127393792 |
| CYGB        | 2.309152952 | 0.29546746 | 0.127954909 |
| SCGN        | 54.41925916 | 6.97222424 | 0.128120528 |
| APOD        | 1.872939901 | 0.24082738 | 0.128582547 |
| SPATA25     | 0.775491074 | 0.1        | 0.128950549 |
| TFR2        | 4.984911829 | 0.64805397 | 0.130003095 |
| SARDH       | 14.36217108 | 1.88791204 | 0.131450324 |
| SOAT2       | 9.863593051 | 1.3233621  | 0.134166332 |
| KHK         | 5.539176484 | 0.76409992 | 0.137944678 |
| CLDN3       | 0.719487349 | 0.1        | 0.13898785  |
| C2orf54     | 0.869391021 | 0.12100791 | 0.139186983 |
| SMIM1       | 11.0876897  | 1.55461556 | 0.140210955 |
| ITGAL       | 2.80390946  | 0.40549999 | 0.144619501 |
| GJB1        | 13.01340204 | 1.94631701 | 0.149562505 |
| DUOXA2      | 0.668139467 | 0.1        | 0.14966935  |
| CD7         | 16.95120133 | 2.54032599 | 0.149861119 |
| FOXE3       | 1.172610605 | 0.18033061 | 0.153785589 |
| KRT222      | 0.834815542 | 0.13057348 | 0.156409973 |
| ANPEP       | 65.63331919 | 10.2875391 | 0.15674263  |
| KRT4        | 0.637254515 | 0.1        | 0.156923172 |
| KNG1        | 4.588789007 | 0.72131749 | 0.157191252 |
| HIST1H1E    | 1.492070935 | 0.23514645 | 0.157597365 |
| GCGR        | 0.630338135 | 0.1        | 0.15864501  |
| HCAR3       | 3.253384832 | 0.52197692 | 0.160441185 |
| APOC3       | 153.4120774 | 24.7813419 | 0.161534491 |
| TMEM82      | 7.106818177 | 1.14831978 | 0.161580014 |
| LOC10537106 | 0.61888684  | 0.1        | 0.161580427 |
| FAM19A4     | 0.761614649 | 0.12312336 | 0.161660962 |

|           |             |            |             |
|-----------|-------------|------------|-------------|
| MROH6     | 1.015034836 | 0.16526605 | 0.162818105 |
| C12orf57  | 171.3957893 | 28.1898682 | 0.16447235  |
| SLC30A10  | 6.475557304 | 1.07730265 | 0.166364469 |
| ENTPD8    | 1.564911145 | 0.26786386 | 0.171168736 |
| OCA2      | 1.501882537 | 0.25851529 | 0.172127504 |
| CPN1      | 12.30418301 | 2.12392581 | 0.17261819  |
| CHST13    | 159.0887891 | 27.8713072 | 0.175193408 |
| SLC39A5   | 17.58782321 | 3.08145091 | 0.175203655 |
| REEP6     | 324.1654281 | 58.3219855 | 0.179914267 |
| CLDN19    | 0.555070385 | 0.1        | 0.180157333 |
| HIST1H2BB | 1.226863299 | 0.2230742  | 0.181824822 |
| ASGR1     | 97.0176425  | 17.6993653 | 0.182434502 |
| MMEL1     | 1.631624352 | 0.30073786 | 0.184318078 |
| DDC       | 19.16345128 | 3.55945527 | 0.18574187  |
| SULT2A1   | 22.12905744 | 4.13109819 | 0.186682067 |
| FABP1     | 214.5013111 | 40.4886345 | 0.188757049 |
| DUSP15    | 1.689552748 | 0.31929482 | 0.188981861 |
| PCP2      | 0.839543037 | 0.15874306 | 0.189082692 |
| TFF2      | 0.528741245 | 0.1        | 0.189128427 |
| MYL4      | 1.930445032 | 0.36655769 | 0.189882481 |
| LCN10     | 0.521386536 | 0.1        | 0.191796284 |
| GCKR      | 7.199908004 | 1.38432343 | 0.192269599 |
| RARRES1   | 0.661261266 | 0.12724447 | 0.19242692  |
| BAIAP2L2  | 1.425759082 | 0.27484955 | 0.192774185 |
| INPP5J    | 7.439202164 | 1.43759902 | 0.193246398 |
| PLEKHG6   | 10.54781634 | 2.04769246 | 0.194134255 |
| CA5A      | 0.710148344 | 0.13807967 | 0.194437784 |
| RTN4R     | 20.85331043 | 4.08044671 | 0.19567381  |
| PLK5      | 0.508291197 | 0.1        | 0.196737619 |
| SECTM1    | 7.336220326 | 1.44820722 | 0.197405089 |
| TM7SF2    | 157.9226247 | 31.410123  | 0.198895649 |
| SLC47A1   | 6.968960368 | 1.39417459 | 0.200054888 |
| MST1      | 8.20238818  | 1.65815397 | 0.202155023 |
| NUDT8     | 24.20734327 | 4.90608887 | 0.202669447 |
| SEZ6L2    | 1.58488871  | 0.32369264 | 0.204236825 |
| SLC34A3   | 2.08608411  | 0.42830669 | 0.205316117 |
| PNMA6A    | 7.02912101  | 1.45057458 | 0.206366426 |
| CITED4    | 11.80931859 | 2.44203246 | 0.2067886   |
| AFM       | 0.738410098 | 0.15312467 | 0.207370766 |
| LBX2      | 5.744502501 | 1.19597068 | 0.208193952 |
| C1QL1     | 3.702112441 | 0.77190309 | 0.208503416 |
| C1orf54   | 0.478844058 | 0.1        | 0.208836256 |
| CGREF1    | 6.485534367 | 1.36428452 | 0.210358074 |
| MLXIPL    | 1.631829797 | 0.3461484  | 0.21212286  |
| LCN12     | 3.62012493  | 0.77145545 | 0.213101887 |
| TMEM52    | 9.225475442 | 1.98259848 | 0.214904749 |

|          |             |            |             |
|----------|-------------|------------|-------------|
| IRX3     | 0.987063496 | 0.21342476 | 0.216221919 |
| SEMA3F   | 3.493093449 | 0.76851209 | 0.220009026 |
| PRAP1    | 6.038149006 | 1.32884125 | 0.220074273 |
| DAB1     | 0.547087382 | 0.12056007 | 0.220367119 |
| TMPRSS6  | 1.202431463 | 0.26607696 | 0.221282433 |
| LYPD6B   | 1.33363429  | 0.29597899 | 0.22193415  |
| ITPKA    | 57.82188128 | 12.8376806 | 0.222021151 |
| EMILIN3  | 4.129338673 | 0.91778256 | 0.222258971 |
| ATAD3C   | 0.571959784 | 0.12749157 | 0.222903029 |
| CLIC3    | 5.245933259 | 1.17053443 | 0.22313178  |
| 44264    | 7.645501188 | 1.71711667 | 0.224591773 |
| ASS1     | 5.783327122 | 1.30556775 | 0.225746827 |
| HSD17B2  | 5.535501904 | 1.2523926  | 0.226247344 |
| PGF      | 111.9889459 | 25.4150301 | 0.22694231  |
| PRODH    | 6.907157501 | 1.57591932 | 0.228157432 |
| CRACR2B  | 7.316195644 | 1.68856534 | 0.230798276 |
| DUSP26   | 1.058401223 | 0.24437937 | 0.23089483  |
| PNMA3    | 23.36019629 | 5.40732866 | 0.231476165 |
| JSRP1    | 0.72346352  | 0.16809369 | 0.232345765 |
| KANK4    | 1.430138986 | 0.33244103 | 0.232453654 |
| TMC4     | 0.61345347  | 0.14272653 | 0.232660719 |
| FOXH1    | 9.305190398 | 2.16542527 | 0.232711549 |
| ANO9     | 1.76834038  | 0.41157111 | 0.232744279 |
| CST7     | 0.42639656  | 0.1        | 0.234523468 |
| PTP4A3   | 3.279123091 | 0.7693373  | 0.234616779 |
| WNT11    | 2.235869194 | 0.52598264 | 0.2352475   |
| C22orf24 | 0.885753028 | 0.20840255 | 0.235282909 |
| UPK3A    | 0.854519009 | 0.20142444 | 0.235716743 |
| NRAP     | 7.229420805 | 1.71003736 | 0.236538639 |
| CPB2     | 21.79187922 | 5.20625523 | 0.238908044 |
| GDPD3    | 1.814027839 | 0.43817383 | 0.241547467 |
| AIFM3    | 1.224717666 | 0.29654377 | 0.242132356 |
| ANGPTL6  | 0.848013739 | 0.2054153  | 0.242231103 |
| CLDN14   | 1.194151189 | 0.2912023  | 0.243857145 |
| GAMT     | 490.9602039 | 120.103399 | 0.244629602 |
| CLDN5    | 0.577090454 | 0.14168564 | 0.245517219 |
| GC       | 20.44946831 | 5.02253118 | 0.245606932 |
| ITPRIPL1 | 1.447803557 | 0.35600859 | 0.245895649 |
| GGT5     | 0.745086    | 0.18350253 | 0.246283688 |
| SLC22A31 | 3.374568741 | 0.83154279 | 0.246414537 |
| GLUD1    | 126.1943452 | 31.1678278 | 0.246982761 |
| LRG1     | 2.930848371 | 0.72581157 | 0.247645555 |
| HCAR2    | 1.128978987 | 0.27981349 | 0.247846503 |
| CXCL6    | 1.819926902 | 0.45171476 | 0.248204893 |
| SERPINF2 | 164.0240342 | 40.7730389 | 0.248579661 |
| TNFRSF14 | 0.880331108 | 0.22121104 | 0.251281633 |



|             |             |            |             |
|-------------|-------------|------------|-------------|
| RSPH9       | 0.807985542 | 0.20310006 | 0.251365958 |
| LOC10798497 | 2.970689188 | 0.75028873 | 0.252563861 |
| GALNT1      | 23.62074678 | 5.97362788 | 0.252897503 |
| C15orf62    | 1.319561274 | 0.3344294  | 0.253439845 |
| SARM1       | 3.881374525 | 0.98589838 | 0.254007536 |
| RBP1        | 2.631274468 | 0.67075971 | 0.254918185 |
| RHBDL1      | 3.991651297 | 1.01808621 | 0.255053894 |
| RNF208      | 81.66640953 | 20.9338225 | 0.256333328 |
| PER1        | 4.689652717 | 1.20393037 | 0.256720581 |
| ALDOC       | 35.9247002  | 9.23094373 | 0.256952561 |
| SLC46A1     | 7.861722273 | 2.02014333 | 0.256959386 |
| VTN         | 1002.71554  | 258.623154 | 0.257922755 |
| VWCE        | 11.77495389 | 3.04027609 | 0.258198556 |
| GCHFR       | 199.3438134 | 51.5826462 | 0.258762212 |
| TRPM2       | 0.61597455  | 0.15954376 | 0.259010306 |
| PDZK1       | 15.32361219 | 3.97290603 | 0.259266939 |
| VAX2        | 4.719616267 | 1.2282785  | 0.260249654 |
| TBX1        | 2.290106791 | 0.5975359  | 0.260920538 |
| FADS6       | 0.524543778 | 0.13709439 | 0.261359295 |
| FOLH1       | 0.80461653  | 0.21081821 | 0.26201078  |
| GRB7        | 0.441166946 | 0.11568914 | 0.262234378 |
| AGPAT3      | 8.050190413 | 2.11379353 | 0.262576836 |
| ATP6V1B1    | 2.245021747 | 0.59321228 | 0.264234537 |
| PRR5        | 75.25089256 | 20.1267631 | 0.267462118 |
| TMEM151A    | 2.091664071 | 0.5612607  | 0.268332143 |
| ALDH3A1     | 1.273650901 | 0.3423848  | 0.268821541 |
| TF          | 249.757309  | 67.142812  | 0.26883222  |
| TMEM86B     | 109.6618746 | 29.4852835 | 0.268874516 |
| SH3BP1      | 8.183636553 | 2.20038356 | 0.268876012 |
| ACY3        | 5.777891245 | 1.55708907 | 0.269490893 |
| CERS4       | 36.8425655  | 9.9536147  | 0.270166167 |
| LCAT        | 31.66548834 | 8.56212397 | 0.270392924 |
| GOLT1A      | 17.01347794 | 4.60551932 | 0.270698286 |
| BIN1        | 57.11747072 | 15.5016567 | 0.271399565 |
| GHRL        | 1.19155571  | 0.32441028 | 0.272257756 |
| RPS6KL1     | 5.697685304 | 1.56014095 | 0.273820134 |
| APOA5       | 0.608031466 | 0.16658366 | 0.2739721   |
| NEURL3      | 0.560620336 | 0.15366209 | 0.274092974 |
| AFP         | 7186.212193 | 1977.51491 | 0.275181814 |
| GAL3ST3     | 0.593723954 | 0.16390962 | 0.27607041  |
| ZASP        | 31.88794313 | 8.82699971 | 0.276813079 |
| C2CD4C      | 0.974500388 | 0.26979827 | 0.276858047 |
| B3GNT7      | 1.205336324 | 0.33412957 | 0.27720858  |
| ADM2        | 1.253380592 | 0.3486688  | 0.2781827   |
| MIXL1       | 1.296251433 | 0.36130532 | 0.278730897 |
| FGA         | 447.4837252 | 125.010978 | 0.279364302 |

|             |             |            |             |
|-------------|-------------|------------|-------------|
| LRRC71      | 0.599993691 | 0.16897917 | 0.28163491  |
| ABCA7       | 9.949142628 | 2.80574369 | 0.28200859  |
| ACOT4       | 1.505318524 | 0.42743815 | 0.283951965 |
| C15orf48    | 0.545926885 | 0.15566105 | 0.28513168  |
| FAM20A      | 3.630088295 | 1.03774939 | 0.285874422 |
| CTSH        | 16.23909604 | 4.65436704 | 0.286614909 |
| FBLN5       | 8.677188731 | 2.49451843 | 0.287480025 |
| PIPOX       | 0.653737448 | 0.18796846 | 0.287528976 |
| ANKRD53     | 0.581365051 | 0.16729462 | 0.287761735 |
| MVB12B      | 11.60961078 | 3.34297227 | 0.287948695 |
| CCNE1       | 15.64989258 | 4.52041507 | 0.288846396 |
| CXCL16      | 11.1571041  | 3.24441897 | 0.290794003 |
| APOA4       | 11.28556541 | 3.29723172 | 0.292163627 |
| PLAU        | 2.992025338 | 0.87597684 | 0.292770528 |
| KCND1       | 1.296188072 | 0.38095858 | 0.293906874 |
| CX3CL1      | 14.48151644 | 4.27261603 | 0.29503927  |
| ASB9        | 1.719757585 | 0.50824767 | 0.295534485 |
| BST2        | 0.338311129 | 0.1        | 0.295585901 |
| C2orf48     | 1.280999542 | 0.37889054 | 0.295777265 |
| ANXA9       | 11.15024145 | 3.29898459 | 0.29586665  |
| MSANTD1     | 3.758523737 | 1.112792   | 0.296071563 |
| FOXA3       | 111.2943975 | 32.9830877 | 0.296358922 |
| PI3         | 1.305428452 | 0.38724719 | 0.296643748 |
| CPT1B       | 4.155594072 | 1.23900266 | 0.298152956 |
| SYTL1       | 2.676086007 | 0.80026377 | 0.299042621 |
| 44444       | 10.49055446 | 3.14183834 | 0.299492114 |
| NUPR1       | 1.497922111 | 0.44898014 | 0.299735302 |
| CDX2        | 3.670185572 | 1.10112245 | 0.300018195 |
| URAD        | 0.332604445 | 0.1        | 0.300657437 |
| RCN3        | 13.9326036  | 4.20333888 | 0.30169084  |
| UBA7        | 1.071209566 | 0.32415627 | 0.302607709 |
| ENHO        | 7.308580065 | 2.21589441 | 0.303190824 |
| ELOVL3      | 0.402163883 | 0.12200124 | 0.303361991 |
| ZBTB16      | 0.833734792 | 0.25433857 | 0.305059327 |
| BARX1       | 0.796400758 | 0.24317134 | 0.305337904 |
| UBD         | 1.725059239 | 0.52864631 | 0.306451105 |
| EBF4        | 16.2419974  | 4.98356402 | 0.306831968 |
| MT1M        | 14.03564951 | 4.31948711 | 0.307751138 |
| DUSP9       | 317.8909019 | 98.2789805 | 0.309159463 |
| NRROS       | 0.860654788 | 0.26615499 | 0.309247093 |
| CHAC1       | 1.50721292  | 0.46624843 | 0.309344767 |
| LOC10537437 | 1.001183972 | 0.30997518 | 0.309608616 |
| MVD         | 896.5643245 | 278.325876 | 0.310436037 |
| PHGDH       | 126.6936478 | 39.4664237 | 0.311510675 |
| LCN15       | 2.330804838 | 0.72651552 | 0.311701567 |
| FAM83H      | 7.198751832 | 2.24391254 | 0.311708557 |

|           |             |            |             |
|-----------|-------------|------------|-------------|
| EXOC3L4   | 27.0738364  | 8.44982361 | 0.312102928 |
| RAB26     | 2.686569055 | 0.83884857 | 0.312237857 |
| CHST3     | 9.346007094 | 2.92604484 | 0.313079672 |
| TMEM97    | 104.9982749 | 32.9151012 | 0.313482305 |
| LTK       | 1.906272227 | 0.59838692 | 0.31390423  |
| NUCKS1    | 46.03617533 | 14.4526719 | 0.313941631 |
| NXPH2     | 0.977445753 | 0.30720696 | 0.314295658 |
| PFKFB4    | 3.3442551   | 1.05336055 | 0.314976135 |
| TMEM249   | 1.581652471 | 0.49833528 | 0.315072549 |
| OGDHL     | 0.400766709 | 0.12627941 | 0.31509455  |
| ACP5      | 15.02346097 | 4.78314026 | 0.318378053 |
| OPLAH     | 18.56523936 | 5.91314858 | 0.318506455 |
| KRT23     | 0.539527676 | 0.17200676 | 0.318809894 |
| MIOX      | 1.109263413 | 0.35408979 | 0.319211639 |
| RND2      | 6.475109697 | 2.06746798 | 0.319294664 |
| ATP2B2    | 3.064956018 | 0.97875721 | 0.319338094 |
| HIST1H3A  | 3.853908415 | 1.23102305 | 0.319421977 |
| S1PR2     | 2.861074475 | 0.91402733 | 0.319469953 |
| CCL20     | 23.31679667 | 7.47085838 | 0.320406722 |
| TMEM89    | 2.376616009 | 0.76306226 | 0.321070908 |
| CCDC154   | 1.291474071 | 0.41473517 | 0.321133173 |
| PRSS50    | 1.046477331 | 0.33628054 | 0.321345268 |
| AMIGO1    | 0.633269415 | 0.20354281 | 0.321415821 |
| CMTM1     | 1.243309986 | 0.39968916 | 0.321471847 |
| AFF3      | 2.221109451 | 0.71414783 | 0.321527528 |
| HUS1B     | 0.632541756 | 0.20340152 | 0.321562205 |
| SMCO4     | 28.55224531 | 9.18993921 | 0.321863976 |
| KIF5C     | 2.464522136 | 0.79374723 | 0.322069428 |
| ACSS2     | 63.86120351 | 20.5930675 | 0.32246601  |
| RBM14-RBM | 11.61002889 | 3.74807489 | 0.322830798 |
| GP1BB     | 14.86552624 | 4.80649621 | 0.323331723 |
| PINLYP    | 0.439296065 | 0.14235128 | 0.324044064 |
| RNF215    | 4.3010396   | 1.39714573 | 0.324839077 |
| DBP       | 2.915913782 | 0.94942266 | 0.32560039  |
| HSD17B8   | 1.027425483 | 0.33457077 | 0.325639937 |
| TNFSF12   | 1.407594836 | 0.45907372 | 0.326140523 |
| HOXA3     | 3.524959743 | 1.15224287 | 0.326881142 |
| GPX2      | 8.451110759 | 2.76454695 | 0.327122319 |
| PIGZ      | 3.614712458 | 1.19003715 | 0.329220418 |
| CCDC78    | 1.648200407 | 0.54351991 | 0.329765667 |
| AMHR2     | 0.638656537 | 0.21074109 | 0.329975621 |
| NOXA1     | 2.63416422  | 0.87016306 | 0.330337438 |
| PARP10    | 1.798407993 | 0.59465972 | 0.330658963 |
| RAB37     | 1.455751624 | 0.48324781 | 0.331957596 |
| TSPO      | 21.59667161 | 7.19895654 | 0.33333639  |
| HABP2     | 34.87915349 | 11.6277491 | 0.333372457 |

|          |             |            |             |
|----------|-------------|------------|-------------|
| SLC51B   | 6.041806321 | 2.01864824 | 0.334113365 |
| HGFAC    | 1.266401204 | 0.42314187 | 0.334129396 |
| HSPA12B  | 0.601414792 | 0.20110225 | 0.334381949 |
| APOE     | 5896.950882 | 1974.13399 | 0.334771992 |
| KCNE5    | 1.053122516 | 0.35345725 | 0.33562785  |
| VWA5B2   | 0.711008054 | 0.2388053  | 0.335868634 |
| CHDH     | 2.350003069 | 0.79054306 | 0.336400861 |
| STAT5A   | 3.700374329 | 1.24502912 | 0.336460318 |
| TRPV4    | 7.118954316 | 2.39674261 | 0.336670598 |
| SERPINC1 | 1.544651518 | 0.52075339 | 0.337133252 |
| SLC25A18 | 11.24952206 | 3.79334377 | 0.337200438 |
| FZD5     | 12.05882389 | 4.067868   | 0.337335386 |
| SPINK1   | 2483.52729  | 837.862861 | 0.337368091 |
| TNNC1    | 0.97226667  | 0.32864216 | 0.338016481 |
| EBP      | 1517.791534 | 513.127948 | 0.338075379 |
| PSPH     | 37.1856624  | 12.5743506 | 0.338150507 |
| ACOX2    | 1.649924645 | 0.55906517 | 0.338842853 |
| C3       | 24.05503984 | 8.16217557 | 0.339312494 |
| MFAP4    | 0.533420012 | 0.18114989 | 0.339600859 |
| TNFAIP3  | 0.689415148 | 0.23434778 | 0.339922583 |
| CCDC183  | 10.11215743 | 3.4384953  | 0.340035776 |
| ANGPTL3  | 73.79107461 | 25.1215565 | 0.340441668 |
| CAMK2N2  | 8.179754855 | 2.7912527  | 0.341239163 |
| TRIM17   | 1.613444448 | 0.5508072  | 0.341385911 |
| DHCR7    | 288.3002077 | 98.4329292 | 0.341425107 |
| FAM213B  | 4.027142497 | 1.37502958 | 0.341440509 |
| NTAN1    | 19.52313904 | 6.67078926 | 0.341686306 |
| FADS1    | 26.52660151 | 9.06484178 | 0.341726466 |
| LPGAT1   | 4.409223913 | 1.5074855  | 0.341893614 |
| ADAM33   | 0.422653271 | 0.14451327 | 0.341919205 |
| OAF      | 7.370825205 | 2.52149483 | 0.342091253 |
| ZBTB47   | 1.808736669 | 0.62014327 | 0.342859896 |
| ZNF853   | 1.893912044 | 0.64997388 | 0.343191165 |
| CITED1   | 0.539571876 | 0.18534993 | 0.343512954 |
| GMDS     | 4.368052048 | 1.50266413 | 0.344012413 |
| PPFIA3   | 2.82694621  | 0.97252394 | 0.344019257 |
| LRRC45   | 38.84679565 | 13.3753279 | 0.344309684 |
| SLC43A3  | 5.750999051 | 1.98279903 | 0.34477471  |
| YDJC     | 71.13302824 | 24.5547456 | 0.345194718 |
| ARHGEF16 | 1.571649245 | 0.54339633 | 0.345749111 |
| TMEM176A | 65.53110058 | 22.7264137 | 0.346803479 |
| RBP5     | 6.931555915 | 2.40803367 | 0.347401608 |
| ISYNA1   | 10.88727145 | 3.78246148 | 0.347420517 |
| SERPINA1 | 666.876053  | 232.149263 | 0.34811456  |
| ESPNL    | 1.163036588 | 0.40583269 | 0.348942323 |
| C17orf96 | 1.227037628 | 0.42824864 | 0.349010196 |

|             |             |            |             |
|-------------|-------------|------------|-------------|
| GATSL3      | 2.158592363 | 0.75406881 | 0.349333587 |
| METTL7B     | 11.6695227  | 4.08013468 | 0.349640237 |
| AGXT2       | 1.460096461 | 0.51053142 | 0.349655953 |
| IFI6        | 5.747419557 | 2.01208652 | 0.350085199 |
| FRAT1       | 12.32897471 | 4.32198829 | 0.35055537  |
| CRB2        | 0.63582303  | 0.22366856 | 0.351778017 |
| CDK18       | 1.212285778 | 0.42832991 | 0.353324209 |
| FOXD2       | 1.372632407 | 0.48578168 | 0.353905151 |
| LSP1        | 0.431253652 | 0.15262399 | 0.353907702 |
| F2          | 85.40331686 | 30.2255948 | 0.353915936 |
| NEK8        | 6.090883992 | 2.15741746 | 0.354204326 |
| RASSF5      | 0.734480443 | 0.26047711 | 0.354641321 |
| SLC7A10     | 16.85033762 | 5.97802165 | 0.354771625 |
| ST20-MTHFS  | 11.35338676 | 4.02839691 | 0.354818963 |
| HOXC13      | 0.530745377 | 0.18855589 | 0.355266202 |
| VPS25       | 51.8757435  | 18.4351919 | 0.355372099 |
| METRN       | 8.276398685 | 2.94140546 | 0.355396782 |
| SCAMP5      | 5.428703016 | 1.92965021 | 0.355453264 |
| TLX2        | 1.736229597 | 0.61763225 | 0.355731897 |
| SERPINA4    | 6.838813605 | 2.44992697 | 0.358238595 |
| SLC52A1     | 0.401663405 | 0.14392959 | 0.358333841 |
| LOC10106017 | 0.895956332 | 0.32128419 | 0.358593578 |
| NLGN2       | 1.929394411 | 0.69370189 | 0.35954385  |
| FMO1        | 0.680029556 | 0.24479977 | 0.359984009 |
| PCSK4       | 4.620057285 | 1.6761316  | 0.36279455  |
| TMEM198     | 1.662476187 | 0.60644855 | 0.364786308 |
| OLR1        | 0.389553705 | 0.14216612 | 0.364946141 |
| ZFPM1       | 11.62543544 | 4.24484053 | 0.365133896 |
| GLTPD2      | 209.2457873 | 76.4801363 | 0.365503828 |
| CCDC69      | 23.33724568 | 8.54287573 | 0.366061867 |
| BEX1        | 0.945147474 | 0.3461484  | 0.366237452 |
| ARHGAP27    | 0.795002555 | 0.29117335 | 0.366254604 |
| MMP23B      | 2.700231816 | 0.98902202 | 0.366273006 |
| PCYT2       | 135.5312064 | 49.6838057 | 0.366585726 |
| SLC29A4     | 70.92108988 | 26.0018678 | 0.366630967 |
| LOC10798726 | 0.935934736 | 0.3434652  | 0.36697559  |
| HIST1H1B    | 0.637934584 | 0.23429109 | 0.367265071 |
| IGLV1-51    | 0.271982324 | 0.1        | 0.367670953 |
| DEF6        | 2.532621055 | 0.93171573 | 0.36788596  |
| DHRS4L2     | 19.95112795 | 7.34106087 | 0.367952173 |
| NKX3-2      | 1.942152475 | 0.71542593 | 0.368367538 |
| RRAGD       | 5.074244916 | 1.87165698 | 0.368854284 |
| AMH         | 2.89782344  | 1.07257893 | 0.370132604 |
| NOC4L       | 53.31561773 | 19.7439573 | 0.370322208 |
| MST1L       | 1.80372292  | 0.66817674 | 0.370443119 |
| C16orf59    | 32.24484848 | 11.96018   | 0.370917543 |

|             |             |            |             |
|-------------|-------------|------------|-------------|
| APOM        | 19.80474478 | 7.34924836 | 0.371085235 |
| PRCD        | 0.348669922 | 0.12996892 | 0.372756316 |
| ARPIN       | 2.373808837 | 0.88488258 | 0.372769097 |
| KCNH3       | 0.635175268 | 0.23686084 | 0.372906271 |
| HIST1H3J    | 0.8620472   | 0.32194553 | 0.37346624  |
| C14orf159   | 0.676358483 | 0.25260351 | 0.37347578  |
| RAB11FIP4   | 2.801964294 | 1.04679266 | 0.373592433 |
| CDH4        | 0.594029985 | 0.22216716 | 0.373999908 |
| RHOV        | 2.09398626  | 0.78445137 | 0.374621066 |
| JPH3        | 0.372989179 | 0.13975392 | 0.374686259 |
| ORM2        | 30.7426041  | 11.5386096 | 0.37532961  |
| RAC3        | 109.4802729 | 41.1799476 | 0.376140344 |
| FGFR4       | 172.1741083 | 64.8426731 | 0.376611058 |
| SMARCD3     | 75.35514898 | 28.4155198 | 0.377087965 |
| RHBG        | 1.646464053 | 0.62118431 | 0.377283858 |
| AMBP        | 4972.923673 | 1879.57171 | 0.377961101 |
| NOXO1       | 2.011768356 | 0.76039156 | 0.377971727 |
| ORM1        | 70.21651689 | 26.5908784 | 0.37869834  |
| DENND6B     | 4.102320843 | 1.55881457 | 0.379983582 |
| WFIKKN1     | 2.125736353 | 0.80799256 | 0.38010008  |
| STARD10     | 175.7552016 | 66.8865126 | 0.380566333 |
| RHPN1       | 4.279102813 | 1.63014368 | 0.380954548 |
| MICB        | 1.777198848 | 0.67772459 | 0.381344265 |
| MPZL2       | 2.158317631 | 0.82308782 | 0.381356204 |
| GYLTL1B     | 1.519843506 | 0.58022616 | 0.38176704  |
| NAT14       | 102.9018607 | 39.3139932 | 0.382053278 |
| ONECUT1     | 4.206279308 | 1.60873688 | 0.382460784 |
| NPDC1       | 3.795031219 | 1.45389676 | 0.38310535  |
| DNAJC17     | 60.60895618 | 23.2304189 | 0.383283599 |
| ACAD11      | 2.88338075  | 1.10589378 | 0.383540668 |
| ZNF296      | 12.34913195 | 4.74896112 | 0.384558294 |
| TLE2        | 2.823304343 | 1.08661343 | 0.384872935 |
| POLR2L      | 438.0973569 | 168.620755 | 0.384893341 |
| KCTD14      | 1.496801442 | 0.57627368 | 0.385003422 |
| NFKBIE      | 15.24803781 | 5.87514127 | 0.385304741 |
| PTRHD1      | 31.51623956 | 12.1556775 | 0.38569568  |
| TMEM189-UI  | 58.95809174 | 22.7686398 | 0.38618346  |
| GSDMD       | 54.41520427 | 21.0352653 | 0.386569628 |
| ENO3        | 14.64504672 | 5.68077402 | 0.387897296 |
| CDA         | 0.542675335 | 0.21051038 | 0.387912188 |
| DPP7        | 127.4688798 | 49.612478  | 0.389212474 |
| LOC10272375 | 0.402038608 | 0.15655115 | 0.38939333  |
| SLC22A5     | 1.304844175 | 0.50852177 | 0.38971839  |
| CELSR3      | 0.313159165 | 0.12217229 | 0.390128412 |
| SNAP25      | 1.240576196 | 0.48504042 | 0.390979954 |
| DLL3        | 0.482142847 | 0.18903899 | 0.392080885 |

|             |             |            |             |
|-------------|-------------|------------|-------------|
| CD160       | 1.661426779 | 0.65221352 | 0.3925623   |
| SAMD11      | 15.47948899 | 6.08157967 | 0.392879873 |
| HLX         | 0.845885602 | 0.33275551 | 0.39338122  |
| DAO         | 0.404394341 | 0.15910304 | 0.393435384 |
| TRIM71      | 6.363206122 | 2.5125236  | 0.394851832 |
| GAR1        | 20.08103395 | 7.929054   | 0.394852875 |
| ZMYND15     | 1.240787978 | 0.49003662 | 0.394939855 |
| SYCP2       | 0.31920478  | 0.12611767 | 0.395099555 |
| DEPDC4      | 0.628567564 | 0.24844677 | 0.395258662 |
| CNFN        | 0.675447964 | 0.26759868 | 0.396179557 |
| LRRC3       | 0.940190434 | 0.37267092 | 0.396378121 |
| RGS14       | 12.43498037 | 4.93348992 | 0.396742879 |
| PRDM16      | 2.194879953 | 0.87229308 | 0.397421773 |
| FGG         | 537.5933968 | 213.695661 | 0.397504252 |
| TSPAN18     | 0.370301693 | 0.14723507 | 0.39760841  |
| TMEM238     | 2.667784421 | 1.06154044 | 0.397910877 |
| PSMB3       | 681.4831632 | 271.189173 | 0.397939653 |
| GJB2        | 0.308088296 | 0.12272707 | 0.398350316 |
| PRR22       | 5.987800023 | 2.38642159 | 0.398547309 |
| FBXO22      | 5.060224824 | 2.01695374 | 0.398589749 |
| ASNS        | 15.65735901 | 6.24394559 | 0.39878664  |
| B4GAT1      | 102.7786814 | 40.998449  | 0.398900321 |
| SYP         | 2.545358201 | 1.01569634 | 0.399038665 |
| SNAI3       | 1.801149148 | 0.7193226  | 0.399368704 |
| RUSC1-AS1   | 85.44695237 | 34.2177518 | 0.400456083 |
| HOXA2       | 0.919479328 | 0.36850665 | 0.400777528 |
| TMSB15A     | 0.646934777 | 0.25929424 | 0.400804294 |
| C19orf35    | 2.769339652 | 1.11136345 | 0.40130991  |
| GPAM        | 0.853407473 | 0.34381024 | 0.402867621 |
| EFEMP2      | 21.70656844 | 8.76982762 | 0.404017228 |
| HMGCR       | 23.9323969  | 9.67118395 | 0.404104277 |
| UBE2V1      | 66.85029943 | 27.0214018 | 0.40420764  |
| MTFP1       | 81.8539103  | 33.0974646 | 0.404347996 |
| PARP12      | 7.280896298 | 2.95067863 | 0.405263104 |
| CCDC28B     | 4.463278926 | 1.80900806 | 0.40530921  |
| FBXO44      | 22.591869   | 9.15918799 | 0.405419666 |
| LOC388780   | 0.535315435 | 0.2170325  | 0.405429185 |
| SLC27A5     | 0.356700889 | 0.14485833 | 0.406105898 |
| LOC10798687 | 10.67444594 | 4.33925052 | 0.406508267 |
| MTMR4       | 1.87014539  | 0.76063346 | 0.406724239 |
| MYO1A       | 1.743047092 | 0.70904571 | 0.406785169 |
| FASN        | 165.8591495 | 67.4856659 | 0.406885397 |
| PTPRCAP     | 18.7747774  | 7.64443498 | 0.407165146 |
| E2F2        | 2.559481974 | 1.04270652 | 0.407389671 |
| MSI1        | 5.671013292 | 2.31095046 | 0.407502212 |
| AMN         | 31.8708512  | 12.9875075 | 0.407504255 |

|          |             |            |             |
|----------|-------------|------------|-------------|
| SLC25A10 | 54.21581624 | 22.1027402 | 0.407680668 |
| SNRNP35  | 17.24789412 | 7.03608172 | 0.407938596 |
| CRB3     | 10.7862641  | 4.40094439 | 0.40801378  |
| CLCN2    | 4.440030148 | 1.81160439 | 0.408016236 |
| SPTSSB   | 18.85345872 | 7.69304048 | 0.408043988 |
| IFI35    | 5.636730133 | 2.3066712  | 0.409221507 |
| PLXNC1   | 6.637084175 | 2.72119902 | 0.409999173 |
| SYCP3    | 1.190594495 | 0.48822009 | 0.410064122 |
| KLF14    | 0.592241299 | 0.24336481 | 0.410921719 |
| GLYCTK   | 38.71460276 | 15.9436982 | 0.411826471 |
| SERPINA6 | 27.40311603 | 11.2991749 | 0.412331754 |
| NEU1     | 89.12730171 | 36.7525193 | 0.412359834 |
| TPRN     | 61.47892901 | 25.3825564 | 0.41286595  |
| C16orf74 | 3.818303801 | 1.57675336 | 0.412946022 |
| GALK1    | 84.1390803  | 34.7877538 | 0.413455361 |
| MMP17    | 17.07153812 | 7.07439192 | 0.414396868 |
| DTX4     | 2.226674949 | 0.92382196 | 0.41488856  |
| ISOC2    | 244.080592  | 101.384177 | 0.415371727 |
| P2RY11   | 4.245583021 | 1.76352494 | 0.415378744 |
| BCAS4    | 19.12656403 | 7.94737603 | 0.415515093 |
| SLC29A2  | 84.44846155 | 35.1228479 | 0.415908677 |
| AS3MT    | 25.32395794 | 10.5498827 | 0.416596914 |
| NRARP    | 0.725396233 | 0.30238451 | 0.416854264 |
| FAM117B  | 1.099034683 | 0.45834995 | 0.417047756 |
| DCST2    | 0.393401983 | 0.16408979 | 0.417104628 |
| INS-IGF2 | 156.6062603 | 65.3416054 | 0.417234951 |
| DENND1C  | 2.404343507 | 1.00321358 | 0.41725052  |
| ABHD8    | 28.2763002  | 11.8003522 | 0.417323064 |
| DLC1     | 7.884551419 | 3.29163543 | 0.4174791   |
| AZU1     | 1.621050638 | 0.67783204 | 0.418143653 |
| NKX6-3   | 5.319620454 | 2.22534147 | 0.418327113 |
| IDUA     | 13.48846423 | 5.64652841 | 0.418619074 |
| HDHD3    | 63.62855351 | 26.6378836 | 0.418646695 |
| HUNK     | 0.461710149 | 0.1933764  | 0.418826412 |
| ADRA2C   | 2.890540562 | 1.21074781 | 0.418865532 |
| B4GALNT2 | 1.407092108 | 0.58945772 | 0.418919075 |
| ADAM32   | 0.656153905 | 0.27493764 | 0.419013955 |
| BCL2L13  | 11.76403422 | 4.93730534 | 0.419694915 |
| AIF1L    | 0.238172996 | 0.1        | 0.419862879 |
| CNNM1    | 12.53027804 | 5.26179986 | 0.419926824 |
| C12orf42 | 0.606759267 | 0.25497282 | 0.420220719 |
| PIDD1    | 9.523560135 | 4.00227912 | 0.420250312 |
| CEBPA    | 262.2526363 | 110.282752 | 0.420521042 |
| FN3K     | 30.39133187 | 12.79674   | 0.421065456 |
| WDR66    | 3.640866186 | 1.53440828 | 0.42144045  |
| THAP7    | 98.83890151 | 41.6561726 | 0.421455236 |



|             |             |            |             |
|-------------|-------------|------------|-------------|
| LOC10798464 | 8.21135915  | 3.46097675 | 0.421486466 |
| PPP1R27     | 0.707857424 | 0.29916764 | 0.422638271 |
| RTKN        | 24.08143554 | 10.1804341 | 0.422750299 |
| SULT1E1     | 0.236426427 | 0.1        | 0.422964561 |
| CFB         | 3.312278901 | 1.40239865 | 0.423393891 |
| CENPM       | 58.56704572 | 24.7996388 | 0.423440154 |
| PAR6A       | 5.111864942 | 2.16561452 | 0.423644706 |
| TRMU        | 35.01252714 | 14.8419705 | 0.423904577 |
| CIB2        | 19.01430977 | 8.06177032 | 0.423984379 |
| LAPTM5      | 0.235512858 | 0.1        | 0.424605268 |
| DGAT2       | 46.06525449 | 19.5973809 | 0.425426519 |
| TMEM184C    | 2.377252113 | 1.01150219 | 0.42549218  |
| IGF2        | 159.7654951 | 67.9811592 | 0.42550589  |
| HRASLS2     | 0.855723156 | 0.36412439 | 0.425516574 |
| EPO         | 0.328232181 | 0.13988344 | 0.426172241 |
| LINC00083   | 0.234512024 | 0.1        | 0.426417368 |
| KIF12       | 71.81365211 | 30.6242509 | 0.426440516 |
| CPLX1       | 11.90152348 | 5.08226222 | 0.427026189 |
| TSSC4       | 53.91838205 | 23.0766007 | 0.427991342 |
| ITGB4       | 0.915885703 | 0.39202224 | 0.428025285 |
| MEIS3       | 0.400814127 | 0.17168241 | 0.42833422  |
| SALL1       | 0.516057751 | 0.22117643 | 0.428588518 |
| GATM        | 14.30197225 | 6.13033818 | 0.42863586  |
| DRICH1      | 0.752183319 | 0.32298217 | 0.429392892 |
| SDC1        | 60.84663224 | 26.131184  | 0.429459825 |
| SDHAF2      | 128.3923235 | 55.1466782 | 0.429516942 |
| MVP         | 18.59312696 | 7.98874074 | 0.429660958 |
| SH2D3A      | 1.503319493 | 0.64704994 | 0.430414125 |
| NR6A1       | 7.355970372 | 3.1732972  | 0.431390699 |
| PGAP3       | 7.224651961 | 3.11882005 | 0.43169139  |
| SYCE2       | 0.617490105 | 0.26658361 | 0.431721265 |
| FAM69B      | 62.58590925 | 27.0427981 | 0.432090839 |
| H1FX        | 86.67284323 | 37.551798  | 0.433259099 |
| SPATA2L     | 36.11613134 | 15.6516489 | 0.433370031 |
| FAM229A     | 11.56450408 | 5.03265201 | 0.435180962 |
| TST         | 138.2320578 | 60.1896529 | 0.435424704 |
| SLC37A1     | 0.403332135 | 0.17572446 | 0.435681761 |
| ADCK5       | 21.96000239 | 9.57161765 | 0.435865966 |
| PAK6        | 0.459996206 | 0.20065461 | 0.436209277 |
| TNFAIP8L1   | 19.98977678 | 8.73028733 | 0.43673761  |
| RCN1        | 36.31834265 | 15.8701294 | 0.436972843 |
| PLIN4       | 0.471969781 | 0.20625247 | 0.437003541 |
| HIST1H2AB   | 2.009111957 | 0.87843787 | 0.43722694  |
| MRPL23      | 124.683459  | 54.562664  | 0.437609483 |
| WASF3       | 0.979123545 | 0.4291993  | 0.438350506 |
| KCNJ16      | 0.86268543  | 0.37867395 | 0.438947892 |

|              |             |            |             |
|--------------|-------------|------------|-------------|
| RNF166       | 13.60258077 | 5.97173686 | 0.43901499  |
| FITM1        | 1.552676217 | 0.68174954 | 0.439080301 |
| FAM151A      | 7.696109241 | 3.37980164 | 0.439157181 |
| HIST1H2AH    | 0.478647153 | 0.21028063 | 0.439322837 |
| TCAP         | 0.478253958 | 0.21016611 | 0.439444576 |
| BORCS6       | 22.46174554 | 9.88311297 | 0.439997548 |
| LRFN3        | 13.83513065 | 6.08997    | 0.440181604 |
| MGMT         | 21.58416921 | 9.50332262 | 0.440291332 |
| LSM2         | 46.02325424 | 20.2731669 | 0.440498337 |
| C10orf11     | 2.036368416 | 0.89760831 | 0.44078876  |
| PGM1         | 22.29062776 | 9.82560438 | 0.440795319 |
| DERL1        | 11.64212507 | 5.13450866 | 0.441028474 |
| SDSL         | 9.3456458   | 4.12470106 | 0.44135003  |
| CERS1        | 5.474850068 | 2.41709745 | 0.441491076 |
| ST6GALNAC    | 0.262036727 | 0.11573101 | 0.441659518 |
| SKP2         | 18.2723717  | 8.0731022  | 0.441820161 |
| HNF1B        | 9.133709329 | 4.03775989 | 0.4420723   |
| BEX2         | 6.087045479 | 2.69113731 | 0.442108954 |
| FAM169A      | 1.635355436 | 0.72340873 | 0.442355658 |
| NAT8         | 9.039554629 | 4.00545525 | 0.443103163 |
| NGEF         | 1.015222516 | 0.44985697 | 0.443111697 |
| ADAMTSL5     | 8.897284122 | 3.94330103 | 0.443202776 |
| CRYBB3       | 0.540506176 | 0.23996037 | 0.443954912 |
| CXCL1        | 17.0600253  | 7.57613824 | 0.444087163 |
| EPPK1        | 0.756707136 | 0.33607607 | 0.44412964  |
| CCND1        | 200.6163123 | 89.1225628 | 0.444243849 |
| CRIP1        | 636.1612171 | 283.006564 | 0.444866107 |
| SLC25A45     | 5.954846696 | 2.65078149 | 0.44514689  |
| ZNF709       | 0.248707312 | 0.11082772 | 0.445615028 |
| DLK1         | 0.605482632 | 0.26987078 | 0.445711836 |
| MUL1         | 8.217828494 | 3.66335274 | 0.445781114 |
| SYT7         | 1.190878504 | 0.53099047 | 0.445881311 |
| TCEA3        | 16.67536217 | 7.44797066 | 0.446645211 |
| PRICKLE4     | 0.80078095  | 0.35781279 | 0.446829793 |
| RGN          | 7.577763999 | 3.39033997 | 0.447406382 |
| DGAT1        | 41.08439068 | 18.389898  | 0.447612772 |
| HEXDC        | 27.58678642 | 12.3597813 | 0.44803266  |
| LOC10192983  | 0.802471636 | 0.35967725 | 0.448211797 |
| GYG2         | 13.6565484  | 6.12852723 | 0.448761067 |
| PRR5-ARHGAP1 | 0.605680557 | 0.27182548 | 0.448793474 |
| DNAJC4       | 13.59105783 | 6.11255562 | 0.449748334 |
| TGM1         | 0.646540874 | 0.29101542 | 0.450111396 |
| IGSF23       | 1.268647902 | 0.57127821 | 0.450304777 |
| SLC31A1      | 19.29892167 | 8.69288722 | 0.450433831 |
| RECQL4       | 49.65053078 | 22.3680295 | 0.450509373 |
| C19orf66     | 2.420790139 | 1.0908489  | 0.450616881 |

|           |             |            |             |
|-----------|-------------|------------|-------------|
| NPPB      | 26.19302016 | 11.8033339 | 0.450628977 |
| VMO1      | 1.685702693 | 0.75976344 | 0.450710227 |
| POMK      | 0.511464795 | 0.23073316 | 0.451122277 |
| PIM2      | 14.28504229 | 6.45472564 | 0.45185205  |
| RSC1A1    | 1.383338331 | 0.6263307  | 0.452767544 |
| ABCB9     | 1.578030568 | 0.71553903 | 0.453438001 |
| CMTM4     | 2.194213732 | 0.99530151 | 0.453602809 |
| CXCL3     | 0.623811564 | 0.28307155 | 0.453777332 |
| CAPN12    | 99.42915128 | 45.136594  | 0.45395735  |
| SAT2      | 120.3406902 | 54.6384803 | 0.454031635 |
| BIK       | 4.877788056 | 2.21511991 | 0.454123853 |
| CCDC39    | 0.462305263 | 0.21010894 | 0.454480955 |
| ATP6V0E2  | 16.95660009 | 7.71030774 | 0.454708355 |
| WDR18     | 173.1698785 | 78.7679682 | 0.454859522 |
| SCUBE3    | 0.474751606 | 0.21596768 | 0.454906685 |
| STAP2     | 9.70622087  | 4.41563905 | 0.454928763 |
| JAML      | 7.746963027 | 3.52457438 | 0.454962076 |
| SHF       | 11.31916369 | 5.14988217 | 0.4549702   |
| FAM124A   | 0.432757517 | 0.19691531 | 0.455024591 |
| MCRIP2    | 144.135574  | 65.619295  | 0.455260927 |
| TMEM245   | 11.95802745 | 5.45291978 | 0.456004956 |
| MESP2     | 0.363301315 | 0.16573108 | 0.456180786 |
| ENPP2     | 0.849052112 | 0.38733363 | 0.456195356 |
| LRRC75B   | 19.74048617 | 9.01716031 | 0.456785118 |
| C7orf50   | 188.8950104 | 86.3054476 | 0.456896386 |
| GSTA1     | 0.95206681  | 0.43502093 | 0.456922694 |
| SLC2A4    | 0.697650863 | 0.31898531 | 0.457227719 |
| MAPK11    | 4.370410942 | 1.99836007 | 0.457247636 |
| TONSL     | 26.17225362 | 11.9778462 | 0.457654369 |
| FZD9      | 1.603486803 | 0.73418423 | 0.457867334 |
| FGF12     | 0.83748494  | 0.38352516 | 0.45794873  |
| WNT10B    | 1.086122719 | 0.49767166 | 0.458209418 |
| PLCD1     | 3.792079436 | 1.73912827 | 0.458621266 |
| CARMIL2   | 4.203641845 | 1.92792512 | 0.458632107 |
| SLC6A12   | 0.693967788 | 0.31851691 | 0.458979392 |
| SLC44A1   | 4.300808426 | 1.97555678 | 0.459345449 |
| PKLR      | 0.937926365 | 0.43120428 | 0.45974215  |
| RHOD      | 368.4844674 | 169.441302 | 0.459832957 |
| USP2      | 1.823877467 | 0.83890678 | 0.459957861 |
| UPB1      | 1.389945177 | 0.63956242 | 0.460134996 |
| TREX2     | 0.583743109 | 0.26906767 | 0.460935065 |
| ELMO3     | 4.522725367 | 2.08496345 | 0.460997139 |
| ECT2L     | 0.370844346 | 0.17099484 | 0.461095998 |
| BAHCC1    | 1.003686335 | 0.46291869 | 0.461218487 |
| SLC25A40  | 1.6071169   | 0.74153701 | 0.461408256 |
| METTTL21B | 1.147457131 | 0.52958963 | 0.461533263 |

|             |             |            |             |
|-------------|-------------|------------|-------------|
| LINGO3      | 0.755551402 | 0.34903747 | 0.461963895 |
| SCT         | 0.415102562 | 0.19177332 | 0.461990218 |
| TMEM92      | 0.714338015 | 0.3300469  | 0.462031829 |
| CLDN22      | 1.06400284  | 0.491765   | 0.462183916 |
| COL2A1      | 1.882821398 | 0.87066896 | 0.462427804 |
| EMX1        | 0.356102452 | 0.16477518 | 0.462718455 |
| YY2         | 0.29933887  | 0.13870484 | 0.463370622 |
| KRT17       | 0.215711106 | 0.1        | 0.463582993 |
| LPAR2       | 1.175009734 | 0.54492528 | 0.463762355 |
| HMBS        | 29.27142403 | 13.5828255 | 0.464030226 |
| TLN2        | 1.919814785 | 0.89099332 | 0.464103793 |
| DHRS4       | 43.84467712 | 20.3542806 | 0.46423607  |
| TNK2        | 12.83587889 | 5.96252346 | 0.464520078 |
| CKB         | 782.3515465 | 363.477607 | 0.464596266 |
| FBLN1       | 85.6333982  | 39.7892374 | 0.464646251 |
| WDR86       | 11.78282717 | 5.47859753 | 0.4649646   |
| NRG4        | 0.819009282 | 0.3808568  | 0.46502135  |
| TAP2        | 0.871164964 | 0.40520702 | 0.46513237  |
| SELO        | 76.36089968 | 35.5244235 | 0.465217456 |
| PLEKHA6     | 0.612865113 | 0.28558275 | 0.465979774 |
| COL6A1      | 33.23531529 | 15.4924607 | 0.466144538 |
| THEM5       | 1.901162171 | 0.88688017 | 0.466493697 |
| ASGR2       | 163.772066  | 76.4130971 | 0.466581994 |
| HYAL1       | 0.58745063  | 0.27423534 | 0.466822784 |
| IFITM3      | 30.45488012 | 14.2347404 | 0.46740425  |
| GSAP        | 0.664366961 | 0.31133458 | 0.468618404 |
| MRPS17      | 209.3725523 | 98.133642  | 0.468703471 |
| TLCD1       | 22.42089538 | 10.5119528 | 0.468846252 |
| FADS2       | 187.978448  | 88.1818383 | 0.469106109 |
| SLC19A1     | 77.46080409 | 36.3652039 | 0.469465871 |
| TCEAL3      | 1.71892694  | 0.80726641 | 0.469633928 |
| GPAT2       | 1.193869554 | 0.56081547 | 0.469746019 |
| LOC10013035 | 0.995501886 | 0.46820811 | 0.470323679 |
| TP53I13     | 227.8364485 | 107.265394 | 0.470799974 |
| TAZ         | 20.00201871 | 9.42108307 | 0.471006612 |
| FAM107B     | 13.53679955 | 6.37620946 | 0.47102784  |
| PCYT1B      | 0.942431346 | 0.44413756 | 0.471267812 |
| SLC17A9     | 111.7062246 | 52.7252579 | 0.471999283 |
| TMEM176B    | 42.17228839 | 19.9084054 | 0.47207316  |
| ZDHHC19     | 1.097203683 | 0.51822587 | 0.4723151   |
| SYNGR3      | 2.675206797 | 1.26383429 | 0.472424896 |
| CACNB1      | 1.764831018 | 0.83438206 | 0.472782973 |
| NOTCH1      | 2.428968881 | 1.14881544 | 0.472964247 |
| ACTR5       | 8.034635868 | 3.80180786 | 0.473177369 |
| LGALS3BP    | 1.550587191 | 0.73372322 | 0.47319056  |
| GUCA1B      | 0.902331633 | 0.42714966 | 0.473384337 |

|           |             |            |             |
|-----------|-------------|------------|-------------|
| PROM1     | 24.01842728 | 11.3713192 | 0.473441458 |
| SCARF2    | 12.16589198 | 5.76397147 | 0.473781247 |
| TMEM185A  | 2.53694108  | 1.2019908  | 0.473795315 |
| PKDCC     | 29.03483974 | 13.7589235 | 0.473876337 |
| ZNRF1     | 31.20834682 | 14.7895554 | 0.473897433 |
| LGALS4    | 1.938597252 | 0.91898426 | 0.474045996 |
| FBXO27    | 0.305621542 | 0.14491531 | 0.474165888 |
| CCS       | 398.9068944 | 189.213268 | 0.474329399 |
| C14orf1   | 83.7927409  | 39.7459564 | 0.474336512 |
| CBLC      | 0.625950893 | 0.29694919 | 0.474396937 |
| ZNF684    | 1.042454234 | 0.4945778  | 0.474435984 |
| CYSRT1    | 5.202053867 | 2.47209629 | 0.475215435 |
| APOH      | 14.70875996 | 6.99010575 | 0.475234199 |
| PDK2      | 1.203813822 | 0.57238573 | 0.475476954 |
| LIN7B     | 31.19211585 | 14.831605  | 0.475492111 |
| FBXO6     | 8.973867079 | 4.267088   | 0.475501583 |
| WNK4      | 1.323047741 | 0.62922851 | 0.475590179 |
| RNF207    | 3.261966679 | 1.55180299 | 0.475726192 |
| IL17RB    | 4.317730711 | 2.05428877 | 0.475779733 |
| TTC38     | 17.94467129 | 8.5393921  | 0.47587342  |
| PRR36     | 0.382183481 | 0.18218567 | 0.476696878 |
| UNC119    | 41.98274798 | 20.0199807 | 0.476862084 |
| FAHD2B    | 3.674535631 | 1.7534802  | 0.477197766 |
| PROC      | 30.32996292 | 14.4799922 | 0.477415428 |
| HMOX1     | 37.67132332 | 18.0151916 | 0.478220303 |
| DOK3      | 2.917196472 | 1.39553549 | 0.478382413 |
| BOLA2B    | 1.950543331 | 0.93453264 | 0.479114011 |
| SEMA7A    | 0.961640595 | 0.46074351 | 0.479122361 |
| TMEM54    | 84.44609355 | 40.4613365 | 0.479138049 |
| GLYATL1   | 0.647526698 | 0.31049596 | 0.479510662 |
| FRG1      | 10.81006317 | 5.18580832 | 0.479720446 |
| NDRG1     | 12.31875565 | 5.9108504  | 0.479825282 |
| FCGRT     | 68.57086006 | 32.9133505 | 0.479990341 |
| LSR       | 7.9618873   | 3.82572297 | 0.480504537 |
| TM4SF5    | 219.0152795 | 105.365816 | 0.481088884 |
| TRPV3     | 1.073262965 | 0.51651547 | 0.481257146 |
| AGMAT     | 20.77288602 | 10.0228087 | 0.482494763 |
| PTGES2    | 167.4359972 | 80.8166654 | 0.482671986 |
| LGALS2    | 48.27687413 | 23.3071791 | 0.482781446 |
| PPP2R3B   | 1.226108496 | 0.59196705 | 0.482801525 |
| LOC730098 | 4.934589262 | 2.38522763 | 0.483369032 |
| PYGL      | 29.30297321 | 14.172017  | 0.483637512 |
| PAQR6     | 0.727973477 | 0.35210083 | 0.483672609 |
| HMHA1     | 26.58568612 | 12.8672178 | 0.483990436 |
| RPL24     | 2814.029794 | 1362.46878 | 0.48416999  |
| APOC1     | 1519.414086 | 735.718039 | 0.484211674 |

|             |             |            |             |
|-------------|-------------|------------|-------------|
| CFAP45      | 1.486685331 | 0.72058195 | 0.484690293 |
| SDC4        | 96.89175704 | 46.9736551 | 0.484805483 |
| CDC25C      | 17.08917645 | 8.28752874 | 0.48495776  |
| ARHGAP1     | 16.60316853 | 8.05469694 | 0.485130108 |
| HOOK2       | 5.709696743 | 2.77217966 | 0.485521349 |
| CD3D        | 1.13587647  | 0.55254706 | 0.48644996  |
| CXADR       | 12.76857564 | 6.21666562 | 0.486872286 |
| NUDT18      | 17.09873287 | 8.32786591 | 0.487045793 |
| CCR6        | 3.084009486 | 1.50274166 | 0.487268819 |
| TEF         | 3.027768237 | 1.47559777 | 0.487354929 |
| THAP3       | 14.06374535 | 6.85634752 | 0.487519316 |
| C2          | 9.006206146 | 4.3914863  | 0.487606682 |
| PRR7        | 2.46465994  | 1.2023479  | 0.487835209 |
| MRPS33      | 65.77396315 | 32.0976426 | 0.487999218 |
| CCR10       | 1.515259684 | 0.7396099  | 0.488107686 |
| LOXL4       | 31.36894433 | 15.3231733 | 0.488482277 |
| DUOXA1      | 0.33281029  | 0.16258995 | 0.488536421 |
| EMILIN1     | 0.562491825 | 0.2751104  | 0.489092262 |
| JAM3        | 2.185449779 | 1.06892413 | 0.489109446 |
| MMAB        | 59.81852184 | 29.2584218 | 0.489119772 |
| LOC10050650 | 0.415990945 | 0.20353607 | 0.489280054 |
| IFT20       | 70.01150865 | 34.2581132 | 0.489321168 |
| KCTD17      | 13.77388058 | 6.74301629 | 0.489550948 |
| SCNN1D      | 0.524201496 | 0.25681128 | 0.489909484 |
| ATP7B       | 2.096669571 | 1.02723973 | 0.489938778 |
| TMEM191C    | 6.742307356 | 3.30623832 | 0.490371937 |
| NUTM2B      | 0.597923307 | 0.29335959 | 0.490630799 |
| AEBP1       | 2.239551022 | 1.09962397 | 0.491001971 |
| AK4         | 11.42126852 | 5.61067463 | 0.49124794  |
| AP1M2       | 216.9205723 | 106.703203 | 0.491899877 |
| CA11        | 0.635960965 | 0.31286108 | 0.491950129 |
| FZD4        | 10.37977006 | 5.1074921  | 0.492062163 |
| SLC12A2     | 5.166451258 | 2.54316328 | 0.492245674 |
| CIAPIN1     | 27.56128935 | 13.5921926 | 0.493162438 |
| LOC10272518 | 0.452553776 | 0.22321714 | 0.49323894  |
| TOMM40L     | 8.588104574 | 4.23645161 | 0.49329297  |
| TSPYL2      | 13.3838698  | 6.60266006 | 0.493329669 |
| DYRK1B      | 3.940862605 | 1.94489003 | 0.493518861 |
| THEM6       | 9.673212281 | 4.7743169  | 0.493560645 |
| PMP22       | 0.99246248  | 0.48989328 | 0.493613905 |
| LPIN3       | 2.34897759  | 1.15979566 | 0.493744882 |
| STAR        | 1.23719112  | 0.61100329 | 0.493863304 |
| NAT6        | 11.66767053 | 5.76291011 | 0.493921224 |
| AMOT        | 0.629128902 | 0.31076575 | 0.493961972 |
| TMPRSS9     | 4.854181978 | 2.39823518 | 0.494055473 |
| HPX         | 33.80270731 | 16.7031117 | 0.494135322 |

|             |             |            |             |
|-------------|-------------|------------|-------------|
| TMEM59L     | 1.26244754  | 0.62422464 | 0.494455905 |
| PAGE1       | 0.966045082 | 0.47835222 | 0.495165522 |
| MTHFS       | 18.27442294 | 9.04923778 | 0.495185966 |
| FAM212B     | 2.088354557 | 1.03413643 | 0.495191981 |
| GSTO2       | 1.301578629 | 0.64462313 | 0.495262536 |
| TEN1        | 36.2701079  | 17.9767438 | 0.495635244 |
| SEPN1       | 16.62280871 | 8.24286986 | 0.495877081 |
| EMID1       | 7.732667409 | 3.83584117 | 0.49605666  |
| EPHX1       | 65.85180696 | 32.7056304 | 0.496655019 |
| NTHL1       | 68.35916047 | 33.951676  | 0.496666076 |
| CCDC24      | 16.83711069 | 8.36446662 | 0.496787529 |
| ENTPD2      | 0.302269549 | 0.15049498 | 0.497883379 |
| PAH         | 4.968555931 | 2.47426248 | 0.497984225 |
| RTN4RL2     | 4.612211909 | 2.29826047 | 0.498298975 |
| BRAT1       | 66.89140581 | 33.3346848 | 0.498340324 |
| C1orf229    | 0.341978672 | 0.17047606 | 0.498499098 |
| UBE2J2      | 76.16113768 | 37.9864706 | 0.498764485 |
| CCDC106     | 66.04913744 | 32.9703218 | 0.499178688 |
| PEX11G      | 1.467880615 | 0.73274331 | 0.49918454  |
| LOC10050555 | 0.434304847 | 0.21683916 | 0.499278712 |
| IL17RC      | 27.87616078 | 13.9220064 | 0.49942338  |
| HIST2H3D    | 0.897064686 | 0.4482165  | 0.49964792  |

**Table S3. RIP-seq of TRIM71 in HuH-7 cells.**

| GeneID     | GeneType    | Input    | TRIM71-RIP  | Fold change | AccID          |
|------------|-------------|----------|-------------|-------------|----------------|
| HIST1H4C   | mRNA        | 32.0238  | 1552.149662 | 47.03122397 | NM_003542.3    |
| MIR1244-1  | Precursor_m | 1.933325 | 43.99199914 | 15.33822356 | NR_036052.1    |
| HIST1H4D   | mRNA        | 35.37406 | 509.0522516 | 14.02241809 | NM_003539.3    |
| MIR1469    | Precursor_m | 0        | 12.23999976 | 13.23999976 | NR_031715.1    |
| HIST1H4K   | mRNA        | 0.928433 | 23.56372835 | 12.73766198 | NM_003541.2    |
| MIR6741    | miRNA       | 0        | 11.41428549 | 12.41428549 | NR_106799.1    |
| MIR15A     | miRNA       | 0        | 10.3966263  | 11.3966263  | NR_029485.1    |
| MIR4635    | Precursor_m | 0        | 9.102531468 | 10.10253147 | NR_039778.1    |
| HIST4H4    | mRNA        | 2.79206  | 37.00223229 | 10.02152825 | NM_175054.2    |
| MIR6837    | miRNA       | 0        | 8.988749825 | 9.988749825 | NR_106896.1    |
| SNORD37    | snoRNA      | 0        | 8.716363466 | 9.716363466 | NR_002602.1    |
| CDKN1A     | mRNA        | 0.497762 | 13.38005166 | 9.601024264 | NM_078467.2    |
| MIR1244-2  | Precursor_m | 0        | 8.459999835 | 9.459999835 | NR_036262.1    |
| H2AFZ      | mRNA        | 56.91775 | 534.7309505 | 9.249857787 | NM_002106.3    |
| SNORD36B   | snoRNA      | 0        | 8.102535053 | 9.102535053 | NR_000017.1    |
| MIR6859-3  | miRNA       | 2.416657 | 29.60999942 | 8.95905057  | NR_107063.1    |
| RPL27      | mRNA        | 46.14594 | 406.1825375 | 8.636641277 | NM_000988.3    |
| RNA5SP398  | ncRNA       | 0        | 7.413401917 | 8.413401917 | RNA5SP398      |
| MIR16-2    | Precursor_m | 0        | 7.102222084 | 8.102222084 | NR_029525.1    |
| MIR6819    | Precursor_m | 0        | 7.073114616 | 8.073114616 | NR_106877.1    |
| RNR1       | rRNA        | 1.205795 | 16.73377326 | 8.039628454 | RNR1           |
| RPS21      | mRNA        | 46.06294 | 364.9977201 | 7.776771316 | NM_001024.3    |
| MIR6835    | miRNA       | 0        | 6.741562368 | 7.741562368 | NR_106893.1    |
| SNORA21    | snoRNA      | 1.235584 | 16.22030044 | 7.702820251 | NR_002576.1    |
| HIST2H4B   | mRNA        | 2.074907 | 22.51727229 | 7.648124245 | NM_001034077.4 |
| SNORD56    | snoRNA      | 2.314544 | 24.30760516 | 7.635319477 | NR_002739.1    |
| RPL27AP6   | ncRNA       | 1.62384  | 18.75913007 | 7.530614268 | NM_001089587.2 |
| UQCRQ      | mRNA        | 8.087033 | 67.41845925 | 7.529241075 | NM_014402.4    |
| MIR6728    | miRNA       | 0        | 6.463820099 | 7.463820099 | NR_106786.1    |
| C8orf59    | mRNA        | 14.2898  | 108.4767087 | 7.160115879 | NR_120681.1    |
| HIST1H1E   | mRNA        | 72.01329 | 517.7519899 | 7.10489829  | NM_005321.2    |
| MIR574     | Precursor_m | 0        | 5.992499883 | 6.992499883 | NR_030300.1    |
| MIR1228    | Precursor_m | 0        | 5.910410844 | 6.910410844 | NR_031597.1    |
| MIR579     | Precursor_m | 0        | 5.870203967 | 6.870203967 | NR_030305.1    |
| MIR885     | miRNA       | 0        | 5.830540427 | 6.830540427 | NR_030614.1    |
| MIR4792    | Precursor_m | 0        | 5.830540427 | 6.830540427 | NR_039955.1    |
| TRI-TAT2-1 | tRNA        | 0        | 5.830540427 | 6.830540427 | TRNAI13        |
| PSME2      | mRNA        | 13.77033 | 98.98147681 | 6.769076821 | NM_002818.2    |
| MIR3605    | miRNA       | 0        | 5.752799888 | 6.752799888 | NR_037400.1    |
| SNORD23    | snoRNA      | 1.493933 | 15.68945424 | 6.692021406 | NR_003048.1    |
| MIR5187    | miRNA       | 0        | 5.677105152 | 6.677105152 | NR_049819.1    |
| ALG5       | mRNA        | 12.86865 | 89.42292699 | 6.519952002 | NM_013338.4    |
| MIR7113    | Precursor_m | 13.9265  | 95.06745577 | 6.436035442 | NR_106963.1    |
| MIR320E    | miRNA       | 0        | 5.427169705 | 6.427169705 | NR_036157.1    |



|            |             |          |             |             |                |
|------------|-------------|----------|-------------|-------------|----------------|
| SNRPGP10   | ncRNA       | 0.849264 | 10.77720909 | 6.36859146  | SNRPGP10       |
| MIR107     | miRNA       | 0        | 5.326666563 | 6.326666563 | NR_029524.1    |
| MIR5188    | miRNA       | 0        | 5.090973352 | 6.090973352 | NR_049820.1    |
| MIR1306    | Precursor_m | 0        | 5.075999901 | 6.075999901 | NR_031706.1    |
| MIR6515    | miRNA       | 0        | 5.046315691 | 6.046315691 | NR_106770.1    |
| RNU7-171P  | ncRNA       | 0        | 5.046315691 | 6.046315691 | RNU7-171P      |
| RPL12P16   | ncRNA       | 1.831733 | 15.80187867 | 5.933425409 | RPL12P16       |
| HIST2H3A   | mRNA        | 1.620638 | 14.46710031 | 5.902037146 | NM_001005464.2 |
| CRELD2     | mRNA        | 1.832706 | 15.63841977 | 5.873683672 | NR_104295.1    |
| SNORD78    | snoRNA      | 6.086394 | 39.94999922 | 5.778679064 | NR_003944.1    |
| MIR6820    | Precursor_m | 0        | 4.639354748 | 5.639354748 | NR_106878.1    |
| RPS16      | mRNA        | 75.95017 | 428.8882447 | 5.58657985  | NM_001020.4    |
| MIR6790    | miRNA       | 0        | 4.565714197 | 5.565714197 | NR_106848.1    |
| RPS15A     | mRNA        | 64.76462 | 363.1256283 | 5.536801461 | NM_001030009.1 |
| HIST1H2AJ  | mRNA        | 5.240677 | 33.41603579 | 5.514792238 | NM_021066.2    |
| MIR193A    | Precursor_m | 1.867416 | 14.70886335 | 5.47840311  | NR_029710.1    |
| MIR4449    | miRNA       | 0        | 4.358181733 | 5.358181733 | NR_039651.1    |
| RPL36AP37  | ncRNA       | 7.900608 | 46.67235486 | 5.356078362 | RPL36AP37      |
| CEBPA      | mRNA        | 41.28616 | 223.136917  | 5.30047958  | NM_004364.4    |
| MIR6856    | miRNA       | 0        | 4.293134245 | 5.293134245 | NR_106915.1    |
| MIR4728    | miRNA       | 0        | 4.293134245 | 5.293134245 | NR_039881.2    |
| MIR3124    | Precursor_m | 0        | 4.293134245 | 5.293134245 | NR_036070.1    |
| HIST1H4L   | mRNA        | 12.18951 | 68.74911954 | 5.288226843 | NM_003546.2    |
| MIR1282    | miRNA       | 0        | 4.271881105 | 5.271881105 | NR_031695.1    |
| HCFC1R1    | mRNA        | 1.308121 | 11.16214904 | 5.269286644 | NM_017885.3    |
| HIST2H3D   | mRNA        | 9.349341 | 53.18507555 | 5.235606288 | NM_001123375.2 |
| MRPL2      | mRNA        | 7.306425 | 42.37650256 | 5.222042103 | NM_015950.4    |
| SNORD9     | snoRNA      | 0        | 4.188931957 | 5.188931957 | NR_003029.2    |
| GIPC1      | mRNA        | 8.782423 | 49.66445946 | 5.179131824 | NM_202494.2    |
| HIST1H4A   | mRNA        | 6.626317 | 38.27467667 | 5.149888088 | NM_003538.3    |
| MAGED2     | mRNA        | 1.944765 | 14.13979035 | 5.141255716 | NM_201222.2    |
| HIST3H2BB  | mRNA        | 2.544975 | 17.18203506 | 5.128960504 | NM_175055.2    |
| RPL21P16   | ncRNA       | 1.129434 | 9.88453589  | 5.111468955 | NM_001139505.1 |
| MIR1269A   | Precursor_m | 0        | 4.109142777 | 5.109142777 | NR_031673.1    |
| RUSC1      | mRNA        | 8.050763 | 45.0012842  | 5.082586589 | NR_103478.1    |
| SNORD38A   | snoRNA      | 0        | 4.051267527 | 5.051267527 | NR_001456.1    |
| RNU6-45P   | ncRNA       | 0        | 4.03233637  | 5.03233637  | NR_046496.1    |
| MIR19A     | miRNA       | 2.004057 | 14.03121924 | 5.003640311 | NR_029489.1    |
| TRP-AGG2-3 | tRNA        | 0        | 3.994999922 | 4.994999922 | TRP1           |
| EFNA4      | mRNA        | 2.876148 | 18.19202828 | 4.951314357 | NM_182690.2    |
| TRV-CAC1-6 | tRNA        | 0        | 3.940273896 | 4.940273896 | TRV-CAC1-6     |
| HIST1H1A   | mRNA        | 92.16095 | 457.2407849 | 4.918807641 | NM_005325.3    |
| MANF       | mRNA        | 15.69948 | 81.09476477 | 4.916005856 | NM_006010.5    |
| MIR6853    | miRNA       | 0        | 3.887026951 | 4.887026951 | NR_106912.1    |
| TRI-AAT8-1 | tRNA        | 0        | 3.887026951 | 4.887026951 | TRNAI5         |
| TRNAI-AAU  | tRNA        | 0        | 3.887026951 | 4.887026951 | TRNAI-AAU      |

|             |             |          |             |             |                |
|-------------|-------------|----------|-------------|-------------|----------------|
| HIST1H2AK   | mRNA        | 4.286939 | 24.69952126 | 4.860945574 | NM_003510.2    |
| HIST1H2BI   | mRNA        | 8.649087 | 45.74594876 | 4.844598201 | NM_003525.2    |
| MIR4512     | Precursor_m | 0        | 3.735584343 | 4.735584343 | NR_039737.1    |
| TK1         | mRNA        | 5.945606 | 31.13540864 | 4.626724985 | NM_003258.4    |
| MIR3190     | miRNA       | 0        | 3.59549993  | 4.59549993  | NR_036158.1    |
| MIR4435-1   | Precursor_m | 0        | 3.59549993  | 4.59549993  | NR_039634.1    |
| MIR1248     | Precursor_m | 9.301848 | 46.1309425  | 4.574998774 | NR_031650.1    |
| H2AFX       | mRNA        | 30.82526 | 143.6395455 | 4.544803449 | NM_002105.2    |
| RPL27A      | mRNA        | 8.521451 | 42.03470301 | 4.519763013 | NM_032650.1    |
| MIR3177     | miRNA       | 0        | 3.50780481  | 4.50780481  | NR_036138.1    |
| RPL36       | mRNA        | 36.41636 | 166.5848012 | 4.478917803 | NM_033643.2    |
| MIRLET7F2   | miRNA       | 0        | 3.465542101 | 4.465542101 | NR_029484.1    |
| RPL12       | mRNA        | 171.0553 | 766.6041669 | 4.461379258 | NM_000976.3    |
| ZMAT5       | mRNA        | 4.136156 | 21.85841196 | 4.450490411 | NM_019103.2    |
| MIRLET7A1   | miRNA       | 2.054158 | 12.58424975 | 4.44778862  | NR_029476.1    |
| SPON2       | mRNA        | 4.106415 | 21.5630167  | 4.418562948 | NM_012445.3    |
| MRPL54      | mRNA        | 2.637763 | 15.00529666 | 4.399763148 | NM_172251.2    |
| ATP5H       | mRNA        | 66.5785  | 295.5015376 | 4.387512773 | NM_006356.2    |
| DAZAP2      | mRNA        | 40.89349 | 182.0657582 | 4.369790155 | NM_014764.3    |
| HMG2        | mRNA        | 46.73757 | 207.0745008 | 4.358715401 | NM_005517.3    |
| HIST1H2AI   | mRNA        | 10.86207 | 50.29100115 | 4.323949274 | NM_003509.2    |
| HIST2H2AAA4 | mRNA        | 1.230956 | 8.618426798 | 4.311347253 | NM_001040874.1 |
| GTF2A2      | mRNA        | 12.02434 | 54.84931157 | 4.288072218 | NM_004492.2    |
| RPS7P10     | ncRNA       | 0.248237 | 4.345015021 | 4.282052686 | RPS7P10        |
| SNORD24     | snoRNA      | 13.14661 | 59.44559884 | 4.272796824 | NR_002447.1    |
| MIR3618     | Precursor_m | 0        | 3.2686363   | 4.2686363   | NR_037412.1    |
| FAM222A     | mRNA        | 3.140114 | 16.67212706 | 4.268511844 | NM_032829.2    |
| RNU6-758P   | ncRNA       | 0        | 3.231910049 | 4.231910049 | RNU6-758P      |
| MIR2276     | Precursor_m | 0        | 3.231910049 | 4.231910049 | NR_031753.1    |
| RPS27P3     | ncRNA       | 4.749499 | 23.27722498 | 4.222494317 | RPS27P3        |
| MIR4691     | miRNA       | 9.666626 | 43.99199914 | 4.218015814 | NR_039840.1    |
| TAGLN       | mRNA        | 5.171676 | 24.75514403 | 4.173119776 | NM_003186.3    |
| HMG2P6      | ncRNA       | 1.37632  | 8.793014904 | 4.12108363  | HMG2P6         |
| BIN1        | mRNA        | 26.71607 | 113.1636294 | 4.119041284 | NM_139351.2    |
| IGFBP6      | mRNA        | 0.51035  | 5.210869464 | 4.112205847 | NM_002178.2    |
| MGST3       | mRNA        | 3.786467 | 18.6520997  | 4.105763475 | NM_004528.3    |
| RPS27P4     | ncRNA       | 0.476327 | 5.002434685 | 4.065790729 | RPS27P4        |
| HIST1H2AM   | mRNA        | 21.93352 | 91.84398178 | 4.048397206 | NM_003514.2    |
| MIR613      | miRNA       | 0        | 3.027789415 | 4.027789415 | NR_030344.1    |
| HIST1H2BB   | mRNA        | 17.1577  | 72.07684314 | 4.024564674 | NM_021062.2    |
| LOC10798718 | lncRNA      | 0        | 3.011937114 | 4.011937114 |                |
| ASNA1       | mRNA        | 11.0411  | 47.30329595 | 4.01153518  | NM_004317.2    |
| BAD         | mRNA        | 0.805552 | 6.227499878 | 4.002930435 | NM_032989.2    |
| BTF3        | mRNA        | 38.41884 | 156.7165862 | 4.001045635 | NM_001207.4    |
| MIR578      | Precursor_m | 0        | 2.996249942 | 3.996249942 | NR_030304.1    |
| POLR2I      | mRNA        | 2.449913 | 12.69970159 | 3.97102772  | NM_006233.4    |

|             |             |          |             |             |                |
|-------------|-------------|----------|-------------|-------------|----------------|
| CRIP1       | mRNA        | 1.369439 | 8.389499836 | 3.962752713 | NM_001311.4    |
| EEF1G       | mRNA        | 105.2456 | 418.8359996 | 3.951563038 | NM_001404.4    |
| MIR567      | miRNA       | 0        | 2.935101984 | 3.935101984 | NR_030292.1    |
| RPL18       | mRNA        | 72.81029 | 288.6128467 | 3.92374597  | NR_073022.1    |
| NPW         | mRNA        | 1.455703 | 8.634862036 | 3.923464512 | NM_001099456.2 |
| MAD2L2      | mRNA        | 3.138297 | 15.2309372  | 3.922129482 | NM_006341.3    |
| BCYRN1P1    | ncRNA       | 0        | 2.920202989 | 3.920202989 | BCYRN1P1       |
| RPL21P75    | ncRNA       | 3.761135 | 17.47109121 | 3.879556613 | RPL21P75       |
| RPL19       | mRNA        | 172.0856 | 670.0069434 | 3.876734109 | NM_000981.3    |
| MIR593      | Precursor_m | 0        | 2.876399944 | 3.876399944 | NR_030324.1    |
| RPS25       | mRNA        | 181.0331 | 703.3148643 | 3.869157735 | NM_001028.2    |
| HIST1H4E    | mRNA        | 24.41015 | 97.27877794 | 3.867696922 | NM_003545.3    |
| RNU6-1053P  | ncRNA       | 0        | 2.847920736 | 3.847920736 | RNU6-1053P     |
| PDRG1       | mRNA        | 9.455411 | 39.07127382 | 3.832587134 | NM_030815.2    |
| HIST1H4B    | mRNA        | 47.4125  | 184.5085678 | 3.831831923 | NM_003544.2    |
| RAB3IL1     | mRNA        | 3.3933   | 15.81838149 | 3.828189101 | NM_013401.3    |
| HIST1H2AB   | mRNA        | 17.57016 | 69.95018731 | 3.820656185 | NM_003513.2    |
| PXMP2       | mRNA        | 5.32321  | 22.84288357 | 3.770692868 | NM_018663.2    |
| GORASP2     | mRNA        | 30.55068 | 117.89711   | 3.768448998 | NM_015530.4    |
| RNU6-817P   | ncRNA       | 0        | 2.765769177 | 3.765769177 | RNU6-817P      |
| SNORD124    | snoRNA      | 0        | 2.765769177 | 3.765769177 | NR_102369.1    |
| JMJD8       | mRNA        | 7.378828 | 30.53988715 | 3.764236108 | NM_001005920.2 |
| LOC10192806 | lncRNA      | 3.107946 | 14.44999972 | 3.761003514 | NR_120586.1    |
| MIR4724     | miRNA       | 1.846434 | 9.695730148 | 3.757589016 | NR_039877.1    |
| MZT2B       | mRNA        | 5.725526 | 23.99930271 | 3.717077525 | NM_025029.3    |
| MIR1825     | miRNA       | 0        | 2.713584853 | 3.713584853 | NR_031726.1    |
| MIR4657     | miRNA       | 0        | 2.713584853 | 3.713584853 | NR_039801.1    |
| MIR130B     | miRNA       | 4.008113 | 17.53902405 | 3.701797965 | NR_029845.1    |
| SNORA94     | snoRNA      | 2.13419  | 10.58415564 | 3.696060123 |                |
| RNU6-945P   | ncRNA       | 0        | 2.688224247 | 3.688224247 | RNU6-945P      |
| LMNB2       | mRNA        | 27.49493 | 104.0867809 | 3.687911136 | NM_032737.3    |
| FBLN5       | mRNA        | 9.173635 | 36.475368   | 3.683576944 | NM_006329.3    |
| MRPL53      | mRNA        | 7.275797 | 29.42271698 | 3.67610733  | NM_053050.4    |
| HMGN2P5     | ncRNA       | 1.718961 | 8.966183925 | 3.665438655 | HMGN2P5        |
| HIST2H4A    | mRNA        | 1.659926 | 8.716363466 | 3.652870174 | NM_003548.2    |
| HIST1H3I    | mRNA        | 39.61898 | 147.1366009 | 3.646979589 | NM_003533.2    |
| C9orf16     | mRNA        | 2.765767 | 12.70779779 | 3.640107885 | NM_024112.3    |
| MT1F        | mRNA        | 2.721866 | 12.50608671 | 3.628848351 | NM_005949.3    |
| LOC10798596 | lncRNA      | 2.528195 | 11.80061515 | 3.62809214  |                |
| PPIAP22     | ncRNA       | 6.662134 | 26.62613462 | 3.605540304 | PPIAP22        |
| HIST1H1B    | mRNA        | 125.8497 | 456.0368265 | 3.602979518 | NM_005322.2    |
| MIR122      | miRNA       | 7.733301 | 30.45599941 | 3.601845255 | NR_029667.1    |
| CTSH        | mRNA        | 4.376168 | 18.35718972 | 3.600555276 | NM_148979.2    |
| MRPL22      | mRNA        | 10.82431 | 41.56411517 | 3.599713516 | NM_014180.3    |
| RPL10       | mRNA        | 39.9103  | 146.1909742 | 3.597895094 | NM_006013      |
| LOC10537802 | lncRNA      | 4.301902 | 18.07162268 | 3.597128593 | XR_955078.1    |

|             |             |          |             |             |                |
|-------------|-------------|----------|-------------|-------------|----------------|
| MTFP1       | mRNA        | 4.757675 | 19.69366159 | 3.594100617 | NM_016498.4    |
| HIST2H3C    | mRNA        | 2.917148 | 13.04875714 | 3.586476297 | NM_021059.2    |
| TIMM10      | mRNA        | 22.43116 | 83.00590342 | 3.58522126  | NM_012456.2    |
| RPS7P1      | ncRNA       | 5.097468 | 20.81884745 | 3.578345705 | RPS7P1         |
| RPS25P6     | ncRNA       | 5.061581 | 20.67227886 | 3.575351101 | NM_001089589.2 |
| EFNA1       | mRNA        | 4.092576 | 17.17390771 | 3.56870653  | NM_182685.1    |
| RNU7-103P   | ncRNA       | 0        | 2.568214236 | 3.568214236 |                |
| EFNA3       | mRNA        | 0.276654 | 3.551111042 | 3.564873487 | NM_004952.4    |
| LOC10272412 | mRNA        | 0.314613 | 3.671218818 | 3.553304452 | XR_932558.1    |
| LOC729998   | ncRNA       | 48.51616 | 174.7826474 | 3.550005566 | LOC729998      |
| RPL12P38    | ncRNA       | 0        | 2.539357896 | 3.539357896 | RPL12P38       |
| VPS4A       | mRNA        | 13.14057 | 48.97546779 | 3.534190384 | NM_013245.2    |
| AKR1B1      | mRNA        | 4.895015 | 19.78799961 | 3.526369184 | NM_001628.2    |
| RASD1       | mRNA        | 4.230532 | 17.44269989 | 3.52597045  | NM_016084.4    |
| TECRP1      | ncRNA       | 0.578636 | 4.557675967 | 3.520555495 | TECRP1         |
| TNFRSF12A   | mRNA        | 13.9993  | 51.51345495 | 3.501061215 | NM_016639.2    |
| C19orf70    | mRNA        | 1.643327 | 8.236963476 | 3.494446666 | NM_205767      |
| HIST1H1C    | mRNA        | 122.576  | 430.2811391 | 3.490007472 | NM_005319.3    |
| HIST1H3D    | mRNA        | 25.87213 | 92.6007148  | 3.483188912 | NM_003530.4    |
| RPL3P4      | ncRNA       | 3.08767  | 13.21102271 | 3.476558353 | RPL3P4         |
| HIST3H2A    | mRNA        | 4.638422 | 18.55741899 | 3.468598213 | NM_033445.2    |
| SNORA71D    | snoRNA      | 10.71735 | 39.60260792 | 3.465170812 | NR_003018.2    |
| BCL2L12     | mRNA        | 6.955879 | 26.56415533 | 3.464627108 | NR_104200.1    |
| HIST1H3H    | mRNA        | 16.32904 | 58.98748299 | 3.461674334 | NM_003536.2    |
| CHCHD10     | mRNA        | 8.661083 | 32.31461795 | 3.448331686 | NR_125755.1    |
| NDUFB1      | mRNA        | 19.95468 | 71.22514147 | 3.446731    | NM_004545.3    |
| HMG2P41     | ncRNA       | 28.07694 | 99.13220912 | 3.44369888  | HMG2P41        |
| MIR18A      | miRNA       | 6.943633 | 26.33323892 | 3.440898966 | NR_029488.1    |
| RNA5SP284   | ncRNA       | 0        | 2.437627071 | 3.437627071 | RNA5SP284      |
| MIR4673     | Precursor_m | 0        | 2.437627071 | 3.437627071 | NR_039820.1    |
| HIST1H2BH   | mRNA        | 20.87991 | 74.10959855 | 3.43281063  | NM_003524.2    |
| MIR6783     | Precursor_m | 2.567698 | 11.23593728 | 3.429645238 | NR_106841.1    |
| PNKP        | mRNA        | 5.633717 | 21.72759981 | 3.426073348 | NM_007254.3    |
| CLDN6       | mRNA        | 11.15543 | 40.62652475 | 3.424521499 | NM_021195.4    |
| S100A11     | mRNA        | 9.406246 | 34.62333266 | 3.423264527 | NM_005620.1    |
| HIST1H1D    | mRNA        | 16.28522 | 58.12030775 | 3.420281376 | NM_005320.2    |
| RBP2        | mRNA        | 6.687957 | 25.29392392 | 3.420144649 | NM_004164.2    |
| PNKD        | mRNA        | 6.543754 | 24.75514403 | 3.414101985 | NM_022572.4    |
| MRPS26      | mRNA        | 17.87256 | 63.25865132 | 3.404872078 | NM_030811.3    |
| CD320       | mRNA        | 8.93255  | 32.76474756 | 3.399403693 | NM_016579.3    |
| RNU4-39P    | ncRNA       | 1.293958 | 6.794645537 | 3.397902648 | RNU4-39P       |
| MIR4690     | Precursor_m | 0        | 2.396999953 | 3.396999953 | NR_039839.1    |
| KXD1        | mRNA        | 10.79835 | 38.86667208 | 3.379003761 | NM_024069.3    |
| GSTO1       | mRNA        | 42.75447 | 146.4052195 | 3.368917663 | NM_004832.2    |
| MIR6815     | miRNA       | 0        | 2.357704872 | 3.357704872 | NR_106873.1    |
| MIR6850     | miRNA       | 0        | 2.357704872 | 3.357704872 | NR_106909.1    |

|             |             |          |             |             |                |
|-------------|-------------|----------|-------------|-------------|----------------|
| MIR6890     | miRNA       | 0        | 2.357704872 | 3.357704872 | NR_106950.1    |
| MIR6733     | Precursor_m | 0        | 2.357704872 | 3.357704872 | NR_106791.1    |
| MRPL12      | mRNA        | 7.285684 | 26.78027534 | 3.35280411  | NM_002949.3    |
| SNORD57     | snoRNA      | 2.282398 | 9.987499805 | 3.34740031  | NR_002738.1    |
| ID3         | mRNA        | 23.07819 | 79.51307351 | 3.343817103 | NM_002167.4    |
| MRT04       | mRNA        | 6.760957 | 24.93604485 | 3.341861664 | NM_016183.3    |
| COMMD4      | mRNA        | 4.337465 | 16.83152358 | 3.340822349 | NR_104312.1    |
| HAX1        | mRNA        | 18.32134 | 63.52559876 | 3.339602285 | NM_006118.3    |
| SNRNPB      | mRNA        | 57.29551 | 192.841037  | 3.325145117 | NM_198216.1    |
| MT1A        | mRNA        | 0.829963 | 5.084545355 | 3.324955618 | NM_005946.2    |
| MIR6742     | miRNA       | 0        | 2.319677374 | 3.319677374 | NR_106800.1    |
| RNU7-16P    | ncRNA       | 0        | 2.319677374 | 3.319677374 | U7.16          |
| MIR6872     | Precursor_m | 0        | 2.319677374 | 3.319677374 | NR_106932.1    |
| SNORD59B    | snoRNA      | 2.191102 | 9.587999813 | 3.317975988 | NR_003046.1    |
| SGTA        | mRNA        | 19.49239 | 66.901493   | 3.313497798 | NM_003021.3    |
| SNORD19     | snoRNA      | 2.162272 | 9.461841921 | 3.308331123 | NR_003047.1    |
| YDJC        | mRNA        | 3.228143 | 12.97823179 | 3.305997949 | NM_001017965.1 |
| HIST1H2BJ   | mRNA        | 37.58127 | 126.1788749 | 3.296388909 | NM_021058.3    |
| MRPL49      | mRNA        | 6.804827 | 24.71157496 | 3.294317284 | NR_037567.1    |
| RAD23A      | mRNA        | 35.37529 | 118.7837868 | 3.292999026 | NR_072976.1    |
| PTMAP2      | ncRNA       | 5.182274 | 19.33513655 | 3.289264614 | V9HVV6_HUMAN   |
| MIR3131     | Precursor_m | 0        | 2.282857098 | 3.282857098 | NR_036081.1    |
| SNORD49A    | snoRNA      | 55.54906 | 184.3326725 | 3.277378204 | NR_002744.1    |
| TRMT112     | mRNA        | 14.14628 | 48.59341369 | 3.274296067 | NM_016404.2    |
| HIST1H2BL   | mRNA        | 15.96167 | 54.28966781 | 3.259682988 | NM_003519.3    |
| SCYL1       | mRNA        | 9.69052  | 33.82207561 | 3.257285493 | NM_020680.3    |
| RAMP2       | mRNA        | 0.209341 | 2.931363    | 3.250830944 | NM_005854.2    |
| SNRPG       | mRNA        | 27.62884 | 92.02187868 | 3.249237194 | NM_003096.2    |
| NFKBID      | mRNA        | 3.38133  | 13.23595934 | 3.249232204 | NM_139239.1    |
| MIR6513     | miRNA       | 0        | 2.247187456 | 3.247187456 | NR_106768.1    |
| MIR6738     | miRNA       | 0        | 2.247187456 | 3.247187456 | NR_106796.1    |
| MIR6877     | miRNA       | 0        | 2.247187456 | 3.247187456 | NR_106937.1    |
| TCTN3       | mRNA        | 8.27963  | 29.03704215 | 3.236879398 | NM_015631.5    |
| P3H4        | mRNA        | 3.999752 | 15.1521068  | 3.230581877 | NM_006455.2    |
| STRA13      | mRNA        | 5.005781 | 18.39994742 | 3.230212082 | NM_144998.3    |
| ACY3        | mRNA        | 7.200973 | 25.49066006 | 3.230185054 | NM_080658.1    |
| HIST1H2BE   | mRNA        | 44.57759 | 146.134342  | 3.228216633 | NM_003523.2    |
| TIGD5       | mRNA        | 0.953838 | 5.306790941 | 3.227898705 | NM_032862.4    |
| NDUFS6      | mRNA        | 17.75756 | 59.26648236 | 3.212917386 | NM_004553.4    |
| MIR7109     | miRNA       | 0        | 2.212615341 | 3.212615341 | NR_106959.1    |
| MIR4658     | Precursor_m | 0        | 2.212615341 | 3.212615341 | NR_039802.1    |
| LOC10537182 | lncRNA      | 0.270729 | 3.080164685 | 3.210884387 | XR_934846.1    |
| SNORD14D    | snoRNA      | 7.555524 | 26.44965466 | 3.208412975 | NR_001454.2    |
| PCBD1       | mRNA        | 16.49013 | 55.11441069 | 3.208347718 | NM_001289797.1 |
| SERPINC1    | mRNA        | 6.610549 | 23.38602787 | 3.204240507 | NM_000488.3    |
| RPL35       | mRNA        | 296.156  | 947.0234163 | 3.190322149 | NM_007209.3    |

|              |             |          |             |             |                |
|--------------|-------------|----------|-------------|-------------|----------------|
| SDHB         | mRNA        | 7.41136  | 25.82024234 | 3.188573918 | NM_003000.2    |
| HIST1H3F     | mRNA        | 15.86903 | 52.77514918 | 3.187802765 | NM_021018.2    |
| TMEM109      | mRNA        | 65.16877 | 209.4664783 | 3.180752529 | NM_024092.2    |
| MIR6754      | miRNA       | 0        | 2.179090867 | 3.179090867 | NR_106812.1    |
| MIR6860      | miRNA       | 0        | 2.179090867 | 3.179090867 | NR_106920.1    |
| MIR6852      | miRNA       | 0        | 2.179090867 | 3.179090867 | NR_106911.1    |
| MIR4641      | miRNA       | 0        | 2.179090867 | 3.179090867 | NR_039784.2    |
| MIR1249      | Precursor_m | 0        | 2.179090867 | 3.179090867 | NR_031651.1    |
| MIR6816      | Precursor_m | 0        | 2.179090867 | 3.179090867 | NR_106874.1    |
| HIST2H2AB    | mRNA        | 10.6376  | 35.9549993  | 3.175481608 | NM_175065.2    |
| APOA1        | mRNA        | 57.45616 | 184.6100208 | 3.175200434 | NM_000039.1    |
| TAGLN2       | mRNA        | 23.47609 | 76.70997979 | 3.174934015 | NM_003564.2    |
| RPS27AP16    | ncRNA       | 15.89291 | 52.57636261 | 3.171530227 | RPS27AP16      |
| SNRPD2       | mRNA        | 32.35805 | 104.5779726 | 3.164992677 | NM_177542.2    |
| LIPA         | mRNA        | 8.029283 | 27.48351738 | 3.154571489 | NR_110233.1    |
| MRPS17       | mRNA        | 8.973797 | 30.43290043 | 3.151548174 | NM_015969.2    |
| CKS1BP3      | ncRNA       | 0.455215 | 3.585540096 | 3.151108111 | CKS1BP3        |
| MIR6829      | miRNA       | 0        | 2.146567122 | 3.146567122 | NR_106887.1    |
| RN7SKP80     | ncRNA       | 0        | 2.146567122 | 3.146567122 | RN7SKP80       |
| MIR611       | Precursor_m | 0        | 2.146567122 | 3.146567122 | NR_030342.1    |
| MIR3658      | miRNA       | 5.869023 | 20.54571388 | 3.136648867 | NR_037431.1    |
| FAM173A      | mRNA        | 0.430754 | 3.487116577 | 3.136190138 | NM_023933.2    |
| RHBDD2       | mRNA        | 7.612854 | 25.9611177  | 3.130334784 | NM_020684.2    |
| CADM4        | mRNA        | 5.890601 | 20.55515585 | 3.128197002 | NM_145296.1    |
| CCND3        | mRNA        | 1.080718 | 5.507999892 | 3.127766991 | NM_001760.4    |
| AMT          | mRNA        | 3.582183 | 13.32392345 | 3.126004158 | NR_028435.1    |
| GPX1         | mRNA        | 6.528854 | 22.49087023 | 3.12011224  | NM_201397.1    |
| NT5C         | mRNA        | 3.334286 | 12.50608671 | 3.116104427 | NR_045513.1    |
| MIR6804      | miRNA       | 0        | 2.114999959 | 3.114999959 | NR_106862.1    |
| RNY5P8       | ncRNA       | 0        | 2.114999959 | 3.114999959 | RNY5P8         |
| MIR6780A     | Precursor_m | 0        | 2.114999959 | 3.114999959 | NR_106838.1    |
| MIR6870      | miRNA       | 5.477755 | 19.17599963 | 3.114659264 | NR_106930.1    |
| TAB1         | mRNA        | 3.36413  | 12.57978884 | 3.111682981 | NM_153497.2    |
| CDC34        | mRNA        | 20.89453 | 67.11599869 | 3.111096726 | NM_004359.1    |
| HM13         | mRNA        | 54.77755 | 171.9341875 | 3.100426381 | NM_178582.2    |
| HIST1H2BM    | mRNA        | 9.948389 | 32.89156886 | 3.095575839 | NM_003521.2    |
| LOC10798676  | lncRNA      | 0        | 2.091927232 | 3.091927232 |                |
| LOC101927411 | lncRNA      | 0        | 2.084347785 | 3.084347785 | NR_110050.1    |
| MIR4743      | miRNA       | 0        | 2.084347785 | 3.084347785 | NR_039897.2    |
| MIR4499      | Precursor_m | 0        | 2.084347785 | 3.084347785 | NR_039721.1    |
| UFD1L        | mRNA        | 31.15224 | 97.92343051 | 3.07672015  | NM_005659.6    |
| HMGCL        | mRNA        | 2.350529 | 9.301790863 | 3.074675746 | NM_001166059.1 |
| ACAA2        | mRNA        | 16.73916 | 53.54208789 | 3.074671702 | NM_006111.2    |
| RPL24P8      | ncRNA       | 1.79272  | 7.583236216 | 3.07343263  | RPL24P8        |
| GLTSCR2      | mRNA        | 19.3269  | 61.42115517 | 3.070864225 | NM_015710.4    |
| SMAGP        | mRNA        | 6.34956  | 21.56638412 | 3.070440313 | NM_001033873.1 |

|            |             |          |             |             |             |
|------------|-------------|----------|-------------|-------------|-------------|
| PRPF31     | mRNA        | 11.44231 | 37.15734238 | 3.066741005 | NM_015629.3 |
| TAX1BP3    | mRNA        | 6.059989 | 20.59028159 | 3.058118191 | NM_014604.3 |
| H1FX       | mRNA        | 15.37552 | 49.05340316 | 3.056599929 | NM_006026.3 |
| MIR6830    | Precursor_m | 0        | 2.054571388 | 3.054571388 | NR_106888.1 |
| MIR6810    | Precursor_m | 0        | 2.054571388 | 3.054571388 | NR_106868.1 |
| SNORD41    | snoRNA      | 0        | 2.054571388 | 3.054571388 | NR_002751.1 |
| RNU6-103P  | ncRNA       | 1.535819 | 6.720560616 | 3.04460221  | RNU6-103P   |
| RPS10P19   | ncRNA       | 10.83054 | 34.99802213 | 3.042804083 | RPS10P19    |
| EMILIN2    | mRNA        | 1.639637 | 7.031359304 | 3.042599547 | NM_032048.2 |
| ZDHHC12    | mRNA        | 3.743341 | 13.43193596 | 3.042567956 | NM_032799.4 |
| MLLT1      | mRNA        | 10.03335 | 32.56623529 | 3.042252133 | NM_005934.3 |
| LOXL4      | mRNA        | 4.432119 | 15.5155378  | 3.040348969 | NM_032211.6 |
| CAT        | mRNA        | 6.930551 | 23.07372998 | 3.035568438 | NM_001752.3 |
| MRPL28     | mRNA        | 7.351724 | 24.34847321 | 3.035118709 | NM_006428.4 |
| BTG2       | mRNA        | 7.392545 | 24.44727828 | 3.032128737 | NM_006763.2 |
| C10orf35   | mRNA        | 3.556984 | 12.80771775 | 3.030012493 | NM_145306.2 |
| RPL24P4    | ncRNA       | 15.56037 | 49.15787433 | 3.028790132 | RPL24P4     |
| MIR6748    | miRNA       | 0        | 2.025633763 | 3.025633763 | NR_106806.1 |
| MIR20A     | miRNA       | 0        | 2.025633763 | 3.025633763 | NR_029492.1 |
| MIR503     | miRNA       | 0        | 2.025633763 | 3.025633763 | NR_030228.1 |
| TRNF       | tRNA        | 0        | 2.025633763 | 3.025633763 | TRNF        |
| RABAC1     | mRNA        | 3.461778 | 12.47509269 | 3.020117076 | NM_006423.2 |
| CKS1B      | mRNA        | 12.80514 | 40.62447973 | 3.015143274 | NR_024163.1 |
| AURKAIP1   | mRNA        | 8.299629 | 27.02072675 | 3.013101639 | NM_017900.2 |
| GADD45GIP1 | mRNA        | 7.968949 | 26.01200473 | 3.01172466  | NM_052850.3 |
| CCDC107    | mRNA        | 1.306301 | 5.944864749 | 3.011257042 | NM_174923.2 |
| RASSF7     | mRNA        | 1.045494 | 5.157223728 | 3.010140184 | NM_003475.3 |
| HIST1H2AG  | mRNA        | 15.83929 | 49.67277011 | 3.009198451 | NM_021064.4 |
| PIPOX      | mRNA        | 1.635151 | 6.916716283 | 3.004274535 | NM_016518.2 |
| RPS25P1    | ncRNA       | 1.022817 | 5.072489528 | 3.001996006 | RPS25P1     |
| TRA-TGC1-1 | tRNA        | 0        | 1.997499961 | 2.997499961 | TRNAA19     |
| TRC-GCA3-1 | tRNA        | 0        | 1.997499961 | 2.997499961 | TRNAC8      |
| RNF126     | mRNA        | 19.02275 | 58.92261703 | 2.992726747 | NM_194460.2 |
| CTDSP1     | mRNA        | 9.086976 | 29.1771269  | 2.991692154 | NM_182642.2 |
| RN7SL11P   | ncRNA       | 0        | 1.990588196 | 2.990588196 | RN7SL11P    |
| AGT        | mRNA        | 33.07004 | 100.8521033 | 2.989491925 | NM_000029.3 |
| KRT8       | mRNA        | 208.2821 | 624.1787878 | 2.987254278 | NR_045962.1 |
| HIST1H3B   | mRNA        | 67.89167 | 203.8465638 | 2.973459246 | NM_003537.3 |
| RPL13      | mRNA        | 19.06428 | 58.64235759 | 2.972564688 | NM_033251.2 |
| FAM98C     | mRNA        | 1.804437 | 7.331999857 | 2.971006313 | NM_174905.3 |
| TRK-CTT3-1 | tRNA        | 0        | 1.970136948 | 2.970136948 | TRNAK15     |
| TRF-GAA1-6 | tRNA        | 0        | 1.970136948 | 2.970136948 | TRNAF7      |
| TRM-CAT2-1 | tRNA        | 0        | 1.970136948 | 2.970136948 | TRNAM9      |
| TRR-CCT5-1 | tRNA        | 0        | 1.970136948 | 2.970136948 | TRR-CCT5-1  |
| TRR-CCG2-1 | tRNA        | 0        | 1.970136948 | 2.970136948 | TRR4        |
| RPL29P4    | ncRNA       | 12.79537 | 39.96219769 | 2.96927213  | RPL29P4     |

|             |             |          |             |             |              |
|-------------|-------------|----------|-------------|-------------|--------------|
| NABP2       | mRNA        | 6.298856 | 20.67227886 | 2.969270704 | NM_024068.3  |
| MTCH1       | mRNA        | 6.770077 | 22.03762257 | 2.964915771 | NR_130739.1  |
| LOC10028704 | ncRNA       | 3.641048 | 12.74623313 | 2.961881028 | LOC100287046 |
| S100A4      | mRNA        | 4.079179 | 14.02499973 | 2.958155042 | NM_019554.2  |
| RTFDC1      | mRNA        | 18.50633 | 56.60917052 | 2.953357757 | NM_016407.4  |
| PYCR1       | mRNA        | 10.59736 | 33.1694127  | 2.946309938 | NM_153824.2  |
| MIR4655     | miRNA       | 0        | 1.943513476 | 2.943513476 | NR_039799.1  |
| RPL8        | mRNA        | 181.1794 | 534.6672589 | 2.94032794  | NM_033301.1  |
| RPL18AP3    | ncRNA       | 9.217376 | 29.04057636 | 2.940145861 | NR_001593.1  |
| WDR34       | mRNA        | 7.68332  | 24.5237619  | 2.939401371 | NM_052844.3  |
| CIAPIN1     | mRNA        | 6.85347  | 22.08052203 | 2.938894851 | NM_020313    |
| RPL34P35    | ncRNA       | 0        | 1.936969659 | 2.936969659 | RPL34P35     |
| EGFL7       | mRNA        | 2.06836  | 8.005580415 | 2.934981792 | NR_045110.1  |
| SCARNA28    | ncRNA       | 3.388302 | 11.86144307 | 2.930847258 |              |
| TADA3       | mRNA        | 9.352265 | 29.2825445  | 2.925209658 | NR_103488.1  |
| C9orf116    | mRNA        | 0.227608 | 2.589556736 | 2.924026282 | NM_144654.2  |
| RPS2P5      | ncRNA       | 7.257593 | 23.13823299 | 2.923155923 | RPS2P5       |
| MIR1226     | miRNA       | 0        | 1.917599963 | 2.917599963 | NR_031595.1  |
| MIR6750     | miRNA       | 0        | 1.917599963 | 2.917599963 | NR_106808.1  |
| MIR4525     | miRNA       | 0        | 1.917599963 | 2.917599963 | NR_039751.1  |
| MIR4661     | miRNA       | 0        | 1.917599963 | 2.917599963 | NR_039805.1  |
| NMB         | mRNA        | 1.595463 | 6.562660066 | 2.913800416 | NM_205858.1  |
| CCDC51      | mRNA        | 1.862606 | 7.335486719 | 2.91185257  | NM_024661.4  |
| NCAPH2      | mRNA        | 3.735922 | 12.74301345 | 2.901866811 | NM_152299.3  |
| ARHGDI1     | mRNA        | 27.09895 | 80.53412541 | 2.901679066 | NR_125441.1  |
| WBP1        | mRNA        | 3.359212 | 11.64201122 | 2.900068012 | NM_012477.3  |
| FARSA       | mRNA        | 14.98771 | 45.32697159 | 2.897662349 | NM_004461.2  |
| CD81        | mRNA        | 12.65572 | 38.51422329 | 2.893601628 | NM_004356.3  |
| PKDCC       | mRNA        | 5.190835 | 16.90646908 | 2.892415628 | NM_138370.2  |
| MIR4254     | Precursor_m | 0        | 1.892368384 | 2.892368384 | NR_036216.1  |
| MIR4732     | Precursor_m | 0        | 1.892368384 | 2.892368384 | NR_039885.1  |
| GOLGA2      | mRNA        | 12.85557 | 39.06466545 | 2.891592534 | NM_004486.4  |
| IL10RB      | mRNA        | 5.028026 | 16.42818938 | 2.891193461 | NM_000628.4  |
| IHH         | mRNA        | 2.8552   | 10.13403455 | 2.888055913 | NM_002181.3  |
| CLPP        | mRNA        | 3.283798 | 11.37065139 | 2.887776865 | NM_006012.2  |
| NOP16       | mRNA        | 12.40246 | 37.66455776 | 2.884884251 | NM_016391.6  |
| MRPL51      | mRNA        | 35.43954 | 104.0942373 | 2.884071654 | NM_016497.3  |
| PSMC3       | mRNA        | 20.91849 | 62.17905842 | 2.882454746 | NM_002804.4  |
| SLC1A7      | mRNA        | 0.857985 | 4.355147844 | 2.882234788 | NR_109858.1  |
| ISOC2       | mRNA        | 11.37688 | 34.66430702 | 2.881527428 | NM_024710.2  |
| MST1P2      | miscRNA     | 1.184492 | 5.292314009 | 2.880447547 | NR_027504.1  |
| UCK1        | mRNA        | 5.189452 | 16.77899967 | 2.872467444 | NM_031432.2  |
| PRDX5       | mRNA        | 15.07139 | 45.13246321 | 2.870470871 | NM_181652.2  |
| RPS6KA1     | mRNA        | 3.75001  | 12.63314136 | 2.870128705 | NM_002953.3  |
| SLC39A5     | mRNA        | 3.386715 | 11.58643537 | 2.869216548 | NM_173596.2  |
| CAPN1       | mRNA        | 9.338302 | 28.65127312 | 2.868098916 | NR_040008.1  |



|            |             |          |             |             |                |
|------------|-------------|----------|-------------|-------------|----------------|
| MIR5704    | miRNA       | 0        | 1.867792171 | 2.867792171 | NR_049890.1    |
| MIR7703    | miRNA       | 0        | 1.867792171 | 2.867792171 | NR_106990.1    |
| MIR26B     | Precursor_m | 0        | 1.867792171 | 2.867792171 | NR_029500.1    |
| RHOG       | mRNA        | 2.192564 | 8.155236665 | 2.867675479 | NM_001665.3    |
| SZRD1      | mRNA        | 11.86895 | 35.89771571 | 2.867188403 | NR_073500.1    |
| SNORD30    | snoRNA      | 9.390437 | 28.76399944 | 2.864556998 | NR_002561.1    |
| CDIPT      | mRNA        | 6.466395 | 20.37324199 | 2.862591943 | NM_145752.1    |
| TMEM208    | mRNA        | 4.148903 | 13.7347308  | 2.861722157 | NM_014187.3    |
| SLC25A1    | mRNA        | 22.0935  | 65.0227233  | 2.858930613 | NR_046298.2    |
| IL32       | mRNA        | 9.915486 | 30.19872829 | 2.85820797  | NM_004221.4    |
| APOC3      | mRNA        | 2.466531 | 8.904427594 | 2.857157961 | NM_000040.1    |
| HSPB1      | mRNA        | 30.96122 | 90.26829255 | 2.855594416 | NM_001540.3    |
| IER5       | mRNA        | 2.3857   | 8.658676176 | 2.852785339 | NM_016545.4    |
| CCT7       | mRNA        | 55.72106 | 160.6650559 | 2.850176869 | NR_029402.1    |
| RPS6KB2    | mRNA        | 24.71038 | 72.21245916 | 2.847583988 | NM_003952.2    |
| SNORA70    | snoRNA      | 6.086394 | 19.17599963 | 2.847146003 | NR_000011.1    |
| TMEM160    | mRNA        | 1.898802 | 7.25142843  | 2.84649641  | NM_017854.1    |
| SNORA65    | snoRNA      | 6.041642 | 19.03499963 | 2.845217198 | NR_002449.2    |
| RPL37      | mRNA        | 134.0829 | 383.2757123 | 2.844740256 | NM_000997.4    |
| MIR301B    | miRNA       | 0        | 1.843846118 | 2.843846118 | NR_030622.1    |
| MIR92A1    | miRNA       | 0        | 1.843846118 | 2.843846118 | NR_029508.1    |
| MIR1286    | Precursor_m | 0        | 1.843846118 | 2.843846118 | NR_031618.1    |
| TMEM223    | mRNA        | 5.787596 | 18.26529313 | 2.838308753 | NM_001080501.2 |
| HIST1H2AL  | mRNA        | 21.67792 | 63.34199876 | 2.837208495 | NM_003511.2    |
| RHOD       | mRNA        | 6.38185  | 19.92916113 | 2.83521878  | NM_014578.3    |
| MIR7-1     | Precursor_m | 16.43327 | 48.37581724 | 2.832275952 | NR_029605.1    |
| C14orf80   | mRNA        | 1.729817 | 6.728420921 | 2.83111281  | NM_173608.2    |
| AES        | mRNA        | 18.34655 | 53.75090804 | 2.830009181 | NM_198970.1    |
| YY1        | mRNA        | 22.26476 | 64.73948592 | 2.825711001 | NM_003403.4    |
| MED26      | mRNA        | 4.438633 | 14.36393188 | 2.824961989 | NM_004831.3    |
| TRIP6      | mRNA        | 9.942501 | 29.88041038 | 2.822061587 | NM_003302.2    |
| MIR5088    | miRNA       | 0        | 1.820506294 | 2.820506294 | NR_049811.2    |
| MIR101-2   | Precursor_m | 0        | 1.820506294 | 2.820506294 | NR_029836.1    |
| LYPLA2     | mRNA        | 9.408358 | 28.33857769 | 2.818751832 | NM_007260.2    |
| THOC6      | mRNA        | 4.744816 | 15.19225322 | 2.818585201 | NM_024339.3    |
| GCHFR      | mRNA        | 5.301053 | 16.74201931 | 2.815722812 | NM_005258.2    |
| HIST2H2AA3 | mRNA        | 1.846434 | 7.002471773 | 2.811402272 | NM_003516.2    |
| COX7B      | mRNA        | 17.65855 | 51.4093411  | 2.808864281 | NM_001866.2    |
| AGPAT2     | mRNA        | 17.62224 | 51.28465016 | 2.80764634  | NM_006412.3    |
| SYNPR-AS1  | lncRNA      | 0        | 1.804193513 | 2.804193513 | NR_046677.1    |
| DCTN3      | mRNA        | 2.583847 | 9.045282842 | 2.802933185 | NM_024348.3    |
| JTB        | mRNA        | 5.846651 | 18.18308732 | 2.801820599 | NM_006694.3    |
| FABP5      | mRNA        | 11.01546 | 32.65953425 | 2.801352561 | NM_001444.2    |
| MIR6781    | miRNA       | 2.567698 | 8.988749825 | 2.799774753 | NR_106839.1    |
| DNAL4      | mRNA        | 0.77359  | 3.965447132 | 2.799658724 | NM_005740.2    |
| SEPW1      | mRNA        | 15.19514 | 44.32808133 | 2.798868975 | NM_003009.2    |

|             |         |          |             |             |                |
|-------------|---------|----------|-------------|-------------|----------------|
| FOXP4       | mRNA    | 12.09913 | 35.65884953 | 2.798572169 | NM_138457.2    |
| MIR7107     | miRNA   | 0        | 1.797749965 | 2.797749965 | NR_106957.1    |
| MIR4492     | miRNA   | 0        | 1.797749965 | 2.797749965 | NR_039713.1    |
| RN7SKP180   | ncRNA   | 0        | 1.797749965 | 2.797749965 | RN7SKP180      |
| HIST1H3C    | mRNA    | 109.9131 | 308.9466606 | 2.794499439 | NM_003531.2    |
| HIST2H2BA   | miscRNA | 0.957278 | 4.468194088 | 2.793775478 | NR_027337.1    |
| HIST1H2AC   | mRNA    | 38.52487 | 109.3137341 | 2.790995472 | NM_003512.3    |
| NAT9        | mRNA    | 2.008279 | 7.394032725 | 2.790310275 | NR_130953.1    |
| CPTP        | mRNA    | 1.639051 | 6.361508983 | 2.789453396 | NM_001029885.1 |
| CCDC94      | mRNA    | 4.234771 | 13.58929107 | 2.78699688  | NM_018074.4    |
| SNHG7       | lncRNA  | 10.27079 | 30.40312441 | 2.78623971  | NR_003672.2    |
| USP5        | mRNA    | 14.57416 | 42.36627934 | 2.784502236 | NM_003481.2    |
| SLC25A4     | mRNA    | 1.264097 | 5.303769127 | 2.784230653 | NM_001151.3    |
| SNORD34     | snoRNA  | 2.489889 | 8.716363466 | 2.78414714  | NR_000019.1    |
| TMSB10      | mRNA    | 219.5648 | 611.3841789 | 2.776436762 | NM_021103.3    |
| LOC10537703 | lncRNA  | 0        | 1.775555521 | 2.775555521 | XR_940727.1    |
| MIR29B1     | miRNA   | 0        | 1.775555521 | 2.775555521 | NR_029517.1    |
| MIR6785     | miRNA   | 0        | 1.775555521 | 2.775555521 | NR_106843.1    |
| MIR4502     | miRNA   | 0        | 1.775555521 | 2.775555521 | NR_039724.1    |
| LOC10798520 | lncRNA  | 4.956064 | 15.52342827 | 2.774219373 |                |
| POLR2L      | mRNA    | 2.438727 | 8.537260107 | 2.773486054 | NM_021128.4    |
| MVB12A      | mRNA    | 4.737111 | 14.905161   | 2.772329123 | NM_138401.3    |
| SYNGR2      | mRNA    | 4.913915 | 15.3827024  | 2.770195888 | NM_004710.3    |
| EDF1        | mRNA    | 58.27399 | 163.0299968 | 2.767318322 | NM_153200.2    |
| TPGS1       | mRNA    | 0.295032 | 2.582046628 | 2.765991491 | NM_033513.2    |
| CORO1B      | mRNA    | 21.94504 | 62.45599257 | 2.765564295 | NM_020441.2    |
| TSR3        | mRNA    | 1.910845 | 7.04765767  | 2.764715508 | NM_001001410.2 |
| CFAP20      | mRNA    | 5.163458 | 16.01274559 | 2.760260026 | NM_013242.2    |
| TUBB4B      | mRNA    | 179.103  | 495.7315302 | 2.758041957 | NM_006088.5    |
| RAB1B       | mRNA    | 79.14607 | 219.9998638 | 2.757463387 | NM_030981.2    |
| SNORD58C    | snoRNA  | 10.95551 | 31.95999938 | 2.756887776 | NR_003701.1    |
| ATP6V0C     | mRNA    | 33.28432 | 93.48299818 | 2.755865793 | NM_001694.3    |
| SLC25A10    | mRNA    | 4.616086 | 14.47626376 | 2.755702932 | NM_012140.4    |
| FTLP3       | ncRNA   | 0.184851 | 2.264881846 | 2.755520738 | FTLP3          |
| MIR1301     | miRNA   | 0        | 1.753902405 | 2.753902405 | NR_031570.1    |
| MIR4761     | miRNA   | 0        | 1.753902405 | 2.753902405 | NR_039918.1    |
| CDCA5       | mRNA    | 12.43978 | 36.01083004 | 2.753827594 | NM_080668.3    |
| LOC10537023 | lncRNA  | 0        | 1.749635002 | 2.749635002 | XR_942013.1    |
| DDOST       | mRNA    | 28.36787 | 79.68953748 | 2.747545164 | NM_005216.4    |
| TOMM40      | mRNA    | 37.48098 | 104.7124508 | 2.747135368 | NM_006114.2    |
| IDH3B       | mRNA    | 16.60246 | 47.29216124 | 2.74348901  | NM_174856.1    |
| RPL10A      | mRNA    | 42.51728 | 118.2749669 | 2.740864665 | NM_007104.4    |
| GAMT        | mRNA    | 12.44804 | 35.85337409 | 2.740428044 | NM_138924.2    |
| GRK2        | mRNA    | 30.10857 | 84.22907501 | 2.73973009  | NM_001619.3    |
| NARF        | mRNA    | 6.479827 | 19.49208753 | 2.739647428 | NM_031968.2    |
| LOC10798456 | lncRNA  | 52.6868  | 146.0157223 | 2.738395879 |                |

|             |             |          |             |             |             |
|-------------|-------------|----------|-------------|-------------|-------------|
| MKNK2       | mRNA        | 14.06705 | 40.20120397 | 2.734523881 | NM_199054.2 |
| MRPL41      | mRNA        | 3.809035 | 12.14374148 | 2.733134956 | NM_032477.2 |
| MIR378H     | Precursor_m | 0        | 1.732771051 | 2.732771051 | NR_039667.1 |
| MIR762      | Precursor_m | 0        | 1.732771051 | 2.732771051 | NR_031576.1 |
| UPF1        | mRNA        | 28.2442  | 78.88703598 | 2.731722421 | NM_002911.3 |
| NDUFB9      | mRNA        | 19.65592 | 55.40770406 | 2.730824803 | NM_005005.2 |
| DNAJB2      | mRNA        | 4.259502 | 13.34649574 | 2.727728776 | NM_006736.5 |
| TRIB3       | mRNA        | 5.616516 | 17.0016402  | 2.720712871 | NM_021158.4 |
| CHCHD2      | mRNA        | 39.9774  | 110.3215506 | 2.716656947 | NM_016139.2 |
| RPS3AP6     | ncRNA       | 3.252218 | 10.54791598 | 2.715739561 | RPS3AP6     |
| MIR501      | miRNA       | 0        | 1.712142824 | 2.712142824 | NR_030225.1 |
| MIR500A     | miRNA       | 0        | 1.712142824 | 2.712142824 | NR_030224.1 |
| RNA5SP113   | ncRNA       | 0        | 1.712142824 | 2.712142824 | RNA5SP113   |
| APEX2       | mRNA        | 4.078901 | 12.76874438 | 2.710969187 | NM_014481.3 |
| ASRGL1      | mRNA        | 5.162994 | 15.69594016 | 2.709063383 | NM_025080.3 |
| RPL29       | mRNA        | 73.77236 | 201.5549313 | 2.708954813 | NM_000992.2 |
| SMOC1       | mRNA        | 3.119684 | 10.1519998  | 2.707003694 | NM_022137.5 |
| FADD        | mRNA        | 6.740033 | 19.94697209 | 2.706315557 | NM_003824.3 |
| HIST1H2AD   | mRNA        | 31.25543 | 86.29199832 | 2.706273339 | NM_021065.3 |
| PTPN9       | mRNA        | 9.580864 | 27.63385497 | 2.70619245  | NM_002833.3 |
| COX5A       | mRNA        | 34.57388 | 95.25740074 | 2.705844702 | NM_004255.3 |
| RPL18A      | mRNA        | 33.30736 | 91.7361532  | 2.703097696 | NM_000980.3 |
| FAM168A     | mRNA        | 5.803946 | 17.38440212 | 2.70202068  | NM_015159.2 |
| GTF2IRD1    | mRNA        | 5.019862 | 15.25768391 | 2.700673779 | NM_016328.2 |
| S100P       | mRNA        | 23.1999  | 64.29599874 | 2.698192522 | NM_005980.2 |
| FIBP        | mRNA        | 4.079983 | 12.69583423 | 2.696039365 | NM_198897.1 |
| RPL13A      | mRNA        | 62.75531 | 170.6111906 | 2.691715895 | NR_073024.1 |
| OVCA2       | mRNA        | 2.749059 | 9.088996105 | 2.691074097 | NM_080822.2 |
| RPSAP58     | miscRNA     | 0.94106  | 4.220916167 | 2.68972388  | NR_003662.3 |
| C20orf27    | mRNA        | 4.557046 | 13.91806424 | 2.684531476 | NR_047675.1 |
| GMPR2       | mRNA        | 9.796612 | 27.97753419 | 2.683946861 | NR_104265.1 |
| MIR5706     | miRNA       | 2.054158 | 7.19099986  | 2.681917413 | NR_049892.1 |
| NFKBIE      | mRNA        | 0.827712 | 3.900581094 | 2.681265606 | NM_004556.2 |
| HMG20B      | mRNA        | 13.76338 | 38.58143502 | 2.681055655 | NM_006339.2 |
| HIST1H2AH   | mRNA        | 23.91535 | 65.7804561  | 2.680293237 | NM_080596.2 |
| ETNK2       | mRNA        | 1.208328 | 4.917374904 | 2.679572091 | NM_018208.3 |
| DDX39A      | mRNA        | 14.59402 | 40.76649555 | 2.678366372 | NR_038336.1 |
| HIST1H2BC   | mRNA        | 68.28434 | 184.5361608 | 2.67789449  | NM_003526.2 |
| RPL10P16    | ncRNA       | 13.48832 | 37.77488298 | 2.676286392 | RPL10P16    |
| NUP188      | mRNA        | 17.91933 | 49.62358112 | 2.675759934 | NM_015354.2 |
| LOC10192928 | lncRNA      | 0.782536 | 3.766714212 | 2.67411882  | XR_432762   |
| APEH        | mRNA        | 6.48496  | 19.00052579 | 2.672095154 | NM_001640.3 |
| CPSF4       | mRNA        | 6.56847  | 19.22067152 | 2.671698596 | NM_006693.2 |
| EIF2B2      | mRNA        | 6.611696 | 19.3191041  | 2.669457999 | NM_014239.3 |
| RITA1       | mRNA        | 6.883881 | 20.03532353 | 2.668143171 | NM_032848.2 |
| GRHPR       | mRNA        | 31.97466 | 86.93968652 | 2.666887208 | NM_012203.1 |

|              |             |          |             |             |                |
|--------------|-------------|----------|-------------|-------------|----------------|
| LOC100130395 | ncRNA       | 6.118769 | 17.97749965 | 2.665840113 | LOC100130394   |
| PAK4         | mRNA        | 10.61941 | 29.9468532  | 2.663376174 | NM_005884.3    |
| NDUFA11      | mRNA        | 3.68235  | 11.47064163 | 2.663329918 | NR_034166.2    |
| AHSG         | mRNA        | 54.60869 | 147.1007246 | 2.663265748 | NM_001622.2    |
| FBXO6        | mRNA        | 0.105816 | 1.944764933 | 2.66297851  | NM_018438.5    |
| MCCD1P2      | ncRNA       | 0        | 1.662658927 | 2.662658927 | MCCD1P2        |
| PSMB10       | mRNA        | 1.470173 | 5.57552673  | 2.661970326 | NM_002801.3    |
| HIST2H2BF    | mRNA        | 60.86394 | 163.5430599 | 2.659757009 | NM_001161334.1 |
| RPSAP12      | ncRNA       | 0.317858 | 2.503636315 | 2.658583842 | RPSAP12        |
| NDUFA7       | mRNA        | 6.811716 | 19.74730531 | 2.655921586 | NM_005001.3    |
| NDUFB11      | mRNA        | 8.918409 | 25.33483936 | 2.655147566 | NM_019056.6    |
| MIR4511      | miRNA       | 0        | 1.653103416 | 2.653103416 | NR_039736.1    |
| NOC4L        | mRNA        | 2.145589 | 7.340367809 | 2.651448264 | NM_024078      |
| ITPK1        | mRNA        | 4.434837 | 13.39249084 | 2.648191698 | NM_014216.4    |
| PIGQ         | mRNA        | 1.706637 | 6.167155659 | 2.647992705 | NM_148920.2    |
| ARRDC1       | mRNA        | 3.134624 | 9.944634999 | 2.647069156 | NM_152285.2    |
| PPIA         | mRNA        | 59.01189 | 157.8196534 | 2.646469858 | NM_203431.1    |
| NSUN5P1      | miscRNA     | 2.184113 | 7.416554879 | 2.643296674 | NR_033322.3    |
| MIR4257      | Precursor_m | 1.910845 | 6.689302195 | 2.641605035 | NR_036211.1    |
| TMEM18       | mRNA        | 3.636363 | 11.24016927 | 2.640036995 | NM_152834.2    |
| NAXE         | mRNA        | 3.341488 | 10.46031784 | 2.639721383 |                |
| TMEM141      | mRNA        | 28.72948 | 77.44153695 | 2.638509845 | NM_032928.3    |
| OGFOD2       | mRNA        | 1.329779 | 5.145178775 | 2.637666323 | NM_024623      |
| OTUB1        | mRNA        | 8.210064 | 23.28021537 | 2.636269866 | NR_003089.1    |
| FSCN1        | mRNA        | 5.759871 | 16.82014989 | 2.636167099 | NM_003088.3    |
| C14orf2      | mRNA        | 8.207711 | 23.26729596 | 2.635540555 | NM_004894.2    |
| ESRRB        | mRNA        | 2.488093 | 8.191622046 | 2.635142123 | NM_004451.4    |
| MIR425       | Precursor_m | 1.888881 | 6.612413664 | 2.635073432 | NR_029948.1    |
| MIR145       | Precursor_m | 0        | 1.63431815  | 2.63431815  | NR_029686.1    |
| POLD2        | mRNA        | 11.46154 | 31.81975919 | 2.63368444  | NM_006230.3    |
| SNHG12       | lncRNA      | 18.45685 | 50.2104997  | 2.632004025 | NR_024127.1    |
| ZYX          | mRNA        | 34.70464 | 92.85873775 | 2.628754524 | NM_003461.4    |
| DALRD3       | mRNA        | 1.416661 | 5.350834741 | 2.627938023 | NM_018114.5    |
| ITPKA        | mRNA        | 2.399666 | 7.933823534 | 2.627853674 | NM_002220.2    |
| SNORD14C     | snoRNA      | 9.337082 | 26.1490904  | 2.626378448 | NR_001453.2    |
| RPS19        | mRNA        | 19.35618 | 52.41187249 | 2.623865499 | NM_001022.3    |
| UQCRC1       | mRNA        | 13.61817 | 37.35584343 | 2.623847774 | NM_003365.2    |
| EIF3G        | mRNA        | 50.88917 | 135.1423044 | 2.623713267 | NM_003755.3    |
| FAM64A       | mRNA        | 5.088785 | 14.97325118 | 2.62338907  | NM_019013.2    |
| POLDIP2      | mRNA        | 21.68402 | 58.50039144 | 2.623008581 | NM_015584.4    |
| IMPDH1       | mRNA        | 7.184606 | 20.46197811 | 2.622237043 | NM_183243.2    |
| RPS7         | mRNA        | 71.78267 | 189.8502985 | 2.622194298 | NM_001011.3    |
| EAPP         | mRNA        | 6.199315 | 17.87743935 | 2.6221162   | NM_018453.3    |
| ERP29        | mRNA        | 33.04515 | 88.2265336  | 2.620829316 | NM_006817.3    |
| MAB21L2      | mRNA        | 1.721071 | 6.128840617 | 2.619865278 | NM_006439.4    |
| LMAN2        | mRNA        | 19.01666 | 51.42035926 | 2.618836423 | NM_006816.2    |

|             |             |          |             |             |                |
|-------------|-------------|----------|-------------|-------------|----------------|
| SF3B5       | mRNA        | 7.358178 | 20.88024383 | 2.617824469 | NM_031287.2    |
| RBM38       | mRNA        | 5.274081 | 15.42335782 | 2.617651488 | NM_183425.2    |
| GALT        | mRNA        | 8.53828  | 23.95293903 | 2.616083711 | NM_001258332.1 |
| MIR4721     | miRNA       | 0        | 1.615955025 | 2.615955025 | NR_039872.1    |
| MIR125B2    | Precursor_m | 0        | 1.615955025 | 2.615955025 | NR_029694.1    |
| MIR661      | Precursor_m | 0        | 1.615955025 | 2.615955025 | NR_030383.1    |
| EBP         | mRNA        | 49.85373 | 132.0110951 | 2.615562465 | NM_006579.2    |
| COX5B       | mRNA        | 17.24679 | 46.70590008 | 2.614481358 | NM_001862.2    |
| CBX6        | mRNA        | 6.583968 | 18.82607263 | 2.614208267 | NM_014292      |
| ARFRP1      | mRNA        | 2.435946 | 7.98088924  | 2.61380412  | NR_051954.2    |
| HINT2       | mRNA        | 5.040879 | 14.77904879 | 2.612045237 | NM_032593.2    |
| FAM189B     | mRNA        | 4.842404 | 14.2467458  | 2.609669842 | NM_198264.1    |
| PRELID3A    | mRNA        | 2.636856 | 8.48908866  | 2.609145905 | NM_006553.3    |
| MOSPD3      | mRNA        | 3.141854 | 9.803191829 | 2.608298253 | NM_023948.4    |
| OAZ1        | mRNA        | 90.30643 | 237.1020614 | 2.607725109 | NM_004152.3    |
| HLA-A       | mRNA        | 2.397155 | 7.856089232 | 2.606913228 | NM_002116.7    |
| C19orf60    | mRNA        | 6.535958 | 18.63122691 | 2.605007587 | NM_017967.2    |
| LOC729973   | ncRNA       | 2.827228 | 8.96941918  | 2.604866543 | LOC729973      |
| NAGLU       | mRNA        | 2.598145 | 8.371843171 | 2.604632121 | NM_000263.3    |
| RAB34       | mRNA        | 11.6317  | 31.84236631 | 2.59999586  | NM_031934.5    |
| ACOT8       | mRNA        | 2.15695  | 7.196898957 | 2.596461208 | NM_183386.1    |
| MEPCE       | mRNA        | 13.17915 | 35.78887059 | 2.594574603 | NM_019606.5    |
| HMG2P3      | ncRNA       | 1.623039 | 5.800148035 | 2.592469758 | HMG2P3         |
| PGLS        | mRNA        | 2.911208 | 9.137006541 | 2.591784319 | NM_012088.2    |
| UROD        | mRNA        | 5.748261 | 16.47320955 | 2.589290554 | NR_036510.1    |
| SH3GL1      | mRNA        | 13.84535 | 37.4271725  | 2.588499054 | NM_003025.3    |
| SHMT2       | mRNA        | 33.18725 | 87.43914127 | 2.586904439 | NR_029415.1    |
| ZNF768      | mRNA        | 6.737787 | 18.99100355 | 2.583555586 | NM_024671.3    |
| AK2P1       | ncRNA       | 0        | 1.582613449 | 2.582613449 | AK2P1          |
| BCAP31      | mRNA        | 12.88354 | 34.85111774 | 2.582275779 | NM_005745.7    |
| MIR3960     | miRNA       | 0        | 1.58043953  | 2.58043953  | NR_039767.1    |
| HNF1B       | mRNA        | 12.30854 | 33.32181027 | 2.578931803 | NM_006481.1    |
| TXN         | mRNA        | 71.75354 | 186.5683374 | 2.578133414 | NM_003329.3    |
| PTRHD1      | mRNA        | 1.436474 | 5.280104792 | 2.577537967 | NM_001013663.1 |
| DNLZ        | mRNA        | 0.876441 | 3.835199925 | 2.576793217 | NR_073565.1    |
| RN7SL12P    | ncRNA       | 1.699993 | 5.951172298 | 2.574514998 | RN7SL12P       |
| HIST1H2BD   | mRNA        | 60.30883 | 156.7809741 | 2.573543892 | NM_138720.2    |
| RN7SKP255   | ncRNA       | 6.847194 | 19.17599963 | 2.571110166 | RN7SKP255      |
| TRMT2A      | mRNA        | 5.75653  | 16.3496626  | 2.567836101 | NM_182984.4    |
| HSD17B10    | mRNA        | 18.77112 | 49.73214856 | 2.56597202  | NM_004493.2    |
| LOC10537848 | lncRNA      | 0.197278 | 2.071836694 | 2.565683542 | XR_959871.1    |
| ATP5I       | mRNA        | 45.02264 | 117.0261347 | 2.564523131 | NR_033743.1    |
| MCAT        | mRNA        | 1.596237 | 5.657804649 | 2.564405092 | NR_046423.1    |
| PTGES2      | mRNA        | 5.357907 | 15.30131244 | 2.563943172 | NR_027812.1    |
| SNORD96A    | snoRNA      | 25.10638 | 65.91749871 | 2.56326255  | NR_002592.1    |
| HOXC-AS3    | lncRNA      | 0        | 1.563260839 | 2.563260839 | NR_047506.1    |

|           |              |          |             |             |                |
|-----------|--------------|----------|-------------|-------------|----------------|
| MIR191    | miRNA        | 0        | 1.563260839 | 2.563260839 | NR_029690.1    |
| RNA5SP82  | ncRNA        | 0        | 1.563260839 | 2.563260839 | RNA5SP82       |
| MYL9      | mRNA         | 17.16089 | 45.53699159 | 2.562484565 | NM_181526.2    |
| EIF3I     | mRNA         | 23.29259 | 61.23029583 | 2.561698651 | NM_003757.2    |
| SNORD126  | snoRNA       | 1.659926 | 5.810908977 | 2.560563564 | NR_003693.1    |
| HIST1H2BK | mRNA         | 84.22293 | 217.1870518 | 2.560191817 | NM_080593.2    |
| CBX8      | mRNA         | 2.444794 | 7.814281866 | 2.558725664 | NM_020649.2    |
| ETHE1     | mRNA         | 1.226363 | 4.69561558  | 2.558260008 | NM_014297.3    |
| LDHA      | mRNA         | 189.0004 | 485.0571185 | 2.558190365 | NR_028500.1    |
| TRIP13    | mRNA         | 10.52004 | 28.46312078 | 2.557553701 | NM_004237.3    |
| CHID1     | mRNA         | 4.319654 | 12.60152604 | 2.556844036 | NM_023947.3    |
| JUND      | mRNA         | 25.70052 | 67.25764515 | 2.556416186 | NM_005354.5    |
| PSMB6     | mRNA         | 26.94905 | 70.42561789 | 2.555565418 | NM_002798.2    |
| GMIP      | mRNA         | 3.685622 | 10.96692998 | 2.553968539 | NM_016573.3    |
| SGSM3     | mRNA         | 2.505707 | 7.949389934 | 2.552805658 | NM_015705.5    |
| IER3      | mRNA         | 2.981842 | 9.162725628 | 2.552267143 | NM_052815.1    |
| TOMM5     | mRNA         | 46.56394 | 120.3521255 | 2.551347358 | NM_001134485.1 |
| ALAS1     | mRNA         | 19.30171 | 50.79450146 | 2.551237839 | NM_199166.2    |
| STX5      | mRNA         | 9.217376 | 25.04557643 | 2.549145291 | NM_003164.4    |
| UCP2      | mRNA         | 11.88067 | 31.80466524 | 2.546813272 | NM_003355.2    |
| ATP5G1    | mRNA         | 13.96955 | 37.12200855 | 2.546637724 | NM_005175.2    |
| MIR222    | Precursor_m  | 2.987866 | 9.15218164  | 2.545767765 | NR_029636.1    |
| CDT1      | mRNA         | 9.153482 | 24.83919204 | 2.544860133 | NM_030928.3    |
| PCIF1     | mRNA         | 6.037414 | 16.90815922 | 2.544707484 | NM_022104.3    |
| TGFB1I1   | mRNA         | 0.364374 | 2.471407934 | 2.544322942 | NM_015927.4    |
| R3HCC1    | mRNA         | 3.309405 | 9.956072808 | 2.542363133 | NR_125897.1    |
| SNAI1     | mRNA         | 3.365502 | 10.09853696 | 2.542327826 | NM_005985.3    |
| TBX2      | mRNA         | 9.723825 | 26.25353203 | 2.541400191 | NM_005994.3    |
| RPL12P4   | ncRNA        | 1.846434 | 6.232969381 | 2.541063202 | RPL12P4        |
| CD2BP2    | mRNA         | 4.416029 | 12.74562582 | 2.537952819 | NM_006110.2    |
| RPL7A     | mRNA         | 221.7568 | 564.2914946 | 2.537707521 | NM_000972.2    |
| YIPF2     | mRNA         | 9.79617  | 26.38472222 | 2.536521956 | NM_024029      |
| C19orf48  | mRNA         | 17.9715  | 47.11804357 | 2.536332587 | NM_199250.2    |
| PLA2G15   | mRNA         | 1.645677 | 5.709592163 | 2.536058247 | NM_012320.3    |
| RPL31     | mRNA         | 93.44691 | 238.3412    | 2.534134786 | NM_001099693.1 |
| PTMS      | mRNA         | 54.14104 | 138.7081449 | 2.533651019 | NM_002824.4    |
| CYB5R2    | mRNA         | 1.83407  | 6.179765504 | 2.533376425 | NR_126508.1    |
| APOA1-AS  | antisense_R1 | 0        | 1.532717554 | 2.532717554 | NR_126362.1    |
| F12       | mRNA         | 6.489978 | 17.95120394 | 2.530208262 | NM_000505.3    |
| GRINA     | mRNA         | 15.94895 | 41.87441991 | 2.52962081  | NM_001009184.1 |
| TMPRSS6   | mRNA         | 1.389161 | 5.043155819 | 2.52940458  | NM_153609.3    |
| DNM1P38   | ncRNA        | 0        | 1.528748948 | 2.528748948 | DNM1P42        |
| LOC388022 | miscRNA      | 0.826385 | 3.616163723 | 2.527486033 | NM_001013637.1 |
| NR2C2AP   | mRNA         | 8.814778 | 23.80468919 | 2.527279657 | NM_176880.5    |
| LRG1      | mRNA         | 3.138938 | 9.453336894 | 2.525608318 | NM_052972.2    |
| TMUB1     | mRNA         | 9.505337 | 25.51645111 | 2.524093379 | NM_031434.3    |

|              |         |          |             |             |                |
|--------------|---------|----------|-------------|-------------|----------------|
| SFN          | mRNA    | 3.124195 | 9.405718448 | 2.523090877 | NM_006142.3    |
| DUS3L        | mRNA    | 5.708638 | 15.92078709 | 2.522238925 | NM_020175.2    |
| MPP1         | mRNA    | 3.88953  | 11.32492468 | 2.520676676 | NM_002436.3    |
| ACTG1        | mRNA    | 252.0028 | 636.7024009 | 2.520535426 | NR_037688.1    |
| URB1-AS1     | lncRNA  | 1.190816 | 4.516086868 | 2.517822629 | NR_026845.1    |
| ATPIF1       | mRNA    | 26.29322 | 67.68878829 | 2.516697488 | NM_178191.2    |
| HRAS         | mRNA    | 0.722486 | 3.333956769 | 2.516106137 | NM_176795.3    |
| PIK3R2       | mRNA    | 25.86756 | 66.59062884 | 2.515697014 | NR_073517.1    |
| FAM234A      | mRNA    | 9.014027 | 24.18672647 | 2.515144599 | NR_104317.1    |
| UCK2         | mRNA    | 5.803748 | 16.10783969 | 2.514472776 | NM_012474.4    |
| TNFRSF1A     | mRNA    | 43.26098 | 110.2878415 | 2.514355786 | NM_001065.3    |
| RNU6-1337P   | ncRNA   | 0        | 1.513894707 | 2.513894707 | RNU6-1337P     |
| RFNG         | mRNA    | 1.528258 | 5.349978014 | 2.511602377 | NM_002917.1    |
| YIPF3        | mRNA    | 17.3988  | 45.17905671 | 2.509894626 | NM_015388.3    |
| PAQR4        | mRNA    | 0.588373 | 2.986595001 | 2.509860317 | NM_152341.4    |
| CAMK2G       | mRNA    | 5.439582 | 15.15872793 | 2.509281921 | NM_172173.2    |
| REXO1        | mRNA    | 8.654302 | 23.21355935 | 2.508058937 | NM_020695.3    |
| ECHS1        | mRNA    | 11.87053 | 31.27462693 | 2.507637748 | NM_004092.3    |
| CDK5         | mRNA    | 3.581432 | 10.48813056 | 2.507541191 | NM_004935.3    |
| RPS15P4      | ncRNA   | 7.887967 | 21.28535958 | 2.507362941 | RPS15P4        |
| TARS2        | mRNA    | 5.715406 | 15.83102873 | 2.506330814 | NR_073513.1    |
| GLTPD2       | mRNA    | 3.83004  | 11.10336468 | 2.505851897 | NM_001014985.2 |
| NEU4         | mRNA    | 3.048001 | 9.137734628 | 2.504380461 | NM_080741.3    |
| TST          | mRNA    | 5.058613 | 14.16696542 | 2.503372625 | NM_003312.5    |
| SAP30BP      | mRNA    | 6.497407 | 17.76363156 | 2.502682774 | NR_126036.1    |
| JMJD7        | mRNA    | 1.502338 | 5.259240404 | 2.501357023 | NM_001114632.1 |
| KLHDC3       | mRNA    | 5.778909 | 15.95625526 | 2.501324943 | NR_040101.1    |
| TSTA3        | mRNA    | 14.47551 | 37.69433861 | 2.500359283 | NM_003313.3    |
| RPS10        | mRNA    | 14.86426 | 38.66517512 | 2.500285271 | NM_001204091.1 |
| RBM10        | mRNA    | 11.86053 | 31.14015591 | 2.499131446 | NM_152856.2    |
| GSN          | mRNA    | 23.66519 | 60.62414819 | 2.498426338 | NM_198252.2    |
| MIR615       | miRNA   | 0        | 1.498124971 | 2.498124971 | NR_030753.1    |
| MIR621       | miRNA   | 0        | 1.498124971 | 2.498124971 | NR_030352.1    |
| MIR92B       | miRNA   | 0        | 1.498124971 | 2.498124971 | NR_030281.1    |
| RPS21P8      | ncRNA   | 0        | 1.498124971 | 2.498124971 | RPS21P8        |
| LOC441259    | ncRNA   | 0.210144 | 2.023043439 | 2.498085603 | LOC441259      |
| LOC107985811 | lncRNA  | 1.493933 | 5.22981808  | 2.49798917  |                |
| SIRT6        | mRNA    | 2.80397  | 8.501242978 | 2.49771787  | NM_016539.2    |
| NECTIN2      | mRNA    | 20.19634 | 51.91821327 | 2.496572606 |                |
| NSUN5P2      | miscRNA | 5.208052 | 14.48780956 | 2.49479367  | NR_033323.3    |
| RBX1         | mRNA    | 14.87337 | 38.57423766 | 2.493120643 | NM_014248.3    |
| TMEM150A     | mRNA    | 2.659325 | 8.115983244 | 2.491165212 | NR_033179.1    |
| SNORD76      | snoRNA  | 50.71995 | 127.8399975 | 2.491108136 | NR_003942.1    |
| HTRA3        | mRNA    | 17.39688 | 44.82701211 | 2.4910203   | NM_053044.4    |
| EDC4         | mRNA    | 7.070642 | 19.10226111 | 2.490788362 | NM_014329.4    |
| LOC10537423  | lncRNA  | 0        | 1.490362665 | 2.490362665 | XR_942619.1    |

|            |             |          |             |             |                |
|------------|-------------|----------|-------------|-------------|----------------|
| RBM22      | mRNA        | 17.7922  | 45.79434693 | 2.490094588 | NM_018047.2    |
| TRABD      | mRNA        | 3.110824 | 9.232888709 | 2.489254986 | NM_025204.2    |
| PHGDH      | mRNA        | 12.7128  | 33.12637173 | 2.488651458 | NM_006623.3    |
| RARS       | mRNA        | 50.1445  | 126.279334  | 2.488622336 | NM_002887.3    |
| FBL        | mRNA        | 35.82875 | 90.61277076 | 2.487534118 | NM_001436.3    |
| AFG3L2     | mRNA        | 29.9066  | 75.83154729 | 2.485927162 | NM_006796.2    |
| NOA1       | mRNA        | 6.564649 | 17.80388025 | 2.485757033 | NM_032313.2    |
| DCTPP1     | mRNA        | 4.395438 | 12.40897301 | 2.485242915 | NM_024096.1    |
| ETV4       | mRNA        | 20.69374 | 52.91155452 | 2.485120212 | NM_001986.2    |
| MIR634     | Precursor_m | 0        | 1.482680383 | 2.482680383 | NR_030364.1    |
| MIR597     | Precursor_m | 0        | 1.482680383 | 2.482680383 | NR_030327.1    |
| BCKDHA     | mRNA        | 5.83594  | 15.9709918  | 2.482612874 | NM_001164783.1 |
| CCDC142    | mRNA        | 3.408605 | 9.943765651 | 2.482364568 | NM_032779.3    |
| ADAM15     | mRNA        | 2.631006 | 8.01302578  | 2.48223913  | NR_048577.1    |
| GNB1L      | mRNA        | 1.081848 | 4.165951202 | 2.481426214 | NM_053004.2    |
| RNASEK-C17 | lncRNA      | 3.443324 | 10.01993694 | 2.480110906 | NR_037717.1    |
| DACT2      | mRNA        | 2.48654  | 7.640739595 | 2.478313797 | NR_104425.1    |
| SEMA4B     | mRNA        | 3.834716 | 10.97315658 | 2.476496491 | NM_198925.2    |
| ZC3H12A    | mRNA        | 3.345343 | 9.759214095 | 2.476033197 | NM_025079.2    |
| HDHD3      | mRNA        | 7.630071 | 20.36684812 | 2.475860117 | NM_031219      |
| RRP7A      | mRNA        | 2.982389 | 8.858573613 | 2.475542557 | NM_015703.4    |
| UNC119     | mRNA        | 11.54609 | 30.05323987 | 2.475133739 | NM_054035.2    |
| NHP2       | mRNA        | 9.802298 | 25.73621002 | 2.47504827  | NM_017838.3    |
| PREB       | mRNA        | 11.12196 | 29.00237512 | 2.475043009 | NM_013388.4    |
| GLMP       | mRNA        | 12.87317 | 33.33267358 | 2.474753654 | NM_144580.2    |
| RNF157     | mRNA        | 8.002642 | 21.26770918 | 2.473463692 | NM_052916.2    |
| APRT       | mRNA        | 12.01441 | 31.18773173 | 2.473238468 | NM_001030018.1 |
| PLEKHG6    | mRNA        | 4.774672 | 13.27074687 | 2.47126557  | NM_018173.3    |
| CYB5R3     | mRNA        | 8.354139 | 22.11567371 | 2.471170775 | NM_007326.4    |
| SNORD26    | snoRNA      | 21.91102 | 55.61039891 | 2.470880777 | NR_002564.1    |
| PTMA       | mRNA        | 262.3962 | 649.6953765 | 2.470404952 | NM_002823.4    |
| MAZ        | mRNA        | 22.73189 | 57.61089225 | 2.46970985  | NR_074080.1    |
| CMTM3      | mRNA        | 5.85391  | 15.92513274 | 2.469412803 | NR_037613.1    |
| RPS11      | mRNA        | 111.9294 | 277.8442051 | 2.469191424 | NM_001015.4    |
| RPS26P25   | ncRNA       | 3.27211  | 9.545575035 | 2.468469755 | NM_001093731.2 |
| MIR6789    | miRNA       | 0        | 1.467550992 | 2.467550992 | NR_106847.1    |
| MIR345     | miRNA       | 0        | 1.467550992 | 2.467550992 | NR_029906.1    |
| MIR602     | Precursor_m | 0        | 1.467550992 | 2.467550992 | NR_030333.1    |
| MRPL38     | mRNA        | 9.286099 | 24.38091381 | 2.467496562 | NM_032478.3    |
| STARD10    | mRNA        | 7.852918 | 20.83509014 | 2.466428491 | NM_006645.2    |
| BCKDK      | mRNA        | 3.477548 | 10.03696514 | 2.464957303 | NM_005881.3    |
| UBE2S      | mRNA        | 41.11766 | 102.763071  | 2.463647742 | NM_014501.2    |
| SERINC2    | mRNA        | 1.754441 | 5.783508784 | 2.462753251 | NM_178865.4    |
| RN7SL612P  | ncRNA       | 0        | 1.462576243 | 2.462576243 | RN7SL612P      |
| DUS1L      | mRNA        | 4.628054 | 12.8582921  | 2.462359447 | NM_022156.4    |
| MRPS18B    | mRNA        | 3.213807 | 9.375488735 | 2.46226024  | NM_014046.3    |



|             |        |          |             |             |                |
|-------------|--------|----------|-------------|-------------|----------------|
| TUFT1       | mRNA   | 3.626446 | 10.39086437 | 2.462119801 | NM_020127.2    |
| TEN1        | mRNA   | 0.988963 | 3.894824397 | 2.460993451 | NM_001113324.2 |
| HIST2H2AC   | mRNA   | 30.83587 | 77.34027309 | 2.460754526 | NM_003517.2    |
| LOC10537225 | lncRNA | 0        | 1.460101494 | 2.460101494 | XR_936275.1    |
| EIF4EBP1    | mRNA   | 18.93939 | 48.05161722 | 2.460036525 | NM_004095.3    |
| RPL24       | mRNA   | 152.0516 | 375.416256  | 2.459408126 | NM_000986.3    |
| SNORA80B    | snoRNA | 2.416657 | 7.402499856 | 2.459275483 | NR_028374.1    |
| PCYT2       | mRNA   | 5.545155 | 15.09520105 | 2.45910171  | NM_002861.4    |
| FZR1        | mRNA   | 5.394458 | 14.71872527 | 2.458179369 | NM_016263.3    |
| APBA3       | mRNA   | 2.787853 | 8.308720608 | 2.457518775 | NM_004886.3    |
| CDK2AP2     | mRNA   | 17.18729 | 43.67003963 | 2.456113288 | NR_073484.1    |
| EIF5AL1     | mRNA   | 1.069874 | 4.082390545 | 2.455410565 | NM_001099692.1 |
| FBRS        | mRNA   | 5.994903 | 16.16162388 | 2.453446919 | NM_022452.1    |
| RHOF        | mRNA   | 8.435968 | 22.1488702  | 2.453258747 | NM_019034.2    |
| HIST1H4J    | mRNA   | 1.384826 | 4.847865074 | 2.452114244 | NM_021968.3    |
| MYL6        | mRNA   | 97.09642 | 239.462962  | 2.451291832 | NM_079425.1    |
| SNORA81     | snoRNA | 17.54113 | 44.43876318 | 2.450701443 | NR_002989.1    |
| MRPS36      | mRNA   | 5.811614 | 15.69142182 | 2.450435778 | NM_033281.5    |
| CNN1        | mRNA   | 4.392539 | 12.21113184 | 2.449890652 | NM_001308342.1 |
| AP1M2       | mRNA   | 10.56892 | 27.33971489 | 2.449642581 | NM_005498.4    |
| GSTP1       | mRNA   | 170.1649 | 417.9487184 | 2.447631968 | NM_000852.3    |
| RPS8        | mRNA   | 160.37   | 393.7199923 | 2.446055317 | NM_001012.1    |
| RRP12       | mRNA   | 6.014887 | 16.14969241 | 2.444756803 | NM_015179.3    |
| DPH1        | mRNA   | 4.716609 | 12.97328448 | 2.444330943 | NM_001383.3    |
| PGF         | mRNA   | 5.41756  | 14.67550992 | 2.442596592 | NM_002632.5    |
| SSBP4       | mRNA   | 3.070535 | 8.940301658 | 2.442013796 | NM_032627.4    |
| S100A6      | mRNA   | 30.79733 | 76.64784623 | 2.441960887 | NM_014624.3    |
| TARBP2      | mRNA   | 6.58384  | 17.51653812 | 2.441578114 | NM_134324.2    |
| LAMTOR1     | mRNA   | 7.108537 | 18.78564849 | 2.4401009   | NM_017907.2    |
| SLC39A13    | mRNA   | 1.552561 | 5.22601734  | 2.439125423 | NM_152264.4    |
| DENND4B     | mRNA   | 4.920139 | 13.43468237 | 2.438233601 | NM_014856.2    |
| LOC10537195 | lncRNA | 0        | 1.438199972 | 2.438199972 | XR_935092.1    |
| BCYRN1      | lncRNA | 0        | 1.438199972 | 2.438199972 | NR_001568.1    |
| RNU5D-1     | snRNA  | 0        | 1.438199972 | 2.438199972 | NR_002755.3    |
| HSPBP1      | mRNA   | 2.842231 | 8.366886629 | 2.437876778 | NM_012267.4    |
| ID1         | mRNA   | 73.30329 | 180.0957629 | 2.437250908 | NM_181353.2    |
| SOCS1       | mRNA   | 1.35142  | 4.73092096  | 2.437217256 | NM_003745.1    |
| TBRG4       | mRNA   | 6.859227 | 18.13547416 | 2.434777998 | NM_199122.2    |
| CIB2        | mRNA   | 2.878934 | 8.443977108 | 2.434683794 | NR_125435.1    |
| INO80B-WBF  | lncRNA | 2.489889 | 7.490624854 | 2.43292143  | NR_037849.1    |
| MVK         | mRNA   | 6.731231 | 17.78632498 | 2.429926733 | NM_001301182.1 |
| UNC93B1     | mRNA   | 6.652571 | 17.59038725 | 2.429299649 | NM_030930.3    |
| PEPD        | mRNA   | 9.810904 | 25.25793981 | 2.428838388 | NM_001166057.1 |
| PET100      | mRNA   | 3.830598 | 10.72783196 | 2.42782202  | NR_033242.1    |
| RPL39P3     | ncRNA  | 3.423597 | 9.73781231  | 2.427393954 | RPL39P3        |
| NOL7        | mRNA   | 17.49254 | 43.88593646 | 2.427246237 | NM_016167.3    |

|             |         |          |             |             |                |
|-------------|---------|----------|-------------|-------------|----------------|
| HIST1H2BG   | mRNA    | 25.11151 | 62.37586395 | 2.427124034 | NM_003518.3    |
| CUEDC2      | mRNA    | 2.335832 | 7.094799193 | 2.426620776 | NM_024040.2    |
| UBAC1       | mRNA    | 9.066022 | 23.41793205 | 2.425777751 | NM_016172.2    |
| SNRPA       | mRNA    | 26.5313  | 65.68574457 | 2.422179326 | NM_004596.4    |
| TRAPPC1     | mRNA    | 30.29821 | 74.80747107 | 2.422102811 | NR_030684.1    |
| CCDC86      | mRNA    | 55.62028 | 136.0401562 | 2.42033689  | NM_024098.3    |
| FDX1L       | mRNA    | 5.244659 | 14.10999972 | 2.41966769  | NM_080665.3    |
| POR         | mRNA    | 11.63941 | 29.58122391 | 2.419514063 | NM_000941.2    |
| SEC11A      | mRNA    | 52.0795  | 127.4153831 | 2.419302881 | NR_073518.1    |
| LOC10050750 | mRNA    | 0.974029 | 3.775122704 | 2.418972612 | XP_011547431.1 |
| GAL         | mRNA    | 2.611644 | 7.736038969 | 2.418854123 | NM_015973      |
| AKR1B10     | mRNA    | 0.558322 | 2.768901418 | 2.418564615 | NM_020299.4    |
| RPL7AP62    | ncRNA   | 1.310169 | 4.586514717 | 2.418227521 | RPL7AP62       |
| PTOV1       | mRNA    | 14.08075 | 35.46658238 | 2.418088192 | NR_130963.1    |
| LOC10272334 | lncRNA  | 1.755099 | 5.659021812 | 2.416981335 | XR_433035      |
| TUBA1B      | mRNA    | 66.27677 | 161.5411149 | 2.416006401 | NM_006082.2    |
| IL27RA      | mRNA    | 2.8895   | 8.39353519  | 2.415100717 | NM_004843.3    |
| SSR2        | mRNA    | 79.66343 | 193.7627116 | 2.41451053  | NM_003145.3    |
| CDC20       | mRNA    | 26.29322 | 64.82632709 | 2.411819398 | NM_001255.2    |
| PPT2        | mRNA    | 3.834278 | 10.65918178 | 2.411773062 | NM_138934.1    |
| NDUFS8      | mRNA    | 21.8518  | 54.10741516 | 2.411512996 | NM_002496.3    |
| DCPS        | mRNA    | 2.263535 | 6.867437882 | 2.410710344 | NM_014026      |
| UBE2L6      | mRNA    | 2.840317 | 8.256333172 | 2.410304198 | NM_198183.2    |
| RNU6-1238P  | ncRNA   | 0        | 1.409999972 | 2.409999972 | RNU6-1238P     |
| RNU6-986P   | ncRNA   | 0        | 1.409999972 | 2.409999972 | RNU6-986P      |
| MYDGF       | mRNA    | 13.44682 | 33.79975196 | 2.408817426 | NM_019107.3    |
| LOC10013041 | lncRNA  | 0.327356 | 2.19645414  | 2.408136504 | NR_026874.2    |
| TPI1        | mRNA    | 85.25916 | 206.7074113 | 2.407946129 | NM_001258026.1 |
| NR1H2       | mRNA    | 5.503964 | 14.6572533  | 2.407339962 | NM_007121.5    |
| HIST2H2BE   | mRNA    | 27.49966 | 67.60769099 | 2.40731606  | NM_003528.2    |
| TMEM54      | mRNA    | 1.168588 | 4.218719918 | 2.406506242 | NM_033504.2    |
| E2F4        | mRNA    | 7.355842 | 19.10751391 | 2.406401758 | NM_001950.3    |
| PI4KAP2     | miscRNA | 11.86204 | 29.94139906 | 2.405637003 | NR_003700.1    |
| NECAP2      | mRNA    | 6.080693 | 16.03239313 | 2.405469826 | NM_018090.4    |
| FLOT1       | mRNA    | 6.243115 | 16.42182745 | 2.405295015 | NM_005803.2    |
| COX7C       | mRNA    | 35.12762 | 85.86795901 | 2.404475126 | NM_001867.2    |
| PSMC4       | mRNA    | 28.67665 | 70.33203624 | 2.40364192  | NM_153001.2    |
| DAXX        | mRNA    | 2.167231 | 6.610991843 | 2.403042823 | NM_001350.4    |
| MIR3142HG   | lncRNA  | 0.992518 | 3.784736768 | 2.401351646 |                |
| TALDO1      | mRNA    | 23.26834 | 57.27345021 | 2.401212882 | NM_006755.1    |
| USP2-AS1    | lncRNA  | 0.142156 | 1.741764672 | 2.400516234 | NR_034160.1    |
| CIDEB       | mRNA    | 5.871998 | 15.48998956 | 2.399591769 | NM_014430.2    |
| SUV39H1     | mRNA    | 12.06061 | 30.31594445 | 2.397740411 | NM_003173.3    |
| ABCA7       | mRNA    | 1.056802 | 3.930771627 | 2.397300551 | NM_033308.1    |
| PDK2        | mRNA    | 0.97563  | 3.735584343 | 2.396999814 | NM_002611.4    |
| PIN1        | mRNA    | 14.1497  | 35.31130366 | 2.396833242 | NR_038422.2    |

|            |         |          |             |             |                |
|------------|---------|----------|-------------|-------------|----------------|
| TSSC1      | mRNA    | 6.099491 | 16.01438376 | 2.396564056 | NM_003310.2    |
| CDK5RAP3   | mRNA    | 2.869211 | 8.271742392 | 2.396287651 | NM_176096.2    |
| BSG        | mRNA    | 65.1664  | 157.5269797 | 2.39588356  | NM_198591.2    |
| NDUFA13    | mRNA    | 23.34615 | 57.31571844 | 2.395274617 | NM_015965.6    |
| ISYNA1     | mRNA    | 2.172994 | 6.596702351 | 2.394175035 | NR_045573.1    |
| HMOX1      | mRNA    | 6.40794  | 16.73377326 | 2.39388733  | NM_002133.2    |
| PPDPF      | mRNA    | 13.95876 | 34.79814604 | 2.393122894 | NM_024299.2    |
| WDR5       | mRNA    | 20.47743 | 50.3953894  | 2.392995438 | NM_052821.3    |
| RPL38      | mRNA    | 67.49377 | 162.8981601 | 2.392891606 | NM_001035258.1 |
| ECSIT      | mRNA    | 4.161545 | 11.34975243 | 2.392646323 | NM_016581.4    |
| SLC52A2    | mRNA    | 4.802415 | 12.87156139 | 2.390652956 | NR_045600.1    |
| RPL7AP6    | ncRNA   | 34.32146 | 83.4188633  | 2.390016144 | RPL7AP6        |
| PLIN3      | mRNA    | 10.04255 | 25.38361489 | 2.389268139 | NM_005817.4    |
| HIST1H2AE  | mRNA    | 31.75932 | 77.26499849 | 2.389090751 | NM_021052.2    |
| FTL        | mRNA    | 572.9946 | 1370.005186 | 2.388533431 | NM_000146.3    |
| SLC2A6     | mRNA    | 4.372153 | 11.83106399 | 2.388439758 | NM_017585.3    |
| CLTB       | mRNA    | 6.851051 | 17.74455177 | 2.387521236 | NR_045724.1    |
| LRRC45     | mRNA    | 1.512442 | 4.989153885 | 2.383797784 | NM_144999      |
| RNU6-230P  | ncRNA   | 0        | 1.382884588 | 2.382884588 | RNU6-230P      |
| RNU6-23P   | ncRNA   | 0        | 1.382884588 | 2.382884588 | NR_046488.1    |
| STX18-AS1  | lncRNA  | 1.392088 | 4.699241538 | 2.38253861  | NR_037888.1    |
| MIR548AT   | miRNA   | 5.666643 | 14.87793074 | 2.381698029 | NR_049845.1    |
| VPS25      | mRNA    | 7.648611 | 19.5894452  | 2.380665053 | NM_032353.3    |
| ANKZF1     | mRNA    | 2.775348 | 7.987404846 | 2.380549775 | NM_018089.2    |
| HMGN2P4    | ncRNA   | 0.272751 | 2.028995811 | 2.379880377 | HMGN2P4        |
| HEXDC      | mRNA    | 1.500755 | 4.950600536 | 2.379521794 | NM_173620.2    |
| NELFE      | mRNA    | 3.526678 | 9.766124089 | 2.378372169 | NM_002904.5    |
| ZNF511     | mRNA    | 3.997281 | 10.88367546 | 2.378028418 | NR_130127.1    |
| POP7       | mRNA    | 13.04787 | 32.40579336 | 2.377996816 | NM_005837.2    |
| ZNF319     | mRNA    | 1.284761 | 4.429424221 | 2.376363876 | NM_020807      |
| ARRDC1-AS1 | lncRNA  | 2.424761 | 7.137947547 | 2.376209057 | NR_122035.1    |
| SMA4       | miscRNA | 13.44771 | 33.30880017 | 2.374688541 | NR_024054.2    |
| SNAPC4     | mRNA    | 4.35952  | 11.72521491 | 2.374319744 | NM_003086.2    |
| UBXN6      | mRNA    | 6.934754 | 17.83956487 | 2.374309954 | NM_025241.2    |
| MMP11      | mRNA    | 1.721512 | 5.461518881 | 2.374238764 | NM_005940.3    |
| BABAM1     | mRNA    | 20.73356 | 50.59622064 | 2.37403462  | NM_014173.3    |
| NFKB2      | mRNA    | 3.271259 | 9.136106379 | 2.373095791 | NM_002502.5    |
| ARL2       | mRNA    | 3.6891   | 10.12610184 | 2.372758336 | NM_001667.3    |
| PSMA7      | mRNA    | 50.00044 | 119.9893581 | 2.372319977 | NM_152255.1    |
| ISCU       | mRNA    | 4.563447 | 12.19389636 | 2.371532551 | NM_213595.3    |
| MUL1       | mRNA    | 2.145062 | 6.456103026 | 2.370733502 | NM_024544.2    |
| ARID5A     | mRNA    | 1.368768 | 4.615487416 | 2.370636518 | NM_212481.1    |
| UNC45A     | mRNA    | 5.494522 | 14.39215889 | 2.370021708 | NM_018671.3    |
| SNORD141B  | snoRNA  | 0        | 1.369714259 | 2.369714259 |                |
| NUBP2      | mRNA    | 3.81344  | 10.40036677 | 2.368444863 | NR_104318.1    |
| MRPL4      | mRNA    | 4.374912 | 11.72575684 | 2.36762122  | NM_146388.1    |

|             |        |          |             |             |                |
|-------------|--------|----------|-------------|-------------|----------------|
| CD9         | mRNA   | 9.759004 | 24.44449099 | 2.364948604 | NM_001769.3    |
| SNORA5C     | snoRNA | 1.199508 | 4.199124006 | 2.363766385 | NR_002991.1    |
| FAM131A     | mRNA   | 2.888537 | 8.188452267 | 2.36295855  | NM_144635.4    |
| SHF         | mRNA   | 2.760789 | 7.881335846 | 2.361562156 | NM_138356.2    |
| CAPZB       | mRNA   | 32.68417 | 78.50865404 | 2.360415869 | NM_004930.4    |
| NR2F2       | mRNA   | 31.93392 | 76.72276171 | 2.359960982 | NM_021005.3    |
| PLXNB2      | mRNA   | 14.42658 | 35.39942499 | 2.359526925 | NM_012401.3    |
| SLC2A4RG    | mRNA   | 8.869204 | 22.27663844 | 2.358512237 | NM_020062.3    |
| TXNDC5      | mRNA   | 19.83588 | 48.1180492  | 2.357378012 | NM_030810.3    |
| MIR143      | miRNA  | 0        | 1.356792426 | 2.356792426 | NR_029684.1    |
| RNU6-301P   | ncRNA  | 0        | 1.356792426 | 2.356792426 | RNU6-301P      |
| MTND4P7     | ncRNA  | 0        | 1.356792426 | 2.356792426 | MTND4P7        |
| ATP5E       | mRNA   | 26.95205 | 64.86642242 | 2.356407414 | NM_006886.3    |
| GGA3        | mRNA   | 7.754768 | 19.62845208 | 2.356253515 | NR_033345.1    |
| SF3A2       | mRNA   | 26.39282 | 63.54228967 | 2.356175477 | NM_007165.4    |
| TMED9       | mRNA   | 36.9221  | 88.32312238 | 2.355437105 | NM_017510.4    |
| IER5L       | mRNA   | 3.031968 | 8.491217546 | 2.353991456 | NM_203434.2    |
| RPS12P22    | ncRNA  | 0.940836 | 3.568053365 | 2.353652692 | RPS12P22       |
| ZBTB7A      | mRNA   | 6.769025 | 17.28413727 | 2.353466256 | NM_015898.2    |
| C16orf58    | mRNA   | 6.835023 | 17.43427623 | 2.352804317 | NM_022744.3    |
| AAMP        | mRNA   | 10.38833 | 25.78571067 | 2.352031272 | NM_001302545.1 |
| RPS15       | mRNA   | 77.17859 | 182.876546  | 2.35200634  | NM_001308226.1 |
| TFF1        | mRNA   | 0.668019 | 2.923170675 | 2.351994134 | NM_003225.2    |
| RPS20       | mRNA   | 69.10731 | 163.8383778 | 2.351229406 | NM_001146227.1 |
| KEAP1       | mRNA   | 8.933077 | 22.3521776  | 2.350950961 | NM_203500.1    |
| RNF167      | mRNA   | 15.90056 | 38.70990101 | 2.349620981 | NM_015528.1    |
| RPL17P6     | ncRNA  | 6.521137 | 16.66485682 | 2.348695023 | NM_001093734.1 |
| SMG5        | mRNA   | 21.52633 | 51.86107973 | 2.346634897 | NM_015327.2    |
| LOC10798394 | mRNA   | 0        | 1.346629187 | 2.346629187 |                |
| CLTA        | mRNA   | 31.51039 | 75.28441601 | 2.346462887 | NR_132349.1    |
| RNU4-32P    | ncRNA  | 1.16548  | 4.07999992  | 2.34590041  | RNU4-32P       |
| HIST1H4H    | mRNA   | 26.80292 | 64.21908966 | 2.345764126 | NM_003543.3    |
| NME3        | mRNA   | 0.929308 | 3.524335464 | 2.345055956 | NM_002513.2    |
| RPSA        | mRNA   | 57.08689 | 135.2101997 | 2.344938749 | NM_002295      |
| FKBP11      | mRNA   | 32.3332  | 77.16103298 | 2.344840447 | NM_016594.2    |
| LSM2        | mRNA   | 1.680675 | 5.284295351 | 2.344296026 | NM_021177.4    |
| RNU6-768P   | ncRNA  | 0        | 1.344112123 | 2.344112123 | RNU6-768P      |
| RNU6-481P   | ncRNA  | 0        | 1.344112123 | 2.344112123 | RNU6-481P      |
| SNORD90     | snoRNA | 0        | 1.344112123 | 2.344112123 | NR_003071.1    |
| RPLP0       | mRNA   | 38.61297 | 91.82178618 | 2.343216897 | NM_053275.3    |
| SULT1A1     | mRNA   | 7.144898 | 18.07282043 | 2.341689342 | NM_177536.3    |
| ARPC1B      | mRNA   | 9.889417 | 24.49175368 | 2.340965918 | NM_005720.3    |
| HEIH        | lncRNA | 1.973966 | 5.960107992 | 2.3403457   | NR_045680.1    |
| ARL6IP4     | mRNA   | 5.237694 | 13.58800201 | 2.33868509  | NR_103512.1    |
| BLOC1S5-TX  | lncRNA | 16.32541 | 39.51617465 | 2.338540672 | NR_037616.1    |
| LSM10       | mRNA   | 3.545472 | 9.619028938 | 2.336177142 | NM_032881      |

|             |         |          |             |             |                |
|-------------|---------|----------|-------------|-------------|----------------|
| CCDC124     | mRNA    | 15.50899 | 37.56594779 | 2.336057123 | NM_138442.3    |
| MRPL24      | mRNA    | 12.53944 | 30.61228856 | 2.334829987 | NM_145729.2    |
| ATP6V0E2    | mRNA    | 1.583505 | 5.030106968 | 2.334079678 | NR_110612.1    |
| EPAS1       | mRNA    | 42.68959 | 100.8911479 | 2.332160828 | NM_001430.4    |
| CNDP2       | mRNA    | 8.746268 | 21.71616752 | 2.330755574 | NM_018235.2    |
| LRRC41      | mRNA    | 8.473054 | 21.07538629 | 2.330334715 | NM_006369.4    |
| RPL13AP5    | miscRNA | 5.244659 | 13.55142831 | 2.330219825 | NR_026712.1    |
| CHTF18      | mRNA    | 3.574701 | 9.65752188  | 2.329665029 | NM_022092.2    |
| GPRIN1      | mRNA    | 1.718307 | 5.331729934 | 2.329291548 | NM_052899.2    |
| C16orf91    | mRNA    | 1.008176 | 3.676380296 | 2.328670813 | NM_001272051.1 |
| NARR        | mRNA    | 2.742142 | 7.713825833 | 2.32856635  | NM_001256281.1 |
| GRN         | mRNA    | 7.697723 | 19.2481803  | 2.327986212 | NM_002087      |
| LOC283278   | mRNA    | 1.805853 | 5.531538354 | 2.327826034 | XP_005276455.1 |
| GATA6-AS1   | lncRNA  | 2.02199  | 6.032718003 | 2.327181019 | NR_102763.1    |
| HIST1H3A    | mRNA    | 30.13349 | 71.45001993 | 2.32707655  | NM_003529.2    |
| RNH1        | mRNA    | 3.144737 | 8.644725052 | 2.326981374 | NM_203389.2    |
| DMAP1       | mRNA    | 6.038226 | 15.36573175 | 2.32526366  | NM_019100.4    |
| HDGFRP2     | mRNA    | 14.89565 | 35.9549993  | 2.3248499   | NM_032631.3    |
| LOC10012947 | miscRNA | 0.9499   | 3.53315022  | 2.324811986 | XR_252901      |
| RPL3        | mRNA    | 131.7855 | 307.52542   | 2.323488135 | NM_001033853.1 |
| WRAP73      | mRNA    | 2.701887 | 7.600587051 | 2.323297869 | NM_017818.3    |
| LOC728752   | lncRNA  | 0        | 1.322248913 | 2.322248913 | NR_036504.1    |
| EPS15L1     | mRNA    | 16.31802 | 39.21263318 | 2.322010381 | NR_047665.1    |
| RPLP2       | mRNA    | 29.33321 | 69.43034347 | 2.321888791 | NM_001004.3    |
| RPL6        | mRNA    | 97.23015 | 227.0211271 | 2.321294676 | NM_001024662.1 |
| SLC2A1      | mRNA    | 10.38833 | 25.43301858 | 2.321061669 | NM_006516.2    |
| SIN3B       | mRNA    | 10.65976 | 26.06021701 | 2.320821065 | NM_015260.3    |
| VAX2        | mRNA    | 0.935387 | 3.489940016 | 2.319918976 | NM_012476.2    |
| SLC17A9     | mRNA    | 23.46725 | 55.76140811 | 2.319893504 | NM_022082.3    |
| LRP10       | mRNA    | 6.01681  | 15.27697221 | 2.319710962 | NM_014045.3    |
| MIR3911     | miRNA   | 0        | 1.319449516 | 2.319449516 | NR_037473.1    |
| VTN         | mRNA    | 211.1449 | 490.5136138 | 2.316876545 | NM_000638.3    |
| TELO2       | mRNA    | 2.171415 | 6.347235605 | 2.316706184 | NM_016111.3    |
| FAM43B      | mRNA    | 0.827391 | 3.230658341 | 2.315135373 | NM_207334.2    |
| ACADVL      | mRNA    | 24.64643 | 58.33003688 | 2.313384191 | NM_001270448.1 |
| CC2D1A      | mRNA    | 4.334048 | 11.33965362 | 2.3133751   | NM_017721.4    |
| ARPC4       | mRNA    | 17.00855 | 40.64319555 | 2.312411911 | NM_005718.4    |
| PSMB7       | mRNA    | 58.44738 | 136.4518791 | 2.312160575 | NM_002799.3    |
| RPS19BP1    | mRNA    | 3.71282  | 9.88939077  | 2.310589061 | NR_130151.1    |
| POLR3H      | mRNA    | 4.248404 | 11.12225073 | 2.30970242  | NM_138338.4    |
| TUT1        | mRNA    | 4.30312  | 11.24706984 | 2.309408551 | NM_022830.2    |
| COPE        | mRNA    | 19.81772 | 47.07655351 | 2.309405358 | NM_199444.1    |
| MARS        | mRNA    | 33.54303 | 78.74329863 | 2.308520797 | NM_004990.3    |
| STRN4       | mRNA    | 15.35321 | 36.74976056 | 2.308400293 | NM_013403.2    |
| ILK         | mRNA    | 14.98234 | 35.88598778 | 2.307921124 | NM_004517.3    |
| COPS6       | mRNA    | 21.89565 | 51.83974653 | 2.307850436 | NM_006833.4    |

|            |             |          |             |             |                |
|------------|-------------|----------|-------------|-------------|----------------|
| PLEKHO1    | mRNA        | 3.47508  | 9.32667275  | 2.307595355 | NM_016274      |
| MIR218-1   | miRNA       | 0        | 1.30745452  | 2.30745452  | NR_029631.1    |
| MIR204     | miRNA       | 0        | 1.30745452  | 2.30745452  | NR_029621.1    |
| RNY1P11    | ncRNA       | 0        | 1.30745452  | 2.30745452  | RNY1P11        |
| MIR5006    | Precursor_m | 0        | 1.30745452  | 2.30745452  | NR_049803.1    |
| SNORD99    | snoRNA      | 4.108316 | 10.78649979 | 2.307315994 | NR_003077.1    |
| OSGIN1     | mRNA        | 4.574208 | 11.86144307 | 2.307313176 | NM_182981.2    |
| PPAN       | mRNA        | 9.034492 | 22.1389579  | 2.305942191 | NM_020230.5    |
| MAF1       | mRNA        | 7.643379 | 18.92930196 | 2.305730408 | NM_032272.4    |
| C18orf8    | mRNA        | 4.872397 | 12.53417765 | 2.304711092 | NR_075075.1    |
| NAA20      | mRNA        | 39.22689 | 91.71130256 | 2.304709673 | NM_181528.3    |
| SNORD25    | snoRNA      | 44.14907 | 103.0352219 | 2.304260564 | NR_002565.1    |
| HERPUD1    | mRNA        | 8.892089 | 21.775036   | 2.302348406 | NM_014685.3    |
| ORAI2      | mRNA        | 0.942431 | 3.47211352  | 2.302327821 | NM_032831.3    |
| HES4       | mRNA        | 1.223554 | 4.118556621 | 2.301971402 | NM_021170.3    |
| ATP5B      | mRNA        | 82.30007 | 190.7195188 | 2.301552809 | NM_001686.3    |
| TUSC2      | mRNA        | 4.781651 | 12.29814703 | 2.300060591 | NM_007275.2    |
| LOC728715  | mRNA        | 3.994196 | 10.4868748  | 2.300044688 | XR_247802.1    |
| LENG8      | mRNA        | 15.52888 | 36.98780062 | 2.298267728 | NM_052925.3    |
| HEXA       | mRNA        | 12.53586 | 30.10548748 | 2.298005975 | NM_000520.4    |
| GPR157     | mRNA        | 1.651189 | 5.092191288 | 2.297908819 | NM_024980.4    |
| P2RX5-TAX1 | lncRNA      | 1.2289   | 4.1189498   | 2.296626368 | NR_037928.1    |
| RPL23AP42  | ncRNA       | 20.65383 | 48.72590069 | 2.296402065 | NM_001093758.2 |
| RNU6ATAC3  | ncRNA       | 0        | 1.29567565  | 2.29567565  | RNU6ATAC35P    |
| FBRSL1     | mRNA        | 6.714163 | 16.70366539 | 2.294956225 | NM_001142641.1 |
| VPS28      | mRNA        | 8.912042 | 21.74435455 | 2.2946185   | NM_183057.2    |
| BHLHA15    | mRNA        | 5.120847 | 13.03750683 | 2.293392694 | NM_177455.3    |
| EIF2B4     | mRNA        | 11.05824 | 26.65389909 | 2.293361755 | NM_172195.3    |
| RPL15P3    | ncRNA       | 6.320487 | 15.7751279  | 2.291531827 | RPL15P3        |
| FGFR1      | mRNA        | 8.680997 | 21.17624644 | 2.290698631 | NM_032191.1    |
| CFL1       | mRNA        | 101.3385 | 233.4221383 | 2.290655156 | NM_005507.2    |
| AMBP       | mRNA        | 309.8713 | 710.7756765 | 2.28961506  | NM_001633.3    |
| RN7SKP203  | ncRNA       | 126.1475 | 290.0270483 | 2.288893742 | RN7SKP203      |
| C11orf68   | mRNA        | 1.896146 | 5.623730659 | 2.287084541 | NM_031450.3    |
| POP5       | mRNA        | 7.050576 | 17.40396006 | 2.286042718 | NM_198202.1    |
| HLA-E      | mRNA        | 1.790251 | 5.375691105 | 2.284988781 | NM_005516.5    |
| OAF        | mRNA        | 7.854783 | 19.23264194 | 2.284939344 | NM_178507.2    |
| OCEL1      | mRNA        | 3.771093 | 9.901111899 | 2.284824636 | NM_024578      |
| RPL6P19    | ncRNA       | 2.85176  | 7.799349089 | 2.28450108  | RPL6P19        |
| KCTD17     | mRNA        | 0.998282 | 3.561897127 | 2.282909065 | NM_024681.3    |
| HIST1H2BF  | mRNA        | 16.43327 | 38.79795273 | 2.282874305 | NM_003522.3    |
| CXCL10     | mRNA        | 2.70284  | 7.451200512 | 2.282356607 | NM_001565.3    |
| FKBP8      | mRNA        | 13.7018  | 32.54832638 | 2.28191936  | NM_012181      |
| RPS27A     | mRNA        | 18.61821 | 43.76544858 | 2.281831192 | NM_002954.5    |
| LOC643373  | ncRNA       | 93.22718 | 214.0013901 | 2.281734401 | LOC643373      |
| SREBF1     | mRNA        | 12.58536 | 29.99485244 | 2.281488566 | NM_004176.4    |

|             |        |          |             |             |                |
|-------------|--------|----------|-------------|-------------|----------------|
| DHX30       | mRNA   | 12.56277 | 29.93337105 | 2.280756151 | NR_075079.1    |
| DBP         | mRNA   | 1.179638 | 3.970734323 | 2.280532034 | NM_001352.4    |
| C11orf31    | mRNA   | 37.73819 | 87.27281667 | 2.278702847 | NM_170746.2    |
| TRIM47      | mRNA   | 1.707352 | 5.167558341 | 2.27807757  | NM_033452.2    |
| VPS72       | mRNA   | 10.82242 | 25.93173862 | 2.278022725 | NM_005997.2    |
| NUDT2       | mRNA   | 2.904484 | 7.89337659  | 2.277734134 | NM_147173.2    |
| PSMB4       | mRNA   | 38.01858 | 87.8468091  | 2.277038467 | NM_002796.2    |
| CTSF        | mRNA   | 6.119637 | 15.2103572  | 2.276851669 | NM_003793.3    |
| ARAF        | mRNA   | 7.118637 | 17.48192667 | 2.276481547 | NM_001654.4    |
| ARFGAP2     | mRNA   | 8.932139 | 21.60983452 | 2.276431563 | NM_032389.4    |
| MRPS18A     | mRNA   | 6.547629 | 16.17974968 | 2.276178337 | NM_018135.3    |
| BRMS1       | mRNA   | 39.45356 | 91.07598987 | 2.276091206 | NM_015399.3    |
| PI4KB       | mRNA   | 6.381484 | 15.79640594 | 2.275478238 | NM_002651.2    |
| PLXNC1      | mRNA   | 7.829625 | 19.08855122 | 2.275130656 | NR_037687.1    |
| ATP6V1F     | mRNA   | 20.71758 | 48.40942378 | 2.275088823 | NM_004231.3    |
| PUSL1       | mRNA   | 2.33833  | 6.594118448 | 2.274825436 | NM_153339.1    |
| BAIAP2      | mRNA   | 1.911985 | 5.620650248 | 2.273586745 | NM_017451.2    |
| ARMC7       | mRNA   | 2.661565 | 7.320777275 | 2.272464492 | NM_024585      |
| REEP6       | mRNA   | 27.28903 | 63.26822892 | 2.271842441 | NM_138393.1    |
| SND1        | mRNA   | 60.80495 | 139.3922436 | 2.271537049 | NM_014390.2    |
| TRIM11      | mRNA   | 7.266612 | 17.77550527 | 2.271245417 | NM_145214.2    |
| DPCD        | mRNA   | 2.056729 | 5.939999884 | 2.270400746 | NM_015448.1    |
| RPUSD3      | mRNA   | 8.839409 | 21.33271352 | 2.269721018 | NM_173659.3    |
| BOLA3       | mRNA   | 18.09439 | 42.31526993 | 2.268481559 | NM_212552.2    |
| PAN2        | mRNA   | 4.282683 | 10.97658206 | 2.26714019  | NM_014871.4    |
| RPL23A      | mRNA   | 89.11234 | 203.2754806 | 2.266897863 | NM_000984.5    |
| ILF3-AS1    | lncRNA | 2.533223 | 7.008632384 | 2.266664628 | NR_024333.1    |
| LAD1        | mRNA   | 7.467035 | 18.18646671 | 2.266019583 | NM_005558.3    |
| CENPT       | mRNA   | 6.259246 | 15.42473074 | 2.262594714 | NM_025082.3    |
| LOC10537472 | lncRNA | 0.422449 | 2.218303299 | 2.262508788 | XR_952823.1    |
| ZNF598      | mRNA   | 6.87768  | 16.81955444 | 2.262030777 | NM_178167.3    |
| RPS2P46     | ncRNA  | 3.470595 | 9.112143434 | 2.261923646 | RPS2P46        |
| PPP1R16A    | mRNA   | 2.93649  | 7.903796204 | 2.261861546 | NM_032902.5    |
| MPG         | mRNA   | 3.442189 | 9.037563827 | 2.259598578 | NM_002434.3    |
| CD63        | mRNA   | 52.83069 | 120.5857489 | 2.258669691 | NM_001780.5    |
| APOE        | mRNA   | 64.36468 | 146.5921637 | 2.25798046  | NM_001302691.1 |
| PIF1        | mRNA   | 2.466424 | 6.827057458 | 2.257963277 | NM_025049.3    |
| C16orf95    | mRNA   | 0.710781 | 2.861470532 | 2.257138537 | NM_001256917.1 |
| ADCY3       | mRNA   | 0.937456 | 3.372917745 | 2.257040494 | NM_004036.3    |
| C12orf65    | mRNA   | 6.738773 | 16.46660138 | 2.257024674 | NM_152269.4    |
| SBNO2       | mRNA   | 5.271992 | 13.14091345 | 2.254612939 | NM_014963.2    |
| NFIX        | mRNA   | 0.897292 | 3.275775287 | 2.253619856 | NM_002501.3    |
| RPL30       | mRNA   | 18.68765 | 43.35368146 | 2.25286848  | NM_000989.3    |
| GAL3ST1     | mRNA   | 1.754441 | 5.203451856 | 2.252163551 | NM_004861.1    |
| NME2        | mRNA   | 22.81324 | 52.62119897 | 2.25173905  | NM_002512.3    |
| MIR6753     | miRNA  | 1.002028 | 3.50780481  | 2.251618865 | NR_106811.1    |

|           |         |          |             |             |                |
|-----------|---------|----------|-------------|-------------|----------------|
| EPHB4     | mRNA    | 20.84845 | 48.19341666 | 2.251574273 | NM_004444.4    |
| DPH2      | mRNA    | 4.843611 | 12.15524124 | 2.251217636 | NM_201399.1    |
| MPST      | mRNA    | 12.84685 | 30.16940658 | 2.251010288 | NR_024038.1    |
| AHSA1     | mRNA    | 33.68819 | 77.04642707 | 2.24994212  | NM_012111.2    |
| AP1M1     | mRNA    | 15.32672 | 35.72943469 | 2.249652157 | NM_032493.3    |
| FBXO2     | mRNA    | 3.545369 | 9.224606234 | 2.249455644 | NM_012168.5    |
| MCRIP1    | mRNA    | 2.145664 | 6.075345504 | 2.249237236 | NM_207368.4    |
| ARHGEF10L | mRNA    | 5.948916 | 14.62940884 | 2.249186717 | NM_018125.3    |
| ACAA1     | mRNA    | 14.70879 | 34.32740674 | 2.248894691 | NR_024024.1    |
| LINC01237 | lncRNA  | 0        | 1.248437476 | 2.248437476 | NR_110220.1    |
| ARAP1     | mRNA    | 3.00706  | 8.007109051 | 2.247809673 | NM_015242.4    |
| C19orf43  | mRNA    | 46.7716  | 106.3635803 | 2.247435285 | NM_024038.2    |
| SHISA5    | mRNA    | 33.90007 | 77.42762113 | 2.247205352 | NM_016479.4    |
| C2orf72   | mRNA    | 18.26428 | 42.2905493  | 2.247192434 | NM_001144994.1 |
| NDUFB10   | mRNA    | 12.49588 | 29.30048723 | 2.245165228 | NM_004548.2    |
| ANKRD13D  | mRNA    | 29.8667  | 68.28283293 | 2.244581607 | NR_030767.1    |
| RPUSD4    | mRNA    | 6.869    | 16.66067643 | 2.244335519 | NM_032795.2    |
| TIMM44    | mRNA    | 11.74978 | 27.61343946 | 2.244229266 | NM_006351.3    |
| FADS2     | mRNA    | 138.934  | 313.0376294 | 2.244183794 | NM_004265.3    |
| ALDOC     | mRNA    | 7.379359 | 17.80155406 | 2.243793815 | NM_005165.2    |
| TONSL     | mRNA    | 6.005512 | 14.71646483 | 2.24344267  | NM_013432.4    |
| UQCC3     | mRNA    | 1.516917 | 4.646492217 | 2.243416344 | NM_001085372.2 |
| C17orf49  | mRNA    | 2.001837 | 5.733687596 | 2.243188672 | NM_174893.3    |
| EML1      | mRNA    | 5.781083 | 14.21022774 | 2.24303798  | NM_004434.2    |
| MTA2      | mRNA    | 26.13044 | 59.84299003 | 2.242609432 | NM_004739.3    |
| GOT2      | mRNA    | 33.90779 | 77.28426332 | 2.242601343 | NM_002080.3    |
| BLOC1S1   | mRNA    | 5.471242 | 13.50984516 | 2.242204203 | NR_037655.1    |
| PMM1      | mRNA    | 1.890239 | 5.479841733 | 2.241974387 | NM_002676.2    |
| CLPTM1    | mRNA    | 30.10579 | 68.71217654 | 2.24113174  | NM_001294.3    |
| RPS28P7   | ncRNA   | 74.93569 | 169.1323167 | 2.240479019 | RPS28P7        |
| GTF2IP13  | miscRNA | 1.329956 | 4.21930189  | 2.240086329 |                |
| EMP3      | mRNA    | 11.29911 | 26.54337705 | 2.239461239 | NM_001425.2    |
| CARS2     | mRNA    | 5.582844 | 13.73820117 | 2.238880575 | NM_024537      |
| CDC42EP1  | mRNA    | 25.33996 | 57.95041649 | 2.238060308 | NM_152243.2    |
| C14orf1   | mRNA    | 12.80514 | 29.88467474 | 2.237186385 | NM_007176.3    |
| TUBB      | mRNA    | 55.43393 | 125.2462939 | 2.237063821 | NR_120608.1    |
| MUS81     | mRNA    | 5.957059 | 14.56177472 | 2.236832502 | NM_025128.4    |
| MRPL27    | mRNA    | 6.311496 | 15.34352744 | 2.235319266 | NM_148571.1    |
| OIP5      | mRNA    | 4.653433 | 11.6359221  | 2.235088466 | NM_007280.1    |
| PAM16     | mRNA    | 2.532524 | 6.895479317 | 2.235081758 | NM_016069.9    |
| IMPDH2    | mRNA    | 17.18563 | 39.64580164 | 2.235050345 | NM_000884.2    |
| RNU6-343P | ncRNA   | 3.160243 | 8.29730753  | 2.234799007 | RNU6-343P      |
| ZNF773    | mRNA    | 2.992928 | 7.918932501 | 2.233682052 | NR_130705.1    |
| AGBL5     | mRNA    | 1.801454 | 5.255298314 | 2.232875499 | NR_104246.1    |
| GPKOW     | mRNA    | 11.6149  | 27.15982277 | 2.232267284 | NM_015698.5    |
| TMEM38A   | mRNA    | 0.901826 | 3.244719449 | 2.231918442 | NM_024074.1    |



|           |         |          |             |             |                |
|-----------|---------|----------|-------------|-------------|----------------|
| MDK       | mRNA    | 55.75572 | 125.5979057 | 2.230575253 | NR_073039.1    |
| FAXDC2    | mRNA    | 15.65232 | 36.13833093 | 2.230219011 | NM_032385.3    |
| PTK2B     | mRNA    | 3.029013 | 7.983228658 | 2.229635158 | NM_173176.2    |
| ARHGEF5   | mRNA    | 2.904568 | 7.704642707 | 2.229348694 | NM_005435.3    |
| ERAL1     | mRNA    | 25.52071 | 58.10146791 | 2.228502867 | NM_005702.2    |
| PMS2P2    | miscRNA | 0.257172 | 1.800563345 | 2.227669917 | NR_003613.1    |
| PRKAG1    | mRNA    | 10.81249 | 25.30931543 | 2.227245958 | NM_212461.1    |
| PLA2G12B  | mRNA    | 4.897676 | 12.12939735 | 2.226198601 | NM_032562.3    |
| HIST1H2BN | mRNA    | 18.29985 | 41.96084551 | 2.225967883 | NM_003520.3    |
| RPS12     | mRNA    | 167.5997 | 374.275102  | 2.225834924 | NM_001016.3    |
| RAD9A     | mRNA    | 16.48964 | 37.92851555 | 2.2258043   | NM_004584.2    |
| SNORD79   | snoRNA  | 38.54716 | 87.00222052 | 2.225247269 | NR_003939.1    |
| SESN2     | mRNA    | 4.984012 | 12.31112221 | 2.224447862 | NM_031459.4    |
| CYC1      | mRNA    | 12.09107 | 28.11518742 | 2.224049414 | NM_001916.4    |
| SLC8B1    | mRNA    | 2.366747 | 6.487532482 | 2.223966214 | NM_024959.2    |
| FBLIM1    | mRNA    | 16.55892 | 38.01686436 | 2.222054362 | NM_017556.2    |
| GAA       | mRNA    | 6.863381 | 16.47111079 | 2.221831914 | NM_001079804.1 |
| STMN3     | mRNA    | 0.776987 | 2.946666609 | 2.220988485 | NR_075070.1    |
| SNORD110  | snoRNA  | 50.39535 | 113.1383978 | 2.220792477 | NR_003078.1    |
| C16orf59  | mRNA    | 1.917887 | 5.47717434  | 2.21981657  | NM_025108.2    |
| AMOTL2    | mRNA    | 11.84586 | 27.51189243 | 2.21953872  | NM_016201.3    |
| COX4I1    | mRNA    | 33.66743 | 75.93384328 | 2.219196665 | NM_001861.3    |
| GAK       | mRNA    | 15.63327 | 35.91124068 | 2.219121338 | NM_005255.2    |
| INF2      | mRNA    | 5.211467 | 12.78266614 | 2.218906654 | NM_032714.2    |
| MIR671    | miRNA   | 0        | 1.218813536 | 2.218813536 | NR_030407.1    |
| TACC3     | mRNA    | 32.7867  | 73.95601521 | 2.218506449 | NM_006342.2    |
| TMEM201   | mRNA    | 4.729274 | 11.71019163 | 2.218464715 | NM_001130924.2 |
| CERCAM    | mRNA    | 2.231354 | 6.164808186 | 2.217277483 | NM_016174.4    |
| ZNF593    | mRNA    | 2.660061 | 7.113399142 | 2.216738848 | NM_015871.4    |
| POMGNT2   | mRNA    | 2.22003  | 6.137850663 | 2.21670339  | NM_032806.5    |
| COX8A     | mRNA    | 11.99272 | 27.79952608 | 2.216589783 | NM_004074.2    |
| RPL6P10   | ncRNA   | 1.068251 | 3.583813581 | 2.216275024 | RPL6P10        |
| SPR       | mRNA    | 6.082223 | 14.68758025 | 2.215064484 | NM_003124.4    |
| NME4      | mRNA    | 23.35188 | 52.94054318 | 2.215046295 | NM_005009.2    |
| RN7SL381P | ncRNA   | 8.82323  | 20.75254993 | 2.214399028 | RN7SL381P      |
| EFHD2     | mRNA    | 5.842335 | 14.15012788 | 2.214175175 | NM_024329.5    |
| RPP25     | mRNA    | 1.901835 | 5.424843443 | 2.214062127 | NM_017793.2    |
| ARF1      | mRNA    | 79.17771 | 176.4249293 | 2.212895826 | NM_001658.3    |
| CHST13    | mRNA    | 8.01398  | 18.94489873 | 2.212662824 | NM_152889.2    |
| VAT1      | mRNA    | 21.62899 | 49.06983951 | 2.21264146  | NM_006373.3    |
| PHB2      | mRNA    | 35.70061 | 80.17772571 | 2.211890419 | NM_001267700.1 |
| RN7SL566P | ncRNA   | 1.717763 | 5.011149728 | 2.211800649 | RN7SL566P      |
| FAAP24    | mRNA    | 1.844132 | 5.290137054 | 2.211619254 | NM_152266.4    |
| LSR       | mRNA    | 12.84074 | 29.60999942 | 2.211586491 | NM_205835.3    |
| ICAM3     | mRNA    | 1.235038 | 3.942015838 | 2.21115557  | NM_002162.3    |
| DGAT1     | mRNA    | 6.712863 | 16.04012331 | 2.20931236  | NM_012079.5    |

|              |        |          |             |             |                |
|--------------|--------|----------|-------------|-------------|----------------|
| TFR2         | mRNA   | 3.550079 | 9.050663568 | 2.208898616 | NM_003227.3    |
| UQCC2        | mRNA   | 9.088652 | 21.28277985 | 2.208697486 | NM_032340.3    |
| LOC105369351 | lncRNA | 0        | 1.208571405 | 2.208571405 | XR_950187.1    |
| PLEKHJ1      | mRNA   | 7.426933 | 17.60725366 | 2.208069421 | NM_018049.1    |
| ITGA5        | mRNA   | 9.782626 | 22.80815955 | 2.208011256 | NM_002205.2    |
| RAB42        | mRNA   | 0.162545 | 1.564807091 | 2.206200916 | NM_152304.1    |
| SNX17        | mRNA   | 5.246004 | 12.7778536  | 2.205866979 | NR_049782.1    |
| GSG2         | mRNA   | 11.69188 | 26.99517287 | 2.205754055 | NM_031965.2    |
| GLYCTK       | mRNA   | 4.843489 | 11.88407345 | 2.204859847 | NR_026699.1    |
| PYM1         | mRNA   | 16.48688 | 37.53866158 | 2.203861389 |                |
| CHDH         | mRNA   | 11.59148 | 26.74654571 | 2.203597417 | NM_018397.4    |
| BANF1        | mRNA   | 19.40038 | 43.94499914 | 2.203144946 | NM_003860.3    |
| AP1G2        | mRNA   | 7.253648 | 17.18397227 | 2.203143614 | NM_080545.1    |
| NKX3-1       | mRNA   | 1.602757 | 4.734093172 | 2.20308457  | NR_046072.1    |
| CIZ1         | mRNA   | 13.72743 | 31.44436006 | 2.202989201 | NM_012127.2    |
| TRAF7        | mRNA   | 7.50195  | 17.71526708 | 2.201291198 | NM_206835.1    |
| F10          | mRNA   | 8.345017 | 19.56925743 | 2.201093544 | NM_001312675.1 |
| COMT         | mRNA   | 6.062619 | 14.54429659 | 2.200925119 | NM_007310.2    |
| BRF1         | mRNA   | 3.757034 | 9.469629445 | 2.20087355  | NM_145696.1    |
| STAT6        | mRNA   | 12.39875 | 28.48841621 | 2.200833239 | NR_033659.1    |
| PARP1        | mRNA   | 37.23774 | 83.1521389  | 2.200761471 | NM_001618.3    |
| SNRPC        | mRNA   | 17.55402 | 39.82525806 | 2.200345485 | NR_029472.1    |
| C19orf25     | mRNA   | 2.165624 | 5.964627791 | 2.200080501 | NM_152482.2    |
| LINC01515    | lncRNA | 6.292561 | 15.03861532 | 2.199311789 | NR_120647.1    |
| SRPRA        | mRNA   | 20.98802 | 47.34830603 | 2.198847891 |                |
| RNA5SP383    | ncRNA  | 0        | 1.198499977 | 2.198499977 | RNA5SP383      |
| RHOC         | mRNA   | 13.41011 | 30.67885409 | 2.19837715  | NM_175744.4    |
| PNMA6A       | mRNA   | 0.144278 | 1.515223851 | 2.198088083 | NM_032882.5    |
| NAPA         | mRNA   | 12.19242 | 27.99077365 | 2.197532244 | NR_038456.1    |
| DNAJC11      | mRNA   | 17.26666 | 39.13231627 | 2.197025944 | NM_018198.3    |
| SH3BP1       | mRNA   | 3.444861 | 8.765426848 | 2.197014902 | NM_018957.3    |
| MCM2         | mRNA   | 22.02348 | 49.58037542 | 2.196903974 | NR_073375.1    |
| ENO1         | mRNA   | 99.17959 | 219.0011957 | 2.196068091 | NM_001428.3    |
| DDX49        | mRNA   | 8.1249   | 19.03837283 | 2.196010187 | NR_033677.1    |
| BLOC1S4      | mRNA   | 1.700726 | 4.930439749 | 2.195868719 | NM_018366.2    |
| TMEM258      | mRNA   | 49.17984 | 109.1772241 | 2.195646997 | NM_014206.3    |
| UBE2M        | mRNA   | 26.20265 | 58.69818783 | 2.194572754 | NM_003969.3    |
| SCARB1       | mRNA   | 26.01035 | 58.27279974 | 2.194447958 | NM_005505.4    |
| LINC01194    | lncRNA | 11.85091 | 27.19673024 | 2.194142304 | NR_033383.1    |
| DNAJA3       | mRNA   | 20.57875 | 46.32638346 | 2.193193535 | NM_005147.5    |
| SAMD11       | mRNA   | 3.410192 | 8.671996698 | 2.193101032 | NM_152486.2    |
| SMPD1        | mRNA   | 1.962571 | 5.496305625 | 2.192792889 | NR_027400.1    |
| NPM3         | mRNA   | 8.057359 | 18.8589506  | 2.192576261 | NM_006993.2    |
| CEP131       | mRNA   | 1.235916 | 3.901643759 | 2.192231009 | NM_014984.2    |
| UBXN1        | mRNA   | 7.894769 | 18.49569809 | 2.191816158 | NM_015853.4    |
| ORAI1        | mRNA   | 2.521448 | 6.716077254 | 2.19116587  | NM_032790.3    |

|             |         |          |             |             |                |
|-------------|---------|----------|-------------|-------------|----------------|
| MRPL55      | mRNA    | 3.257983 | 8.325820615 | 2.190196898 | NM_181465.2    |
| CTIF        | mRNA    | 3.726051 | 9.348058266 | 2.189578197 | NM_014772.2    |
| DRG2        | mRNA    | 11.5122  | 26.39419781 | 2.189398375 | NM_001388.4    |
| ANXA11      | mRNA    | 9.426347 | 21.82736573 | 2.189392473 | NM_145869.1    |
| TTR         | mRNA    | 37.14732 | 82.51459473 | 2.189265291 | NM_000371.3    |
| MNX1        | mRNA    | 0.755205 | 2.842031195 | 2.188935635 | NM_005515.3    |
| MRGBP       | mRNA    | 6.181269 | 14.71827826 | 2.188788466 | NM_018270.4    |
| SFI1        | mRNA    | 6.046167 | 14.41685365 | 2.187977292 | NM_014775.3    |
| BOP1        | mRNA    | 7.854383 | 18.37008617 | 2.187626884 | NM_015201      |
| C20orf24    | mRNA    | 14.7564  | 33.46016261 | 2.187057953 | NR_026562.3    |
| RRP9        | mRNA    | 4.77832  | 11.63651052 | 2.186883209 | NM_004704.4    |
| LOC10013098 | lncRNA  | 2.31999  | 6.260399878 | 2.186873787 | NR_024469.1    |
| SDF4        | mRNA    | 12.38251 | 28.26299831 | 2.18666064  | NM_016547.2    |
| STAG3L1     | miscRNA | 4.227454 | 10.42661345 | 2.185885208 | NR_040583.2    |
| MOGS        | mRNA    | 8.344352 | 19.4243934  | 2.185747392 | NM_006302.2    |
| KLF16       | mRNA    | 6.090611 | 14.49657748 | 2.185506691 | NM_031918.3    |
| SAA2-SAA4   | mRNA    | 0.386665 | 2.03039996  | 2.185387121 | NM_001199744.1 |
| NDUFB6      | mRNA    | 4.962426 | 12.02675935 | 2.184808508 | NM_182739.2    |
| MTX1        | mRNA    | 1.894612 | 5.323434362 | 2.18455346  | NM_198883.3    |
| C1orf174    | mRNA    | 5.894455 | 14.05655245 | 2.183864147 | NM_207356.2    |
| G6PD        | mRNA    | 10.28794 | 23.64986598 | 2.183735218 | NM_001042351.2 |
| YRDC        | mRNA    | 1.969128 | 5.483333226 | 2.183581869 | NM_024640.3    |
| POLE3       | mRNA    | 23.26107 | 51.91171422 | 2.180930369 | NR_027261.1    |
| PFKL        | mRNA    | 6.440648 | 15.22750482 | 2.180926323 | NR_024108.1    |
| GALE        | mRNA    | 4.836277 | 11.72781093 | 2.18081008  | NM_001127621.1 |
| TOP3B       | mRNA    | 8.505123 | 19.71212965 | 2.179049128 | NM_003935.4    |
| RBP1        | mRNA    | 1.768206 | 5.029347582 | 2.17807037  | NM_002899.3    |
| MLF2        | mRNA    | 56.05415 | 123.2525188 | 2.177800014 | NR_026581.1    |
| CSNK2B      | mRNA    | 15.67146 | 35.30415825 | 2.17762347  | NM_001320.6    |
| HOMER3      | mRNA    | 5.060218 | 12.19674888 | 2.177603034 | NR_027297.1    |
| GS1-124K5.4 | lncRNA  | 1.328835 | 4.070377279 | 2.17721578  | XR_252237.2    |
| POLG        | mRNA    | 10.12301 | 23.21554811 | 2.177068012 | NM_002693.2    |
| STXBP2      | mRNA    | 5.284556 | 12.68122382 | 2.176959429 | NR_073560.1    |
| LINC01594   | lncRNA  | 0        | 1.176923054 | 2.176923054 | NR_131251.1    |
| EMG1        | mRNA    | 16.20558 | 36.45315332 | 2.176802307 | NM_006331.7    |
| SAMM50      | mRNA    | 6.270095 | 14.82427078 | 2.17662491  | NM_015380.4    |
| SNORA48     | snoRNA  | 9.738231 | 22.37199956 | 2.176522308 | NR_002918.1    |
| NRARP       | mRNA    | 2.006351 | 5.542090697 | 2.176090439 | NM_001004354.2 |
| ISY1        | mRNA    | 2.94978  | 7.595072693 | 2.17608918  | NM_020701.3    |
| C8orf82     | mRNA    | 1.445991 | 4.317577555 | 2.173996986 | NM_001001795.1 |
| VPS51       | mRNA    | 3.751071 | 9.32745634  | 2.173711055 | NR_073519.1    |
| MED9        | mRNA    | 5.029082 | 12.10366313 | 2.17340934  | NM_018019.2    |
| ATP5D       | mRNA    | 6.104727 | 14.43975875 | 2.173167082 | NM_001687.4    |
| KLHDC8B     | mRNA    | 1.576332 | 4.598561061 | 2.173074063 | NM_173546.2    |
| LRSAM1      | mRNA    | 3.052742 | 7.806875602 | 2.173066138 | NM_138361.5    |
| TP53I13     | mRNA    | 7.293668 | 17.02198323 | 2.17298095  | NM_138349.2    |

|           |              |          |             |             |                |
|-----------|--------------|----------|-------------|-------------|----------------|
| CLASRP    | mRNA         | 9.616345 | 22.06860815 | 2.17293318  | NR_103529.1    |
| INTS1     | mRNA         | 8.265999 | 19.13045093 | 2.172507377 | NM_001080453.2 |
| ATIC      | mRNA         | 39.03546 | 85.95618153 | 2.171979019 | NM_004044.6    |
| HIST1H3E  | mRNA         | 4.624079 | 11.20675303 | 2.170444841 | NM_003532.2    |
| MIR6772   | miRNA        | 2.567698 | 6.741562368 | 2.169904267 | NR_106830.1    |
| KIFC1     | mRNA         | 6.854364 | 16.03856513 | 2.169311993 | NM_002263.3    |
| S100A3    | mRNA         | 0        | 1.16926827  | 2.16926827  | NM_002960.1    |
| DHX38     | mRNA         | 9.703522 | 22.21557209 | 2.168965701 | NM_014003.3    |
| RPS5      | mRNA         | 43.68898 | 95.87999813 | 2.167872356 | NM_001009.3    |
| SOWAHB    | mRNA         | 0.506331 | 2.264881846 | 2.167439364 | NM_001029870.1 |
| RNASEK    | mRNA         | 12.30896 | 27.84064148 | 2.167008902 | NR_037715.1    |
| RCN1      | mRNA         | 9.144106 | 20.9785131  | 2.166628862 | NM_002901.2    |
| SLC27A4   | mRNA         | 8.12408  | 18.76499963 | 2.166245835 | NM_005094.3    |
| MZT2A     | mRNA         | 5.610944 | 13.31804423 | 2.16580931  | NM_001085365.1 |
| TCF25     | mRNA         | 18.30155 | 40.75773868 | 2.163439876 | NM_014972.2    |
| MAN2C1    | mRNA         | 4.033253 | 9.883457675 | 2.162310899 | NM_006715.3    |
| CDK10     | mRNA         | 12.69664 | 28.61430689 | 2.162158854 | NR_027702.1    |
| NFKBIA    | mRNA         | 25.27388 | 55.80252603 | 2.161939075 | NM_020529.2    |
| NDUFA2    | mRNA         | 5.438906 | 12.91999975 | 2.161858    | NR_033697.1    |
| SMPD2     | mRNA         | 2.126658 | 5.752799888 | 2.159750209 | NM_003080.2    |
| F8A1      | mRNA         | 2.124159 | 5.746039841 | 2.159313992 | NM_012151.3    |
| EIF5AP4   | ncRNA        | 1.850214 | 5.152200514 | 2.158504714 | EIF5AP4        |
| RPS2      | mRNA         | 105.0194 | 227.7913331 | 2.158014267 | NM_002952.3    |
| UBXN11    | mRNA         | 3.636071 | 9.003302577 | 2.157711484 | NM_183008.2    |
| TERC      | telomerase_I | 80.16227 | 174.1146751 | 2.157587248 | NR_001566.1    |
| RPL26L1   | mRNA         | 6.145574 | 14.41427047 | 2.157177348 | NM_016093.2    |
| JOSD1     | mRNA         | 10.64876 | 24.12340753 | 2.156746019 | NM_014876.5    |
| MUC13     | mRNA         | 4.166823 | 10.14083342 | 2.156225092 | NM_033049.3    |
| ALG12     | mRNA         | 3.874791 | 9.507258762 | 2.155427579 | NM_024105.3    |
| MMS19     | mRNA         | 7.31797  | 16.9262096  | 2.155118397 | NM_022362.4    |
| ABHD15    | mRNA         | 4.541734 | 10.94143218 | 2.154818544 | NM_198147.2    |
| SCAND1    | mRNA         | 3.116447 | 7.867614726 | 2.154191376 | NM_033630.2    |
| GSTM2     | mRNA         | 1.000672 | 3.308443778 | 2.153497852 | NM_001142368.1 |
| IVD       | mRNA         | 5.006114 | 11.92668477 | 2.152254259 | NM_002225.3    |
| FAM85A    | lncRNA       | 0.261053 | 1.713502747 | 2.151775918 | XR_956605.1    |
| NME1-NME2 | mRNA         | 11.8015  | 26.54284118 | 2.151533119 | NR_037149.1    |
| ETFB      | mRNA         | 14.77857 | 32.9426281  | 2.151185266 | NM_001985.2    |
| RNU6ATAC  | snRNA        | 0        | 1.150559978 | 2.150559978 | NR_023344.1    |
| S100A16   | mRNA         | 2.841159 | 7.260622265 | 2.150554498 | NM_080388.1    |
| GRWD1     | mRNA         | 13.24832 | 29.63066717 | 2.149774516 | NM_031485.3    |
| DBNL      | mRNA         | 5.408604 | 12.77391319 | 2.149284524 | NM_014063.6    |
| RTEL1     | mRNA         | 1.410856 | 4.181303333 | 2.149155113 | NM_032957.4    |
| METTL17   | mRNA         | 24.38306 | 53.54999895 | 2.149070696 | NM_022734.2    |
| COL2A1    | mRNA         | 9.956476 | 22.5399501  | 2.148496506 | NM_033150.2    |
| STBD1     | mRNA         | 4.956152 | 11.79411702 | 2.148050633 | NM_003943.4    |
| EPS8L3    | mRNA         | 15.85976 | 35.1959321  | 2.146882414 | NM_139053.2    |

|              |         |          |             |             |                |
|--------------|---------|----------|-------------|-------------|----------------|
| RRP7BP       | miscRNA | 5.35561  | 12.64283852 | 2.146582239 | NR_002184.2    |
| LOC105372911 | lncRNA  | 0.287798 | 1.763117304 | 2.145613934 | XR_922599.1    |
| WDR83        | mRNA    | 3.619164 | 8.908327424 | 2.145047924 | NR_029375.1    |
| C1orf122     | mRNA    | 1.246833 | 3.819195677 | 2.144883349 | NM_198446.2    |
| SNORD38B     | snoRNA  | 2.381633 | 6.253043356 | 2.144834816 | NR_001457.1    |
| ARHGEF1      | mRNA    | 5.136829 | 12.16228277 | 2.14480209  | NM_199002.1    |
| IPO4         | mRNA    | 12.71081 | 28.40643591 | 2.144762424 | NR_051979.1    |
| MIEN1        | mRNA    | 2.171294 | 5.800806563 | 2.14448966  | NM_032339.3    |
| ASF1B        | mRNA    | 12.91117 | 28.83046737 | 2.144353136 | NM_018154.2    |
| PRMT1        | mRNA    | 46.45691 | 100.7346816 | 2.143727492 | NR_033397.4    |
| PARK7        | mRNA    | 19.09676 | 42.075779   | 2.143419029 | NM_007262.4    |
| MIR4292      | miRNA   | 73.58178 | 158.845967  | 2.143230684 | NR_036251.1    |
| SV2A         | mRNA    | 1.153603 | 3.61504069  | 2.142939092 | NM_014849.4    |
| PRPF19       | mRNA    | 54.12237 | 117.0956491 | 2.142426833 | NM_014502.4    |
| IRF9         | mRNA    | 3.427677 | 8.485208416 | 2.142253707 | NM_006084.4    |
| GNPTG        | mRNA    | 3.77926  | 9.238239312 | 2.142222714 | NM_032520.4    |
| VEGFB        | mRNA    | 3.186506 | 7.96786688  | 2.142088789 | NM_003377.4    |
| SERPINF2     | mRNA    | 28.20894 | 61.56781828 | 2.142077928 | NM_001165921.1 |
| C1S          | mRNA    | 3.09841  | 7.776819485 | 2.141518181 | NM_201442.2    |
| UBL7         | mRNA    | 4.822608 | 11.46737519 | 2.14120111  | NM_201265.1    |
| MIEF2        | mRNA    | 1.951694 | 5.319436611 | 2.140952356 | NM_148886.1    |
| SLC9A3R2     | mRNA    | 2.999261 | 7.561225676 | 2.140701852 | NM_004785.5    |
| PPFIA3       | mRNA    | 2.287211 | 6.03546593  | 2.140253782 | NR_103842.1    |
| CLCN7        | mRNA    | 4.617801 | 11.02196913 | 2.139977787 | NM_001287.5    |
| PQLC2        | mRNA    | 1.864692 | 5.128934897 | 2.139474228 | NR_109848.1    |
| SH3GLB2      | mRNA    | 4.774626 | 11.35092779 | 2.13882731  | NM_020145.3    |
| FOXA3        | mRNA    | 9.170902 | 20.75230729 | 2.138680247 | NM_004497.2    |
| H2BFS        | ncRNA   | 0        | 1.138416864 | 2.138416864 | NM_017445.1    |
| F2           | mRNA    | 27.96637 | 60.94187228 | 2.138406403 | NM_001311257.1 |
| CUTA         | mRNA    | 6.030556 | 14.03414485 | 2.138400565 | NM_015921.2    |
| KIF12        | mRNA    | 5.903524 | 13.76200496 | 2.138328808 | NM_138424.1    |
| LRRC20       | mRNA    | 1.731336 | 4.840298413 | 2.138256967 | NR_103467.1    |
| PPP2R5B      | mRNA    | 1.92309  | 5.249490006 | 2.137973595 | NM_006244.3    |
| RPS6         | mRNA    | 263.0512 | 563.4829323 | 2.137778504 | NM_001010.2    |
| PDLIM1       | mRNA    | 29.01823 | 63.17156839 | 2.13775297  | NM_020992.3    |
| FGFR4        | mRNA    | 40.54496 | 87.7903102  | 2.1372104   | NM_213647.2    |
| DMKN         | mRNA    | 6.309456 | 14.62044474 | 2.137018773 | NR_033746.1    |
| LONP1        | mRNA    | 16.56662 | 36.53853861 | 2.136924555 | NR_076392.1    |
| KARS         | mRNA    | 53.12898 | 114.6362768 | 2.136309995 | NM_005548.2    |
| SNRNP25      | mRNA    | 5.296172 | 12.44850804 | 2.135981692 | NM_024571.3    |
| SNORD86      | snoRNA  | 5.732534 | 13.37860439 | 2.135689733 | NR_004399.1    |
| SLC25A22     | mRNA    | 1.721633 | 4.811821467 | 2.135417006 | NM_024698.5    |
| ATRAID       | mRNA    | 6.270244 | 14.51918891 | 2.134617281 | NM_080592.3    |
| RASSF8-AS1   | lncRNA  | 1.702929 | 4.769160529 | 2.134410669 | NR_038227.1    |
| ATOX1        | mRNA    | 4.70482  | 11.1761961  | 2.134369809 | NM_004045.3    |
| PKM          | mRNA    | 178.3832 | 381.8523788 | 2.134271114 | NM_182471.2    |

|             |             |          |             |                            |
|-------------|-------------|----------|-------------|----------------------------|
| LOC10798623 | lncRNA      | 0.829963 | 2.905454489 | 2.134171427                |
| ECH1        | mRNA        | 35.91117 | 77.77439278 | 2.134161191 NM_001398.2    |
| ACD         | mRNA        | 3.579366 | 8.771209897 | 2.133747517 NM_022914.2    |
| ERGIC3      | mRNA        | 37.17334 | 80.43812434 | 2.133376705 NM_198398.1    |
| HMBS        | mRNA        | 4.077114 | 9.830733985 | 2.133246231 NM_001258209.1 |
| PTRF        | mRNA        | 6.557026 | 15.11811748 | 2.132865024 NM_012232.5    |
| POU6F2-AS1  | lncRNA      | 0        | 1.132440923 | 2.132440923 NR_046711.1    |
| SNORA78     | snoRNA      | 0        | 1.132440923 | 2.132440923 NR_003020.1    |
| AP2M1       | mRNA        | 32.3772  | 70.16131873 | 2.132033677 NM_004068.3    |
| RTKN        | mRNA        | 8.304355 | 18.83478967 | 2.131774917 NM_033046.2    |
| RNF187      | mRNA        | 12.32626 | 27.40521491 | 2.131521882 NM_001010858.2 |
| MCRS1       | mRNA        | 3.437096 | 8.457099098 | 2.131371114 NM_006337.4    |
| GPX4        | mRNA        | 41.28715 | 89.11983937 | 2.131140039 NM_002085.4    |
| ESPL1       | mRNA        | 8.629841 | 19.52162846 | 2.131045412 NM_012291.4    |
| ACTR1A      | mRNA        | 14.01375 | 30.98662661 | 2.130489048 NM_005736.3    |
| TRP-AGG2-6  | tRNA        | 2.282398 | 5.992499883 | 2.130302315 TRP-AGG2-6     |
| TIMP1       | mRNA        | 4.400874 | 10.50419943 | 2.130062398 NM_003254.2    |
| SRC         | mRNA        | 9.268705 | 20.86812786 | 2.129589585 NM_198291.2    |
| MRPS12      | mRNA        | 3.353728 | 8.271651044 | 2.12958917 NM_033363.1     |
| TMEM259     | mRNA        | 17.65225 | 38.69754298 | 2.128298095 NM_033420.3    |
| ZNF76       | mRNA        | 3.833317 | 9.286551543 | 2.128259062 NM_003427.4    |
| CSRP1       | mRNA        | 21.22561 | 46.29523623 | 2.127961252 NM_004078.2    |
| SLC4A2      | mRNA        | 26.12109 | 56.69882959 | 2.127452846 NM_003040.3    |
| APOC1       | mRNA        | 45.80537 | 98.56629118 | 2.12724099 NM_001645.3     |
| RPL4P4      | ncRNA       | 2.05988  | 5.508426076 | 2.127020029 RPL4P4         |
| ZNF414      | mRNA        | 1.638645 | 4.609615295 | 2.125945711 NM_032370.2    |
| MIR3610     | Precursor_m | 2.251132 | 5.910410844 | 2.125539792 NR_037404.1    |
| TRR-CCT3-1  | tRNA        | 2.251132 | 5.910410844 | 2.125539792 TRR-CCT3-1     |
| SNRNP70     | mRNA        | 49.27503 | 105.8243576 | 2.124799323 NM_003089.5    |
| SCRIB       | mRNA        | 6.424657 | 14.77338415 | 2.124459621 NM_182706.4    |
| COQ9        | mRNA        | 4.962087 | 11.66568361 | 2.124370769 NM_020312.3    |
| ARVCF       | mRNA        | 1.116727 | 3.496680693 | 2.124355059 NM_001670.2    |
| RIC8A       | mRNA        | 4.517736 | 10.7209197  | 2.124226226 NM_021932.5    |
| SPSB2       | mRNA        | 2.620587 | 6.689302195 | 2.123772184 NM_032641.3    |
| LOC10272449 | lncRNA      | 0        | 1.123593728 | 2.123593728 XR_432221      |
| IFRD2       | mRNA        | 5.766058 | 13.36591724 | 2.123232975 NM_006764.4    |
| TMEM219     | mRNA        | 3.002316 | 7.496259929 | 2.122835853 NM_194280.3    |
| PSME1       | mRNA        | 15.30617 | 33.61076988 | 2.122556147 NM_176783.2    |
| PTGER4      | mRNA        | 6.157664 | 14.1883311  | 2.121967689 NM_000958.2    |
| LOC10537450 | lncRNA      | 0        | 1.121840852 | 2.121840852 XR_944693.1    |
| PUF60       | mRNA        | 9.033994 | 20.28874306 | 2.12166196 NM_078480.2     |
| MIR4751     | Precursor_m | 2.220711 | 5.830540427 | 2.120817234 NR_039906.1    |
| SLC12A9     | mRNA        | 3.424631 | 8.383346257 | 2.120707129 NM_020246.3    |
| ND4L        | mRNA        | 5630.468 | 11939.96522 | 2.12040002 YP_003024034.1  |
| RHBDD3      | mRNA        | 24.5697  | 53.21467509 | 2.120270312 NM_012265.1    |
| NAT8        | mRNA        | 1.684678 | 4.691239424 | 2.119896726 NM_003960.3    |

|             |             |          |             |             |                |
|-------------|-------------|----------|-------------|-------------|----------------|
| KRTAP20-4   | miscRNA     | 16.13981 | 35.31294574 | 2.11863128  | NR_023342.1    |
| RPS3        | mRNA        | 34.59236 | 74.39422241 | 2.118269625 | NM_001260507.1 |
| MDH2        | mRNA        | 14.63485 | 32.11576366 | 2.118073268 | NR_104165.1    |
| ABLIM3      | mRNA        | 2.202757 | 5.783399887 | 2.117987819 | NM_014945.3    |
| USP19       | mRNA        | 7.762953 | 17.5583923  | 2.117823916 | NM_006677.2    |
| COG7        | mRNA        | 3.850293 | 9.266631775 | 2.11670336  | NM_153603.3    |
| EPHX1       | mRNA        | 9.283882 | 20.76396869 | 2.116318356 | NM_001291163.1 |
| RBM42       | mRNA        | 15.54109 | 34.00297657 | 2.116122573 | NM_024321.3    |
| TIMM17B     | mRNA        | 15.53691 | 33.99381752 | 2.116104393 | NM_005834.4    |
| RAB24       | mRNA        | 5.719026 | 13.2167371  | 2.115892421 | NR_109789.1    |
| AIP         | mRNA        | 22.69861 | 49.14043523 | 2.11575398  | NM_003977      |
| CCDC189     | mRNA        | 0.215471 | 1.57145976  | 2.115607431 |                |
| ZNF317      | mRNA        | 13.27587 | 29.20012736 | 2.115467161 | NR_102435.1    |
| DNPEP       | mRNA        | 4.341628 | 10.29822202 | 2.115127063 | NM_012100.2    |
| LOC653080   | ncRNA       | 2.184629 | 5.73580491  | 2.115098762 | Z70705.1       |
| STRIP1      | mRNA        | 8.909018 | 19.95852053 | 2.115095584 | NR_073071.1    |
| NUP210      | mRNA        | 15.00151 | 32.84235785 | 2.114947774 | NM_024923.3    |
| MIR877      | miRNA       | 0        | 1.114883699 | 2.114883699 | NR_030615.1    |
| MIR1272     | Precursor_m | 0        | 1.114883699 | 2.114883699 | NR_031674.1    |
| HDAC11      | mRNA        | 0.767397 | 2.734402882 | 2.112939114 | NM_024827.3    |
| SETD1A      | mRNA        | 6.909019 | 15.7049489  | 2.112139065 | NM_014712      |
| LOC10537737 | lncRNA      | 0        | 1.112010288 | 2.112010288 | XR_949978.1    |
| EMD         | mRNA        | 6.136395 | 14.07051504 | 2.111782724 | NM_000117.2    |
| CTSD        | mRNA        | 50.54603 | 107.848062  | 2.111667245 | NM_001909.4    |
| MIR3191     | miRNA       | 2.162272 | 5.677105152 | 2.111490018 | NR_036159.1    |
| KIF20A      | mRNA        | 16.90198 | 36.79405287 | 2.111166637 | NM_005733.2    |
| TOMM34      | mRNA        | 13.17371 | 28.92211579 | 2.111099431 | NM_006809.4    |
| ERF         | mRNA        | 24.22433 | 52.24609098 | 2.110901685 | NM_006494.3    |
| LOC10537285 | lncRNA      | 0        | 1.110579129 | 2.110579129 | XR_938002.1    |
| UBALD1      | mRNA        | 5.117223 | 11.90866219 | 2.110215932 | NM_145253.2    |
| LTBR        | mRNA        | 20.36044 | 44.07182454 | 2.110060821 | NM_002342.2    |
| UBALD2      | mRNA        | 3.205986 | 7.874348493 | 2.109932835 | NM_182565.3    |
| CLUH        | mRNA        | 12.45707 | 27.3929742  | 2.109892861 | NM_015229.3    |
| NDUFB8      | mRNA        | 17.10718 | 37.20264912 | 2.109806157 | NM_005004.3    |
| LOC10798717 | lncRNA      | 3.883483 | 9.301790863 | 2.109517083 |                |
| RPS9        | mRNA        | 34.50857 | 73.87475266 | 2.108638701 | NM_001013.3    |
| PHLDA2      | mRNA        | 2.143469 | 5.627739021 | 2.108415348 | NM_003311.3    |
| UBR4        | mRNA        | 37.38402 | 79.91090629 | 2.107932015 | NM_020765.2    |
| GNB2        | mRNA        | 9.974518 | 22.12615341 | 2.107259179 | NM_005273.3    |
| CCAR2       | mRNA        | 17.28951 | 37.54018965 | 2.107229521 | NR_033902.1    |
| POLR2E      | mRNA        | 18.9791  | 41.09859655 | 2.107131539 | NM_002695.3    |
| FXR2        | mRNA        | 13.36888 | 29.27437506 | 2.10694101  | NM_004860.3    |
| TROAP       | mRNA        | 26.22823 | 56.31934212 | 2.105143608 | NM_005480.3    |
| PANK4       | mRNA        | 2.928806 | 7.270226689 | 2.105022847 | NM_018216      |
| LHPP        | mRNA        | 2.296899 | 5.939199376 | 2.104765826 | NM_022126.3    |
| SERGEF      | mRNA        | 2.786986 | 6.968867217 | 2.104276809 | NR_104040.1    |

|             |         |          |             |             |                |
|-------------|---------|----------|-------------|-------------|----------------|
| RPL10P9     | ncRNA   | 1.356253 | 3.956533623 | 2.103566006 | RPL10P9        |
| BOK         | mRNA    | 2.816789 | 7.028402489 | 2.103444327 | NM_032515.4    |
| AP1B1       | mRNA    | 16.08714 | 34.93951583 | 2.10330836  | NM_145730.2    |
| GALM        | mRNA    | 6.750677 | 15.29137304 | 2.101929112 | NM_138801.2    |
| RNU6-513P   | ncRNA   | 4.740365 | 11.06307671 | 2.101447714 | RNU6-513P      |
| HSD17B7     | mRNA    | 10.16387 | 22.45811346 | 2.10125307  | NM_016371      |
| SERF2       | mRNA    | 13.03543 | 28.4787921  | 2.100313093 | NR_037672.1    |
| MYO1C       | mRNA    | 12.51079 | 27.35832741 | 2.098939971 | NM_033375.4    |
| SNORA11     | snoRNA  | 0        | 1.097862574 | 2.097862574 | NR_002953.1    |
| MIR4517     | miRNA   | 2.08016  | 5.461518881 | 2.097786678 | NR_039742.1    |
| RAVER1      | mRNA    | 17.70018 | 38.22657871 | 2.097658164 | NM_133452.2    |
| RNF185      | mRNA    | 14.29825 | 31.07090795 | 2.096377055 | NR_024209.1    |
| GUSBP9      | miscRNA | 13.20049 | 28.76399944 | 2.095983742 | NR_033968.1    |
| MAP7D1      | mRNA    | 10.49519 | 23.08371384 | 2.095111477 | NM_018067.4    |
| HDAC7       | mRNA    | 3.508383 | 8.443744498 | 2.094707777 | NM_016596.3    |
| GPX1P1      | ncRNA   | 1.129434 | 3.459587561 | 2.094259563 | GPXP1          |
| LRRC8A      | mRNA    | 10.67246 | 23.43978365 | 2.093798526 | NM_019594.3    |
| AK1         | mRNA    | 2.517436 | 6.364799876 | 2.09379763  | NM_000476.2    |
| CSF3R       | mRNA    | 1.977642 | 5.233564368 | 2.093456478 | NM_172313.2    |
| PLK3        | mRNA    | 1.742922 | 4.739522635 | 2.09248478  | NM_004073      |
| LOC642846   | lncRNA  | 4.978354 | 11.50888803 | 2.092363195 | NR_024374.1    |
| EXOSC4      | mRNA    | 3.85585  | 9.159485855 | 2.092215799 | NM_019037.2    |
| TNFAIP3     | mRNA    | 9.503408 | 20.97501436 | 2.092179491 | NM_006290.3    |
| MICALL1     | mRNA    | 5.04514  | 11.6463802  | 2.091991177 | NM_033386.3    |
| MFI2-AS1    | lncRNA  | 0.3456   | 1.814763372 | 2.091828204 | NR_038285.1    |
| CACTIN      | mRNA    | 5.167979 | 11.9023446  | 2.091827099 | NM_021231.1    |
| FAH         | mRNA    | 3.84083  | 9.123806166 | 2.091336901 | NM_000137.2    |
| LOC10042178 | ncRNA   | 0.527976 | 2.194843331 | 2.090898368 | LOC100421788   |
| C2CD2L      | mRNA    | 2.304487 | 5.908465221 | 2.090631625 | NM_014807.4    |
| MIR221      | miRNA   | 4.4818   | 10.45963616 | 2.090487998 | NR_029635.1    |
| LENG1       | mRNA    | 3.197825 | 7.774053902 | 2.090143077 | NM_024316.2    |
| JMJD4       | mRNA    | 3.482966 | 8.3687166   | 2.089847976 | NM_023007.2    |
| SNORA36A    | snoRNA  | 0        | 1.089545433 | 2.089545433 | NR_002969.1    |
| EXOC7       | mRNA    | 8.154149 | 18.12788178 | 2.08953149  | NM_015219.4    |
| PHF19       | mRNA    | 4.330241 | 10.13750968 | 2.089494539 | NR_104601.1    |
| ACY1        | mRNA    | 2.350407 | 5.999642314 | 2.089191402 | NM_001198898.1 |
| ID2         | mRNA    | 61.20307 | 128.952974  | 2.089173026 | NM_002166.4    |
| MYRF        | mRNA    | 20.91859 | 44.77574925 | 2.08844443  | NM_013279      |
| RNASEH2C    | mRNA    | 2.891311 | 7.126448694 | 2.088357794 | NM_032193.3    |
| STOML2      | mRNA    | 9.876036 | 21.70867882 | 2.087955415 | NM_013442.2    |
| CLN3        | mRNA    | 5.24009  | 12.02885497 | 2.087927503 | NM_001286110.1 |
| POLE        | mRNA    | 13.36422 | 28.97959469 | 2.087102637 | NM_006231.3    |
| LRCH4       | mRNA    | 6.297048 | 14.22200219 | 2.086049231 | NM_002319.4    |
| EZH1        | mRNA    | 3.995292 | 9.41623782  | 2.085211184 | NM_001991.3    |
| TUBA1C      | mRNA    | 38.78659 | 81.95953256 | 2.085113007 | NM_032704      |
| NEURL4      | mRNA    | 5.385878 | 12.31079213 | 2.084410569 | NM_032442.2    |



|           |        |          |             |             |                |
|-----------|--------|----------|-------------|-------------|----------------|
| TLN1      | mRNA   | 31.58445 | 66.91364347 | 2.084234958 | NM_006289.3    |
| RPL37A    | mRNA   | 171.3755 | 358.1802787 | 2.083708675 | NM_000998.4    |
| DIABLO    | mRNA   | 12.34831 | 26.81290768 | 2.083627576 | NM_138930.3    |
| CHPF      | mRNA   | 3.2416   | 7.837733047 | 2.08358462  | NM_024536.5    |
| UBTF      | mRNA   | 9.618677 | 21.11642816 | 2.08278567  | NR_045058.1    |
| C7orf43   | mRNA   | 6.750754 | 15.13598562 | 2.081860008 | NM_018275      |
| FASTK     | mRNA   | 10.13952 | 22.18466241 | 2.081298144 | NM_033015.3    |
| ECI1      | mRNA   | 6.254335 | 14.09463341 | 2.080774264 | NM_001919.3    |
| CALR      | mRNA   | 225.6457 | 470.5194257 | 2.080425483 | NM_004343.3    |
| TUBG2     | mRNA   | 5.920456 | 13.39705913 | 2.080362864 | NM_016437.2    |
| RAB15     | mRNA   | 7.142868 | 15.93460196 | 2.07968518  | NM_198686.2    |
| IFT22     | mRNA   | 3.859724 | 9.103256192 | 2.078977421 | NM_022777.3    |
| DDX51     | mRNA   | 1.637057 | 4.481038488 | 2.078468024 | NM_175066.3    |
| THOP1     | mRNA   | 11.68176 | 25.35613491 | 2.078271595 | NM_003249.3    |
| IFITM3    | mRNA   | 5.904167 | 13.34856261 | 2.078246728 | NR_049759.1    |
| SNORD3A   | snoRNA | 0.757293 | 2.651059856 | 2.077661036 | NR_002906.1    |
| PIGY      | mRNA   | 3.514489 | 8.378893642 | 2.077509547 | NM_001042616.2 |
| WBP2      | mRNA   | 12.76452 | 27.59509205 | 2.077449018 | NM_012478.3    |
| ATG4B     | mRNA   | 7.565877 | 16.79016684 | 2.076864613 | NM_178326.2    |
| CCDC183   | mRNA   | 10.05532 | 21.95853104 | 2.076695391 | NM_032874.2    |
| MIR6859-1 | miRNA  | 9.666626 | 21.14999959 | 2.076570286 | NR_106918.1    |
| ZNF688    | mRNA   | 0.536159 | 2.189755259 | 2.076449003 | NM_145271.3    |
| ABHD16A   | mRNA   | 3.112909 | 7.539462408 | 2.076258417 | NR_033488.1    |
| LZTR1     | mRNA   | 8.073817 | 17.83167984 | 2.075386702 | NM_006767.3    |
| CPQ       | mRNA   | 7.213505 | 16.045761   | 2.075333488 | NM_016134.3    |
| PAFAH2    | mRNA   | 3.434196 | 8.200262998 | 2.074843441 | NM_000437.3    |
| PPP2R4    | mRNA   | 25.36201 | 53.69279895 | 2.074682771 | NM_178003.2    |
| SPAG5     | mRNA   | 49.45515 | 103.6727658 | 2.074570439 | NM_006461.3    |
| POLR2J    | mRNA   | 12.26184 | 26.51253789 | 2.074564724 | NM_006234.4    |
| TSFM      | mRNA   | 7.66156  | 16.96829653 | 2.074487269 | NM_005726.5    |
| PHPT1     | mRNA   | 15.69927 | 33.63532192 | 2.07406166  | NR_109807.1    |
| RBCK1     | mRNA   | 11.44088 | 24.79529572 | 2.073430036 | NM_031229.2    |
| MRPL46    | mRNA   | 8.70963  | 19.12805963 | 2.072999557 | NM_022163.3    |
| SLC2A4    | mRNA   | 1.774313 | 4.749850654 | 2.072531709 | NM_001042.2    |
| JUNB      | mRNA   | 8.234731 | 18.13589172 | 2.072165622 | NM_002229.2    |
| TMEM55B   | mRNA   | 9.248158 | 20.23441519 | 2.072022662 | NM_144568.3    |
| GCDH      | mRNA   | 4.368258 | 10.12286015 | 2.071968104 | NR_102316.1    |
| ANKRD54   | mRNA   | 3.656113 | 8.644917864 | 2.071452783 | NR_036556.1    |
| SLC51B    | mRNA   | 5.244659 | 11.93399977 | 2.071209921 | NM_178859.3    |
| NENF      | mRNA   | 1.385312 | 3.940273896 | 2.071122625 | NR_026598.1    |
| ADA       | mRNA   | 1.26572  | 3.692426115 | 2.071052938 | NM_000022.2    |
| SAMD1     | mRNA   | 11.51214 | 24.91108496 | 2.070875398 | NM_138352.1    |
| ECI2      | mRNA   | 10.77591 | 23.38057331 | 2.070376748 | NR_028588.1    |
| STK16     | mRNA   | 1.844658 | 4.889326396 | 2.070311084 | NR_026909.1    |
| MAPKBP1   | mRNA   | 1.182249 | 3.517899212 | 2.070294742 | NR_049761.1    |
| BET1L     | mRNA   | 8.060972 | 17.75855852 | 2.070258886 | NM_016526.4    |

|             |         |          |             |                            |
|-------------|---------|----------|-------------|----------------------------|
| LOC10798445 | lncRNA  | 0.263776 | 1.615955025 | 2.069950967                |
| MICALL2     | mRNA    | 2.477821 | 6.195799556 | 2.069053837 NM_182924.3    |
| RN7SK       | snRNA   | 7584.546 | 15693.7074  | 2.069028106 NR_001445.2    |
| SNORD44     | snoRNA  | 18.85785 | 40.08098282 | 2.068753314 NR_002750.2    |
| CNIH2       | mRNA    | 4.161825 | 9.678190839 | 2.068684998 NR_073078.1    |
| YWHAH       | mRNA    | 64.4316  | 134.354989  | 2.068648722 NM_003405.3    |
| SNORA103    | snoRNA  | 22.93014 | 48.49744091 | 2.068414421                |
| AHCY        | mRNA    | 26.07264 | 54.97977879 | 2.067761845 NM_001161766.1 |
| MYCN        | mRNA    | 15.74088 | 33.61165175 | 2.067492658 NM_005378.5    |
| INO80E      | mRNA    | 5.951686 | 13.36918284 | 2.067007031 NR_130786.1    |
| MAN2B2      | mRNA    | 9.486544 | 20.67329766 | 2.066772121 NM_015274.2    |
| RUVBL2      | mRNA    | 13.91176 | 29.81549725 | 2.066523326 NM_006666.1    |
| RPS14       | mRNA    | 27.96078 | 58.8354534  | 2.066085953 NM_005617.3    |
| CNP         | mRNA    | 5.003618 | 11.40204497 | 2.065761962 NM_033133.4    |
| LINC01473   | lncRNA  | 1.90137  | 4.992099076 | 2.065265754 NR_110218.1    |
| YKT6        | mRNA    | 10.55508 | 22.86421531 | 2.065257839 NM_006555.3    |
| ZDHHC18     | mRNA    | 5.496951 | 12.41644449 | 2.065037138 NM_032283.2    |
| RPL23       | mRNA    | 254.0463 | 525.6782913 | 2.065029997 NM_000978.3    |
| CAPNS1      | mRNA    | 62.88239 | 130.8872041 | 2.064531411 NM_001749.3    |
| KRT19       | mRNA    | 35.86049 | 75.08753083 | 2.064202918 NM_002276.4    |
| PKP2        | mRNA    | 16.65909 | 35.44471208 | 2.063793536 NM_004572.3    |
| C19orf53    | mRNA    | 21.85082 | 46.14883426 | 2.063331826 NM_014047.2    |
| RPL17P7     | ncRNA   | 12.23188 | 26.29718395 | 2.062986042 RPL17P7        |
| ATAD3B      | mRNA    | 7.166764 | 15.84550849 | 2.062690644 NM_031921.4    |
| GJB1        | mRNA    | 3.722452 | 8.740441818 | 2.062581306 NM_001097642.2 |
| MAD1L1      | mRNA    | 4.340862 | 10.015595   | 2.062512393 NM_003550.2    |
| RPS7P11     | ncRNA   | 0.592831 | 2.282857098 | 2.061020827 RPS7P11        |
| ELOVL1      | mRNA    | 8.287378 | 18.13228747 | 2.060031003 NR_046117.1    |
| SNORA73B    | snoRNA  | 146.6513 | 303.1142979 | 2.059679262 NR_004406.1    |
| TKFC        | mRNA    | 2.378142 | 5.954079386 | 2.058551288 NM_015533.3    |
| SNORD118    | snoRNA  | 0        | 1.057499979 | 2.057499979 NR_033294.1    |
| TLE2        | mRNA    | 2.87672  | 6.975951724 | 2.057396717 NM_003260.4    |
| UBB         | mRNA    | 47.88589 | 99.57667013 | 2.057376105 NM_018955.3    |
| PSMD8       | mRNA    | 24.02524 | 50.46315691 | 2.056449983 NM_002812.4    |
| MYL5        | mRNA    | 0.560862 | 2.208839547 | 2.055812082 NM_002477.1    |
| TMEM132A    | mRNA    | 8.15722  | 17.81940165 | 2.055143624 NM_178031.2    |
| GPC3        | mRNA    | 62.76021 | 130.0282135 | 2.055015464 NM_004484.3    |
| UBE2O       | mRNA    | 12.06027 | 25.83657092 | 2.054825547 NM_022066.3    |
| LGALS3      | mRNA    | 5.712996 | 12.79380343 | 2.054790946 NR_003225.2    |
| ABCB6       | mRNA    | 8.276528 | 18.06089428 | 2.054744339 NM_005689.2    |
| DYNC1H1     | mRNA    | 58.20401 | 120.6322822 | 2.054460136 NM_001376.4    |
| STAP2       | mRNA    | 1.684383 | 4.51452906  | 2.054300132 NM_017720.2    |
| ALOX12P2    | miscRNA | 16.56388 | 35.07171174 | 2.053744362 NR_002710.2    |
| VAMP8       | mRNA    | 9.711431 | 20.99805289 | 2.053698747 NM_003761.4    |
| RN7SL363P   | ncRNA   | 0        | 1.053626353 | 2.053626353 RN7SL363P      |
| NEDD8       | mRNA    | 57.31923 | 118.7377897 | 2.053144273 NM_006156.2    |

|                   |         |          |             |             |              |
|-------------------|---------|----------|-------------|-------------|--------------|
| CHMP2A            | mRNA    | 6.810182 | 15.02983754 | 2.052428197 | NM_198426.2  |
| NTMT1             | mRNA    | 7.240711 | 15.91112038 | 2.052143453 | NR_104596.1  |
| DDX12P            | miscRNA | 5.296985 | 11.92061374 | 2.051873075 | NR_033399.1  |
| TMA7              | mRNA    | 103.9945 | 214.3321772 | 2.050889521 | NM_015933.4  |
| GET4              | mRNA    | 6.138863 | 13.63810318 | 2.050480929 | NM_015949.2  |
| STX10             | mRNA    | 6.488367 | 14.35102628 | 2.049983062 | NM_003765.2  |
| ITIH2             | mRNA    | 135.4237 | 278.6653379 | 2.049976081 | NM_002216.2  |
| CDC25B            | mRNA    | 21.56421 | 45.25504782 | 2.049929487 | NM_212530.1  |
| SNORA49           | snoRNA  | 0        | 1.049781001 | 2.049781001 | NR_002979.2  |
| FADS3             | mRNA    | 4.644184 | 10.56764327 | 2.049480335 | NM_021727.4  |
| SLC9A3R1          | mRNA    | 33.8284  | 70.34053434 | 2.048343853 | NM_004252.4  |
| NAA10             | mRNA    | 3.82169  | 8.876189451 | 2.048283984 | NM_003491.3  |
| PPP1R7            | mRNA    | 5.621277 | 12.56069844 | 2.048048815 | NM_002712.2  |
| CDAN1             | mRNA    | 2.814153 | 6.810925871 | 2.047879425 | NM_138477.2  |
| MXD3              | mRNA    | 2.654509 | 6.483245553 | 2.047674473 | NM_031300.3  |
| GHDC              | mRNA    | 2.204067 | 5.559905217 | 2.047368239 | NR_024573.1  |
| SRM               | mRNA    | 13.74419 | 29.18238488 | 2.047070375 | NM_003132.2  |
| TICAM1            | mRNA    | 2.354509 | 5.864812523 | 2.046443349 | NM_182919.3  |
| MOCS1             | mRNA    | 3.000068 | 7.18581778  | 2.046419862 | NR_033233.1  |
| PTMAP4            | ncRNA   | 5.192407 | 11.66771967 | 2.045686051 | V9HVV7_HUMAN |
| WDR46             | mRNA    | 1.460426 | 4.032194166 | 2.045253554 | NM_005452.5  |
| RNF220            | mRNA    | 9.951341 | 21.38322767 | 2.043880082 | NM_018150.2  |
| LOC440434         | miscRNA | 5.073223 | 11.40461237 | 2.042508802 | NR_036750.2  |
| KDM5C             | mRNA    | 35.70679 | 73.96397116 | 2.042237272 | NM_004187.3  |
| BTBD2             | mRNA    | 9.603856 | 20.65558401 | 2.042236679 | NM_017797.3  |
| MIR1302-3         | miRNA   | 0        | 1.042173893 | 2.042173893 | NR_031632.1  |
| CCDC120           | mRNA    | 4.831058 | 10.90562275 | 2.041760358 | NM_033626.3  |
| CASP6             | mRNA    | 8.013814 | 17.4038648  | 2.041740077 | NM_032992.2  |
| GSK3A             | mRNA    | 12.70806 | 26.98669394 | 2.041623339 | NM_019884.2  |
| OFCC1             | miscRNA | 2.626321 | 6.40294508  | 2.041447876 | NM_153003.1  |
| TMEM51            | mRNA    | 2.925426 | 7.0128946   | 2.041280034 | NM_018022.2  |
| USP21             | mRNA    | 3.11501  | 7.399636219 | 2.0412191   | NM_012475.4  |
| ALYREF            | mRNA    | 20.29449 | 42.4424691  | 2.04008035  | NM_005782.3  |
| FAM73B            | mRNA    | 2.001754 | 5.123442787 | 2.03995509  | NM_032809.2  |
| TSEN54            | mRNA    | 4.06802  | 9.337216072 | 2.03969527  | NM_207346.2  |
| PRRC2A            | mRNA    | 22.86141 | 47.63998612 | 2.03843707  | NM_080686.2  |
| VCP               | mRNA    | 78.14211 | 160.2182348 | 2.03707267  | NM_007126.3  |
| TMEM63A           | mRNA    | 11.98905 | 25.45601028 | 2.036793528 | NM_014698.2  |
| SSR4              | mRNA    | 4.66115  | 10.53035599 | 2.036751412 | NR_037927.1  |
| RTEL1-TNFR lncRNA |         | 1.252709 | 3.588024878 | 2.036669978 | NR_037882.1  |
| PES1              | mRNA    | 10.42811 | 22.27409147 | 2.036565003 | NM_014303.3  |
| URM1              | mRNA    | 2.48248  | 6.08988315  | 2.035871922 | NR_049743.1  |
| MAU2              | mRNA    | 16.42311 | 34.46582665 | 2.035562768 | NM_015329.3  |
| CDX2              | mRNA    | 1.887848 | 4.87792113  | 2.035398566 | NM_001265.4  |
| FHL3              | mRNA    | 3.371943 | 7.898382465 | 2.035338015 | NM_004468.4  |
| DDAH2             | mRNA    | 2.090263 | 5.288478158 | 2.034933222 | NM_013974    |

|                    |             |          |             |             |             |
|--------------------|-------------|----------|-------------|-------------|-------------|
| MRPL23-AS1 lncRNA  |             | 0.345237 | 1.737321395 | 2.034825155 | NR_024471.1 |
| STX4               | mRNA        | 7.622108 | 16.54330209 | 2.034688262 | NM_004604.4 |
| RFXANK             | mRNA        | 8.685175 | 18.70260047 | 2.034305092 | NM_134440.2 |
| MIR331             | Precursor_m | 1.74822  | 4.58999991  | 2.034044057 | NR_029895.1 |
| SPSB3              | mRNA        | 1.326792 | 3.732352868 | 2.033853106 | NM_080861.3 |
| MYD88              | mRNA        | 7.318921 | 15.91327735 | 2.033109483 | NM_002468.4 |
| SEMA3B             | mRNA        | 1.420901 | 3.921928756 | 2.03309802  | NR_110697.1 |
| SNORA57            | snoRNA      | 6.617422 | 14.47852321 | 2.031989682 | NR_004390.1 |
| SETDB1             | mRNA        | 9.30812  | 19.94536711 | 2.031928832 | NM_012432.3 |
| TMEM97             | mRNA        | 106.2588 | 216.915174  | 2.03167662  | NM_014573.2 |
| PTBP1              | mRNA        | 77.17929 | 157.8093794 | 2.031348484 | NM_175847.2 |
| C7orf26            | mRNA        | 2.775291 | 6.66646771  | 2.030695893 | NM_024067   |
| SNORD36A           | snoRNA      | 31.95357 | 65.91749871 | 2.030660017 | NR_002448.1 |
| TRIM27             | mRNA        | 7.472182 | 16.20336445 | 2.030570739 | NM_030950.2 |
| PC                 | mRNA        | 35.96579 | 74.05468276 | 2.030382433 | NM_022172.2 |
| ADHFE1             | mRNA        | 1.474224 | 4.022406254 | 2.029891248 | NM_144650.2 |
| CSK                | mRNA        | 9.457994 | 20.22792047 | 2.029827132 | NM_004383.2 |
| PIIB               | mRNA        | 70.97636 | 145.0791217 | 2.029543097 | NM_000942.4 |
| CD151              | mRNA        | 12.94292 | 27.2970169  | 2.029489992 | NM_139030.3 |
| DKK1               | mRNA        | 42.97231 | 88.20428637 | 2.028647032 | NM_012242.2 |
| APOBEC3B           | mRNA        | 0        | 1.028621566 | 2.028621566 | NM_004900.4 |
| ZFAND2B            | mRNA        | 3.726364 | 8.587890989 | 2.028597691 | NM_138802.2 |
| RUVBL1             | mRNA        | 16.0004  | 33.4858413  | 2.028530712 | NM_003707.2 |
| TAF1C              | mRNA        | 5.067893 | 11.30637491 | 2.028113486 | NM_139353.2 |
| C1QBP              | mRNA        | 34.61866 | 71.22985244 | 2.027865632 | NM_001212.3 |
| SNORD139           | snoRNA      | 71.70879 | 146.4349062 | 2.02774521  |             |
| MRPL23             | mRNA        | 1.610387 | 4.29217809  | 2.027354011 | NM_021134.3 |
| LOC10798617 lncRNA |             | 0        | 1.027285694 | 2.027285694 |             |
| TMEM41A            | mRNA        | 14.87256 | 31.17439045 | 2.027044323 | NM_080652.3 |
| NCAPD2             | mRNA        | 26.36298 | 54.46366935 | 2.026960259 | NM_014865.3 |
| ABHD14A-A          | mRNA        | 2.09898  | 5.281309104 | 2.026895594 | NR_037192.1 |
| DNAJB1             | mRNA        | 33.83319 | 69.60272591 | 2.0268807   | NM_006145.2 |
| ATP5G1P2           | ncRNA       | 0.867954 | 2.785246425 | 2.026412934 | ATP5GP4     |
| RPL13P12           | ncRNA       | 0.695343 | 2.434188951 | 2.025660664 | RPL13P12    |
| CCS                | mRNA        | 34.18222 | 70.21667053 | 2.02422315  | NM_005125.1 |
| HGH1               | mRNA        | 7.466715 | 16.13784243 | 2.024143149 | NM_016458.3 |
| TPRG1L             | mRNA        | 9.67857  | 20.61340981 | 2.023998436 | NM_182752.3 |
| BCL7A              | mRNA        | 4.734935 | 10.60686736 | 2.023888238 | NM_020993   |
| MRPL43             | mRNA        | 6.035462 | 13.23866083 | 2.023841544 | NM_176794.1 |
| CYBA               | mRNA        | 12.28999 | 25.89146389 | 2.023437148 | NM_000101.3 |
| C15orf57           | mRNA        | 3.937136 | 8.988749825 | 2.023186925 | NM_052849.3 |
| PPIF               | mRNA        | 12.09536 | 25.4837796  | 2.022378752 | NM_005729.3 |
| PCGF1              | mRNA        | 2.138157 | 5.346468297 | 2.022355153 | NM_032673.2 |
| SKIV2L             | mRNA        | 2.265978 | 5.604496293 | 2.022211026 | NM_006929.4 |
| PMM2               | mRNA        | 12.66274 | 26.62186775 | 2.021693184 | NM_000303.2 |
| FDPS               | mRNA        | 33.16609 | 68.07105336 | 2.021625647 | NM_002004.3 |

|           |         |          |             |             |                |
|-----------|---------|----------|-------------|-------------|----------------|
| SLC25A11  | mRNA    | 10.60503 | 22.44956382 | 2.020637868 | NM_003562.4    |
| PGD       | mRNA    | 49.25224 | 100.5372531 | 2.020551737 | NM_002631      |
| ATP2A1    | mRNA    | 0.139422 | 1.301538436 | 2.019916617 | NM_173201.3    |
| LLGL1     | mRNA    | 3.885473 | 8.867899688 | 2.019845323 | NM_004140.3    |
| PYCR2     | mRNA    | 14.01142 | 29.31621625 | 2.019543132 | NM_013328.3    |
| EIF3FP3   | ncRNA   | 1.305263 | 3.655472526 | 2.019497086 | EIF3FP3        |
| LINC00571 | lncRNA  | 0.315418 | 1.656276359 | 2.01934051  | NR_047500.1    |
| RPSAP19   | ncRNA   | 0.315418 | 1.656276359 | 2.01934051  | RPSAP19        |
| OSGEP     | mRNA    | 18.60751 | 38.58801155 | 2.019022648 | NM_017807.3    |
| RHOT2     | mRNA    | 9.020371 | 19.22997851 | 2.018885249 | NM_138769.2    |
| RPS4X     | mRNA    | 127.8907 | 259.2069615 | 2.018819035 | NM_001007.4    |
| ALS2CL    | mRNA    | 0.745949 | 2.524303174 | 2.018559758 | NR_033815.1    |
| HP        | mRNA    | 1.021405 | 3.079019277 | 2.017913332 | NM_005143.3    |
| TECR      | mRNA    | 38.90742 | 79.52663396 | 2.017836196 | NR_038103.1    |
| MAFF      | mRNA    | 1.865902 | 4.782335673 | 2.017632068 | NM_152878.1    |
| FBXW5     | mRNA    | 10.7631  | 22.73334753 | 2.017610442 | NM_178226.1    |
| NUCB1     | mRNA    | 14.97409 | 31.22884778 | 2.017570451 | NM_006184.5    |
| C8orf58   | mRNA    | 1.673611 | 4.394112426 | 2.017538323 | NM_173686.2    |
| ZNF503    | mRNA    | 1.034778 | 3.10495946  | 2.017398872 | NR_120651.1    |
| PDXDC2P   | miscRNA | 19.36329 | 40.07985581 | 2.017348871 | NR_003610.1    |
| C1orf43   | mRNA    | 28.48202 | 58.46464172 | 2.016979596 | NM_138740.3    |
| UCHL1     | mRNA    | 65.79154 | 133.7116522 | 2.016896891 | NM_004181.4    |
| EME2      | mRNA    | 0.747938 | 2.52479839  | 2.016546647 | NM_001257370.1 |
| ZNF48     | mRNA    | 1.525243 | 4.090688543 | 2.01592014  | NM_152652.2    |
| PIAS3     | mRNA    | 4.020544 | 9.118842    | 2.01548724  | NM_006099.3    |
| NDUFS2    | mRNA    | 7.689743 | 16.51312793 | 2.015379337 | NM_004550.4    |
| COG4      | mRNA    | 12.72999 | 26.67084455 | 2.015357364 | NM_015386.2    |
| FKBPL     | mRNA    | 0.611357 | 2.247187456 | 2.015188622 | NM_022110.3    |
| TRIP10    | mRNA    | 27.21621 | 55.85808172 | 2.015085825 | NR_110231.1    |
| NSDHL     | mRNA    | 7.098393 | 15.31810621 | 2.014980881 | NM_015922.2    |
| ALG3      | mRNA    | 20.56716 | 42.44749606 | 2.014520754 | NR_024533.1    |
| PSMD3     | mRNA    | 32.53591 | 66.55045138 | 2.014272142 | NM_002809.3    |
| PDLIM7    | mRNA    | 22.43244 | 46.18487358 | 2.01365617  | NR_103804.1    |
| CHMP1A    | mRNA    | 10.78215 | 22.70257771 | 2.011736213 | NR_046418.2    |
| ADRM1     | mRNA    | 21.80784 | 44.88218234 | 2.011684407 | NM_175573.2    |
| SPAG7     | mRNA    | 7.469666 | 16.03810878 | 2.011662438 | NM_004890.2    |
| EIF5A     | mRNA    | 102.6431 | 207.4879455 | 2.011594913 | NM_001970.4    |
| CDC45     | mRNA    | 11.9335  | 25.01217342 | 2.011224673 | NM_003504.4    |
| TOM1      | mRNA    | 9.582673 | 20.2823073  | 2.011052124 | NR_024194.1    |
| SLC26A1   | mRNA    | 6.817293 | 14.71956849 | 2.010871001 | NM_213613.3    |
| HSDL2     | mRNA    | 30.91532 | 63.16843362 | 2.010584225 | NR_036651.1    |
| TBL3      | mRNA    | 3.167553 | 7.373962848 | 2.009323656 | NM_006453.2    |
| HSPA2     | mRNA    | 5.932587 | 12.92822357 | 2.009094771 | NM_021979.3    |
| NTAN1     | mRNA    | 4.313901 | 9.67451991  | 2.008791802 | NM_173474.3    |
| ZFPL1     | mRNA    | 5.335476 | 11.72558419 | 2.008623328 | NM_006782.3    |
| FLNB      | mRNA    | 24.73714 | 50.69482724 | 2.008568855 | NM_001457.3    |

|             |         |          |             |             |             |
|-------------|---------|----------|-------------|-------------|-------------|
| CRAT        | mRNA    | 7.115665 | 15.2989564  | 2.008332729 | NM_144782.1 |
| SAT2        | mRNA    | 6.38185  | 13.82347546 | 2.008097493 | NM_133491.3 |
| GCKR        | mRNA    | 3.228097 | 7.489940466 | 2.007981561 | NM_001486.3 |
| CDIP1       | mRNA    | 6.753397 | 14.56864427 | 2.007977293 | NM_013399.2 |
| PKN1        | mRNA    | 8.963599 | 19.00478534 | 2.007787061 | NM_213560.1 |
| GTF2IP18    | miscRNA | 7.173251 | 15.40928541 | 2.007681671 |             |
| FAM32A      | mRNA    | 15.57894 | 32.28253148 | 2.007519119 | NM_014077   |
| MCM7        | mRNA    | 53.96077 | 109.3218455 | 2.007283489 | NM_182776.2 |
| TAF6L       | mRNA    | 4.81504  | 10.67095442 | 2.007029142 | NM_006473.3 |
| NECAB3      | mRNA    | 7.092336 | 15.23546807 | 2.006277047 | NM_031232.3 |
| RAC3        | mRNA    | 2.934512 | 6.893627685 | 2.0062535   | NM_005052.2 |
| LOC10798572 | mRNA    | 0.149122 | 1.305081644 | 2.005949994 |             |
| MRPS7       | mRNA    | 7.200441 | 15.44921525 | 2.005893932 | NM_015971.3 |
| CYSTM1      | mRNA    | 5.959316 | 12.95960414 | 2.005887415 | NM_032412.3 |
| GPT2        | mRNA    | 16.42501 | 33.95047648 | 2.005764933 | NM_133443   |
| RN7SL449P   | ncRNA   | 0        | 1.005734246 | 2.005734246 | RN7SL449P   |
| MFSD14C     | miscRNA | 17.56227 | 36.22946494 | 2.005652814 |             |
| SHKBP1      | mRNA    | 5.489191 | 12.01002064 | 2.004875648 | NM_138392.3 |
| XYLT2       | mRNA    | 3.742093 | 8.506986782 | 2.00480812  | NR_110010.1 |
| POMGNT1     | mRNA    | 4.5337   | 10.09091261 | 2.004248806 | NM_017739.3 |
| ORMDL2      | mRNA    | 15.64486 | 32.3433277  | 2.003220377 | NM_014182.4 |
| DHCR24      | mRNA    | 125.2624 | 251.8695518 | 2.00272999  | NM_014762.3 |
| NSUN5       | mRNA    | 3.492153 | 7.993265067 | 2.001994489 | NM_148956.3 |
| CIC         | mRNA    | 7.651236 | 16.31432548 | 2.001370154 | NM_015125   |
| AGPAT1      | mRNA    | 5.660994 | 12.33015926 | 2.001226722 | NM_032741.4 |
| TNIP2       | mRNA    | 7.076127 | 15.15428542 | 2.000251464 | NM_024309.3 |
| SCAMP2      | mRNA    | 16.39528 | 33.7943753  | 2.00021891  | NM_005697.3 |
| ZMYM3       | mRNA    | 6.822572 | 14.64528576 | 2.000018221 | NM_201599.2 |

**Table S4. RT-qPCR primers, sgRNA sequences and siRNA sequences**

**RT-qPCR primers**

|           |                        |
|-----------|------------------------|
| TRIM71-qF | AAGAAAGCCCTGGAGGAACG   |
| TRIM71-qR | TTGTTGAGGTTTTGCCGCAG   |
| CEBPA-qF  | ACTAGGAGATTCCGGTGCCT   |
| CEBPA-qR  | GAATTCTCCCCTCCTCGCAG   |
| ACTB-qF   | TTGTTACAGGAAGTCCCTTGCC |
| ACTB-qR   | ATGCTATCACCTCCCCTGTGTG |
| PSPH-qF   | GAGGACGCGGTGTCAGAAAT   |
| PSPH-qR   | GGTTGCTCTGCTATGAGTCTCT |
| PSAT1-qF  | TGCCGCACTCAGTGTGTTAG   |
| PSAT1-qR  | GCAATTCCCGCACAAAGATTCT |
| Psph-qF   | AGGAAGCTCTTCTGTTTCAGCG |
| Psph-qR   | GAGCCTCTGGACTTGATCCC   |
| Psat1-qF  | CAGTGGAGCGCCAGAATAGAA  |
| Psat1-qR  | CCTGTGCCCTTCAAGGAG     |
| CDKN1A-qF | TGTCCGTCAGAACCCATGC    |
| CDKN1A-qR | AAAGTCGAAGTTCATCGCTC   |

**RIP-qPCR primers**

|                  |                      |
|------------------|----------------------|
| CEBPA-RIP-qPCR-F | ACTAGGAGATTCCGGTGCCT |
| CEBPA-RIP-qPCR-R | GAATTCTCCCCTCCTCGCAG |
| m6A-RIP-qF       | ATTCCGGTGCCTCCTGAAAG |
| m6A-RIP-qR       | CCCCCTCATCTTAGACGCAC |

**sgRNA sequences**

|           |                      |
|-----------|----------------------|
| TRIM71-g1 | GCATCCGGTCTCGGGCCAGT |
| TRIM71-g2 | CCCCGACGGAATGATCGTTG |
| CEBPA-g1  | GTAGAAGTCGGCCGACTCCA |
| CEBPA-g2  | GAGCCCCTGTACGAGCGCGT |
| sgPsph-1  | CTCCAGGGATCAAGTCCAG  |
| sgPsph-2  | CTGGACATTACGCTCCTGG  |
| sgPsph-3  | TGACACGGAGAGCCATGGG  |

**siRNA sequences**

|             |                           |
|-------------|---------------------------|
| siTRIM71-1  | GGGCATTGTCTGTCTTTCAAGTGCA |
| siTRIM71-2  | CAGTGGTGGTATATCTATCTCCTTA |
| siMETTL3-1  | CAGGAGATCCTAGAGCTATTAATA  |
| siMETTL3-2  | CCCACCCTGGGATATTCACATGGAA |
| siMETTL3-3  | GATGAGTCTTTAGGTGACTGCTCTT |
| siMETTL3-4  | GCGTGAGAATTGGCTATATCCTGGA |
| siMETTL14-1 | CATATATACCTAAGATGAGATTATA |
| siMETTL14-2 | GGCTGCTTTGTCGGTTGAAAGTTAA |
| siMETTL14-3 | GAGGCCAGGTCAGTGATATGCTATA |
| siMETTL14-4 | CCTGTAATCTTAGGGTTCATGTGTG |
| siIGF2BP1-1 | CCGGGAGCAGACCAGGCAA       |

|             |                           |
|-------------|---------------------------|
| siIGF2BP1-2 | CCAGGCAAGCCAUCAUGAAGCUGAA |
| siIGF2BP1-3 | GGGAAGAGCUGGAGGCCUA       |
| siIGF2BP1-4 | AAGCUGAAUGGCCACCAGUUG     |
| siIGF2BP1-5 | GUAUGGUACAGUAGAGAAC       |
| siCEBPA-1   | CGGTGGACAAGAACAGCAA       |
| siCEBPA-2   | CAGAGAGCTCCTTGGTCAA       |
| siPSPH-1    | CAGGTCTTTCTTGAGGAAATCTGTA |
| siPSPH-2    | TATTTGCCAATAGGCTGAAATTCTA |
